# Supplementary material for: Extensive load of somatic CNVs in the human placenta
Source: PubMed Central journal article supplement (PMC4914949; doi:10.1038/srep08342), 2015-02-10
Supplement: srep08342-s1.pdf [file srep08342-s1.pdf]

## Supplementary Material

### Extensive load of somatic CNVs in the human placenta

Laura Kasak<sup>1</sup>, Kristiina Rull<sup>1,2,3</sup>, Pille Vaas<sup>2,3</sup>, Pille Teesalu<sup>2,3</sup>, Maris Laan<sup>1\*</sup>

<sup>1</sup>Human Molecular Genetics Research Group, Institute of Molecular and Cell Biology, University of Tartu, Riia 23 St., Tartu 51010, Estonia

<sup>2</sup>Department of Obstetrics and Gynaecology, University of Tartu, Puusepa St. 8, Tartu 51014, Estonia

<sup>3</sup>Women's Clinic of Tartu University Hospital, Puusepa St. 8, Tartu 51014, Estonia

\*Corresponding author: [maris.laan@ut.ee](mailto:maris.laan@ut.ee)

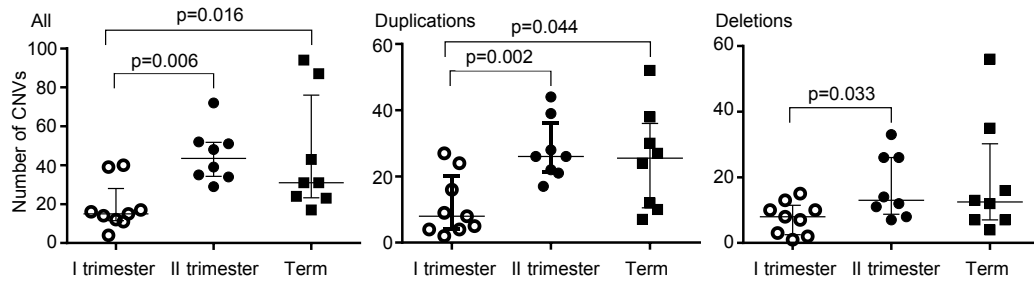

**Supplementary Figure 1. Gradient of increasing number of CNVs from the first trimester towards term pregnancy.** P-values were calculated by Welch two-sample t-test/ Wilcoxon rank sum test. Error bars show medians with interquartile range.

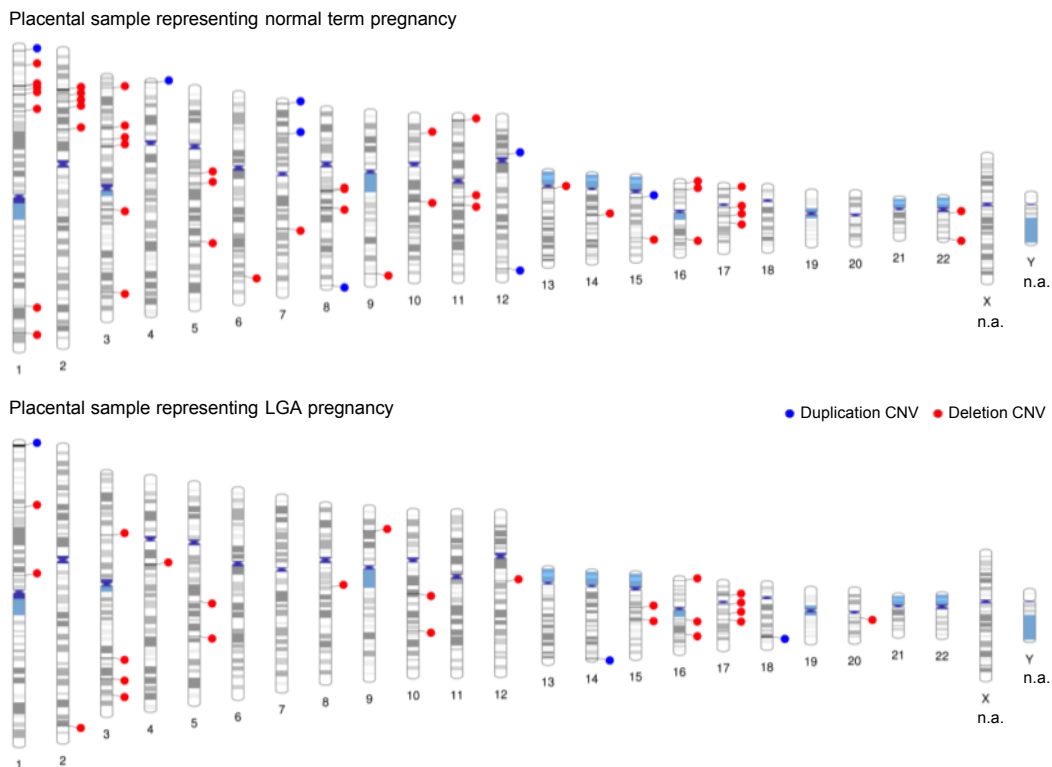

**Supplementary Figure 2. Experimental validation of CNVs determined by SNP array (Illumina HumanOmniExpress Beadchip) using DNA hybridization-based aCGH (Agilent SurePrint G3 Human CGH 2x400K array).** Blue (duplications) and red (deletions) dots indicate genomic locations of the CNVs identified by both methodological approaches in the placental genome for the two validation samples representing a normal term (vaginal delivery; XY karyotype) and an LGA (large-for-gestational age) pregnancy (caesarean section; XY karyotype). aCGH confirmed 56% (53/94) and 49% (28/57) of all CNVs including all inherited CNVs (2 and 3, respectively) identified by the SNP array in the discovery analysis. n.a, not analysed.

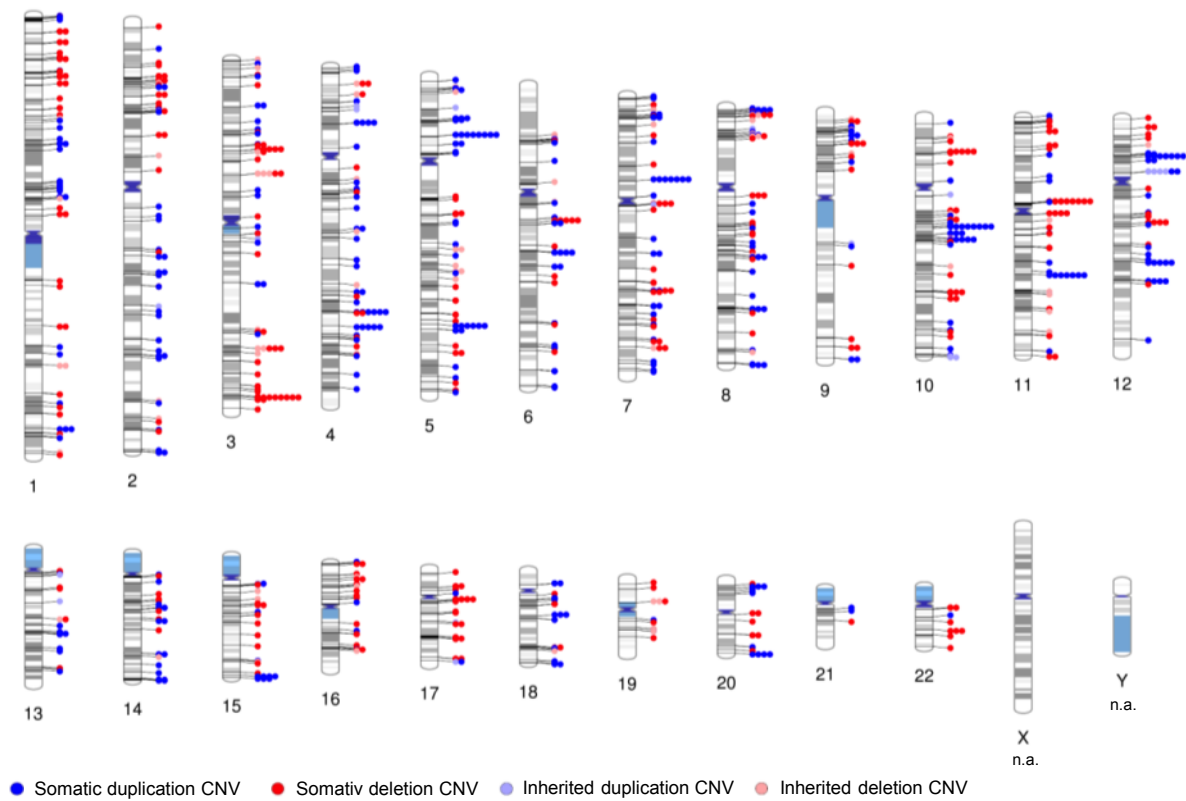

**Supplementary Figure 3. Chromosomal distribution of all identified placental CNVs.** Blue (somatic duplications), red (somatic deletions), light blue (inherited duplications) and light red (inherited deletions) dots indicate genomic locations of all placental CNVs detected by SNP array; <http://visualization.ritchielab.psu.edu/phenograms/plot>. n.a, not analysed.

**Supplementary Table 1. CNVs detected in placental DNA samples**

|                                                   |             | I trimester  | II trimester | Term         |             |               |              |              | Total        |
|---------------------------------------------------|-------------|--------------|--------------|--------------|-------------|---------------|--------------|--------------|--------------|
|                                                   |             |              |              | Normal term  | SGA         | LGA           | PE           | GD           |              |
| <b>No of samples</b>                              |             | 9            | 8            | 8            | 8           | 8             | 8            | 8            | 57           |
| <b>No of CNVs per sample</b>                      | all         | 18.6 (15.0)  | 45.0 (43.5)  | 43.6 (31.0)  | 18.3 (17.0) | 32.6 (19.0)   | 23.9 (22.0)  | 18.8 (16.0)  | 28.5 (23.0)  |
|                                                   | duplication | 10.9 (8.0)   | 27.9 (26.0)  | 25.0 (25.5)  | 10.8 (7.0)  | 11.6 (9.5)    | 10.3 (10.0)  | 11.4 (8.5)   | 15.3 (12.0)  |
|                                                   | deletion    | 7.7 (8.0)    | 17.1 (13.0)  | 18.6 (12.5)  | 7.5 (7.5)   | 21.0 (10.0)   | 13.6 (12.5)  | 7.4 (7.5)    | 13.2 (9.0)   |
| <b>Cumulative span of all CNVs per sample, Mb</b> | all         | 2.2 (1.8)    | 5.2 (5.1)    | 5.7 (4.4)    | 1.5 (1.1)   | 5.1 (2.2)     | 3.7 (3.3)    | 1.6 (2.0)    | 3.6 (2.4)    |
|                                                   | duplication | 1.6 (1.7)    | 3.6 (3.2)    | 3.0 (3.5)    | 1.0 (0.9)   | 2.1 (1.5)     | 1.6 (1.2)    | 1.1 (1.0)    | 2.0 (1.4)    |
|                                                   | deletion    | 0.6 (0.3)    | 1.6 (1.4)    | 2.7 (1.3)    | 0.5 (0.3)   | 3.0 (0.7)     | 2.2 (1.6)    | 0.5 (0.4)    | 1.5 (0.7)    |
| <b>CNV length across samples, kb</b>              | all         | 119.4 (54.9) | 114.8 (64.3) | 130.5 (79.9) | 83.1 (52.8) | 156.6 (97.5)  | 156.2 (85.3) | 85.8 (42.5)  | 124.7 (70.4) |
|                                                   | duplication | 150.4 (80.3) | 129.7 (67.4) | 120.7 (74.5) | 94.7 (73.4) | 183.6 (81.8)  | 152.9 (84.1) | 95.2 (58.4)  | 130.8 (74.9) |
|                                                   | deletion    | 75.5 (26.9)  | 90.6 (58.8)  | 143.5 (90.7) | 66.4 (26.5) | 141.6 (106.9) | 158.8 (93.3) | 71.3 (13.3)  | 117.6 (63.8) |
| <b>CNV size range, kb</b>                         | all         | 0.7; 1,494.6 | 0.9; 1,700.1 | 0.3; 1,814.4 | 0.6; 464.0  | 0.5; 1,798.8  | 0.3; 1,670.6 | 0.9; 1,480.7 | 0.3; 1,814.4 |
|                                                   | duplication | 8.5; 1,494.6 | 4.0; 1,700.1 | 2.2; 1,814.4 | 2.6; 413.9  | 3.6; 1,798.8  | 6.2; 1,670.6 | 2.4; 815.1   | 2.2; 1,814.4 |
|                                                   | deletion    | 0.7; 537.5   | 0.9; 482.4   | 0.3; 784.5   | 0.6; 464.0  | 0.5; 729.4    | 0.3; 1,105.6 | 0.9; 1,480.7 | 0.3; 1,480.7 |
| <b>Ratio (loss/gain)</b>                          |             | 0.7 (1.0)    | 0.6 (0.5)    | 0.7 (0.5)    | 0.7 (1.1)   | 1.8 (1.1)     | 1.3 (1.3)    | 0.6 (0.9)    | 0.9 (0.8)    |

Data are given as means (medians), except when indicated otherwise. No, number; SGA, small-for-gestational age; LGA, large-for-gestational age; PE, preeclampsia; GD, gestational diabetes.

Refer to Figure 2 for statistical testing of CNVs in placental compared to parental blood DNA samples.

**Supplementary Table 2. CNVs detected in parental blood DNA samples**

|                                                               |             | <b>I trimester<br/>(mother)</b> | <b>II trimester<br/>(mother)</b> | <b>Term (mother + father)</b> |             | <b>LGA</b>   | <b>PE</b>    | <b>GD</b>    | <b>Total</b> |
|---------------------------------------------------------------|-------------|---------------------------------|----------------------------------|-------------------------------|-------------|--------------|--------------|--------------|--------------|
|                                                               |             | 8                               | 7                                | <b>Normal term</b>            | <b>SGA</b>  | 15           | 16           | 16           | 93           |
| <b>No of samples</b>                                          |             | 8                               | 7                                | 16                            | 15          | 15           | 16           | 16           | 93           |
| <b>No of CNVs<br/>per sample</b>                              | all         | 10.4 (10.0)                     | 9.1 (9.0)                        | 8.6 (9.5)                     | 8.5 (7.0)   | 9.1 (9.0)    | 9.4 (10.0)   | 11.3 (10.0)  | 9.5 (9.0)    |
|                                                               | duplication | 3.0 (3.0)                       | 2.0 (2.0)                        | 2.3 (2.0)                     | 2.1 (2.0)   | 2.7 (2.0)    | 2.8 (3.0)    | 3.5 (3.0)    | 2.7 (3.0)    |
|                                                               | deletion    | 7.4 (6.5)                       | 7.1 (7.0)                        | 6.3 (7.0)                     | 6.3 (6.0)   | 6.4 (6.0)    | 6.6 (7.0)    | 7.8 (7.0)    | 6.8 (7.0)    |
| <b>Cumulative<br/>span of all<br/>CNVs per<br/>sample, Mb</b> | all         | 0.8 (0.5)                       | 0.8 (0.5)                        | 0.6 (0.7)                     | 0.4 (0.4)   | 0.9 (0.7)    | 1.1 (1.1)    | 1.1 (0.7)    | 0.8 (0.6)    |
|                                                               | duplication | 0.5 (0.2)                       | 0.6 (0.4)                        | 0.3 (0.2)                     | 0.2 (0.1)   | 0.6 (0.2)    | 0.7 (0.6)    | 0.6 (0.3)    | 0.5 (0.3)    |
|                                                               | deletion    | 0.3 (0.3)                       | 0.2 (0.2)                        | 0.3 (0.2)                     | 0.3 (0.2)   | 0.3 (0.3)    | 0.4 (0.3)    | 0.5 (0.3)    | 0.3 (0.3)    |
| <b>CNV length<br/>across<br/>samples, kb</b>                  | all         | 74.2 (30.3)                     | 87.8 (16.5)                      | 71.5 (21.5)                   | 50.6 (22.8) | 99.9 (30.7)  | 120.9 (22.4) | 95.5 (23.5)  | 87.8 (23.0)  |
|                                                               | duplication | 155.5 (75.3)                    | 318.5 (187.4)                    | 134.2 (83.2)                  | 81.3 (40.0) | 220.6 (73.2) | 248.7 (69.7) | 174.6 (51.4) | 183.8 (68.3) |
|                                                               | deletion    | 41.2 (16.5)                     | 23.2 (12.1)                      | 48.3 (16.2)                   | 40.2 (21.1) | 48.4 (15.6)  | 66.7 (16.1)  | 59.8 (19.3)  | 49.8 (16.5)  |
| <b>CNV size<br/>range, kb</b>                                 | all         | 1.4; 1,298.5                    | 0.3; 1,289.1                     | 0.3; 539.5                    | 1.3; 610.6  | 0.3; 2,039.5 | 0.3; 2,392.4 | 0.3; 1,420.2 | 0.3; 2,392.4 |
|                                                               | duplication | 6.7; 1,298.5                    | 28.4; 1,289.1                    | 2.2; 539.5                    | 10.3; 610.6 | 2.5; 2,039.5 | 2.2; 2,392.4 | 2.5; 1,420.2 | 2.2; 2,392.4 |
|                                                               | deletion    | 1.4; 327.9                      | 0.3; 131.0                       | 0.3; 477.2                    | 1.3; 267.0  | 0.3; 948.6   | 0.3; 1,629.9 | 0.3; 1,391.2 | 0.3; 1,629.9 |
| <b>Ratio (loss/gain)</b>                                      |             | 2.5 (2.2)                       | 3.6 (3.5)                        | 2.7 (3.5)                     | 3.0 (3.0)   | 2.3 (3.0)    | 2.4 (2.3)    | 2.2 (2.3)    | 2.5 (2.3)    |

Data are given as means (medians), except when indicated otherwise. No, number; SGA, small-for-gestational age; LGA, large-for-gestational age; PE, preeclampsia; GD, gestational diabetes.

Refer to Figure 2 for statistical testing of CNVs in placental compared to parental blood DNA samples.

**Supplementary Table 3. Copy number variants identified based on Illumina HumanOmniExpress array genotyping and CNV calling in placental (n=57), maternal and paternal blood DNA (n=93). Genomic coordinates are given according to hg19.**

**a. Placental CNVs**

| Chr | Start    | End      | Length  | Group        | Type | Inherited/somatic                |
|-----|----------|----------|---------|--------------|------|----------------------------------|
| 1   | 1138912  | 1288823  | 149911  | LGA          | Dupl | somatic                          |
| 1   | 1647686  | 1664019  | 16333   | LGA          | Del  | somatic                          |
| 1   | 1852484  | 3651318  | 1798834 | LGA          | Dupl | somatic                          |
| 1   | 1967953  | 3668004  | 1700051 | II_trimester | Dupl | somatic or paternally inherited* |
| 1   | 1987802  | 3531594  | 1543792 | LGA          | Dupl | somatic                          |
| 1   | 2307481  | 3654746  | 1347265 | II_trimester | Dupl | somatic or paternally inherited* |
| 1   | 2769542  | 3657759  | 888217  | II_trimester | Dupl | somatic or paternally inherited* |
| 1   | 3423467  | 3691528  | 268061  | normal term  | Dupl | somatic                          |
| 1   | 9970779  | 10094313 | 123534  | II_trimester | Del  | somatic or paternally inherited* |
| 1   | 9983329  | 10257166 | 273837  | normal term  | Del  | somatic                          |
| 1   | 9983329  | 10338598 | 355269  | LGA          | Del  | somatic                          |
| 1   | 9983329  | 10094313 | 110984  | II_trimester | Del  | somatic or paternally inherited* |
| 1   | 9995102  | 10338598 | 343496  | PE           | Del  | somatic                          |
| 1   | 10008221 | 10193821 | 185600  | PE           | Del  | somatic                          |
| 1   | 10009925 | 10120793 | 110868  | LGA          | Del  | somatic                          |
| 1   | 10009925 | 10265606 | 255681  | GD           | Del  | somatic                          |
| 1   | 10651460 | 10874522 | 223062  | II_trimester | Dupl | somatic or paternally inherited* |
| 1   | 12911200 | 12951774 | 40574   | SGA          | Del  | somatic or paternally inherited* |
| 1   | 12911200 | 12951774 | 40574   | LGA          | Del  | somatic or paternally inherited* |
| 1   | 15783771 | 15796808 | 13037   | normal term  | Del  | maternally inherited             |
| 1   | 16089356 | 16212219 | 122863  | LGA          | Del  | somatic                          |
| 1   | 16089356 | 16207862 | 118506  | PE           | Del  | somatic                          |
| 1   | 22054427 | 22127991 | 73564   | LGA          | Del  | somatic                          |
| 1   | 24206984 | 24264243 | 57259   | LGA          | Del  | somatic                          |
| 1   | 24901120 | 25121934 | 220814  | normal term  | Del  | somatic                          |
| 1   | 25598275 | 25655537 | 57262   | II_trimester | Del  | maternally inherited             |
| 1   | 25598275 | 25655537 | 57262   | I_trimester  | Del  | maternally inherited             |
| 1   | 25598275 | 25655537 | 57262   | normal term  | Del  | somatic                          |
| 1   | 25598275 | 25655537 | 57262   | normal term  | Del  | somatic                          |
| 1   | 25598275 | 25655537 | 57262   | II_trimester | Del  | somatic or paternally inherited* |
| 1   | 29004745 | 29038609 | 33864   | I_trimester  | Del  | somatic or paternally inherited* |
| 1   | 31504962 | 31682312 | 177350  | II_trimester | Del  | somatic or paternally inherited* |
| 1   | 32031671 | 32266025 | 234354  | LGA          | Dupl | somatic                          |
| 1   | 32277198 | 32595114 | 317916  | normal term  | Del  | somatic                          |
| 1   | 32904610 | 33092931 | 188321  | normal term  | Del  | somatic                          |
| 1   | 32993521 | 33100814 | 107293  | LGA          | Del  | somatic                          |
| 1   | 35107269 | 35110442 | 3173    | SGA          | Del  | somatic                          |
| 1   | 35107269 | 35110442 | 3173    | GD           | Del  | somatic                          |
| 1   | 35674310 | 35695273 | 20963   | normal term  | Del  | somatic                          |
| 1   | 39350742 | 39705874 | 355132  | normal term  | Del  | somatic                          |
| 1   | 39350742 | 39528071 | 177329  | LGA          | Del  | somatic                          |

| Chr | Start     | End       | Length | Group        | Type | Inherited/somatic                |
|-----|-----------|-----------|--------|--------------|------|----------------------------------|
| 1   | 39492462  | 39545269  | 52807  | II_trimester | Del  | somatic or paternally inherited* |
| 1   | 39498491  | 39550621  | 52130  | II_trimester | Del  | somatic or paternally inherited* |
| 1   | 47794591  | 47806157  | 11566  | normal term  | Del  | somatic                          |
| 1   | 53135933  | 53459180  | 323247 | normal term  | Del  | somatic                          |
| 1   | 53173052  | 53218380  | 45328  | normal term  | Del  | somatic                          |
| 1   | 53180565  | 53374666  | 194101 | LGA          | Del  | somatic                          |
| 1   | 57057316  | 57088604  | 31288  | normal term  | Del  | somatic                          |
| 1   | 59007636  | 59086221  | 78585  | SGA          | Del  | maternally inherited             |
| 1   | 60244033  | 60338776  | 94743  | SGA          | Dupl | somatic                          |
| 1   | 64320736  | 64462582  | 141846 | normal term  | Dupl | somatic                          |
| 1   | 70571471  | 70587360  | 15889  | normal term  | Dupl | somatic                          |
| 1   | 72993809  | 73096321  | 102512 | GD           | Dupl | somatic                          |
| 1   | 73012228  | 73096321  | 84093  | II_trimester | Dupl | parental data not available      |
| 1   | 73378037  | 73482160  | 104123 | normal term  | Dupl | somatic                          |
| 1   | 73378037  | 73482160  | 104123 | normal term  | Dupl | somatic                          |
| 1   | 73386470  | 73482160  | 95690  | normal term  | Dupl | somatic                          |
| 1   | 73390986  | 73482160  | 91174  | II_trimester | Dupl | somatic or paternally inherited* |
| 1   | 76342180  | 76383297  | 41117  | SGA          | Dupl | somatic                          |
| 1   | 81212467  | 81386925  | 174458 | II_trimester | Dupl | somatic or paternally inherited* |
| 1   | 86402185  | 86404202  | 2017   | I_trimester  | Del  | somatic or paternally inherited* |
| 1   | 94352380  | 94372877  | 20497  | SGA          | Dupl | somatic                          |
| 1   | 94867056  | 94986888  | 119832 | LGA          | Dupl | somatic                          |
| 1   | 96321437  | 96490962  | 169525 | normal term  | Dupl | somatic                          |
| 1   | 96463024  | 96490962  | 27938  | II_trimester | Dupl | somatic or paternally inherited* |
| 1   | 96469814  | 96490962  | 21148  | II_trimester | Dupl | somatic or paternally inherited* |
| 1   | 96469814  | 96490962  | 21148  | I_trimester  | Dupl | somatic or paternally inherited* |
| 1   | 97542236  | 97583471  | 41235  | II_trimester | Dupl | somatic or paternally inherited* |
| 1   | 97542797  | 97588913  | 46116  | normal term  | Dupl | somatic                          |
| 1   | 97870315  | 98357743  | 487428 | II_trimester | Dupl | somatic or paternally inherited* |
| 1   | 98057444  | 98075762  | 18318  | I_trimester  | Dupl | somatic or paternally inherited* |
| 1   | 98069671  | 98348884  | 279213 | normal term  | Dupl | somatic                          |
| 1   | 98203820  | 98357743  | 153923 | PE           | Dupl | somatic                          |
| 1   | 98229591  | 98371448  | 141857 | PE           | Dupl | somatic                          |
| 1   | 98292912  | 98316285  | 23373  | normal term  | Dupl | somatic                          |
| 1   | 98292912  | 98316285  | 23373  | II_trimester | Dupl | somatic or paternally inherited* |
| 1   | 99770075  | 99809451  | 39376  | normal term  | Dupl | somatic                          |
| 1   | 99783335  | 99809451  | 26116  | SGA          | Dupl | somatic                          |
| 1   | 99783335  | 99800813  | 17478  | II_trimester | Dupl | somatic or paternally inherited* |
| 1   | 103161803 | 103508275 | 346472 | SGA          | Dupl | somatic                          |
| 1   | 103165230 | 103467615 | 302385 | normal term  | Dupl | somatic                          |
| 1   | 103328723 | 103548496 | 219773 | normal term  | Dupl | somatic                          |
| 1   | 103328723 | 103508275 | 179552 | SGA          | Dupl | somatic                          |
| 1   | 103342391 | 103551498 | 209107 | GD           | Dupl | somatic                          |
| 1   | 103342391 | 103467615 | 125224 | I_trimester  | Dupl | somatic or paternally inherited* |
| 1   | 103348100 | 103379917 | 31817  | II_trimester | Dupl | somatic or paternally inherited* |
| 1   | 104146557 | 104211046 | 64489  | normal term  | Del  | maternally inherited             |
| 1   | 104146557 | 104155944 | 9387   | I trimester  | Del  | maternally inherited             |

| Chr | Start     | End       | Length | Group        | Type | Inherited/somatic                |
|-----|-----------|-----------|--------|--------------|------|----------------------------------|
| 1   | 109503656 | 109605378 | 101722 | II_trimester | Del  | somatic or paternally inherited* |
| 1   | 109549512 | 109605378 | 55866  | LGA          | Del  | somatic                          |
| 1   | 113023979 | 113040420 | 16441  | normal term  | Del  | somatic                          |
| 1   | 113023979 | 113046394 | 22415  | II_trimester | Del  | somatic or paternally inherited* |
| 1   | 113026556 | 113040420 | 13864  | normal term  | Del  | somatic                          |
| 1   | 113026556 | 113040420 | 13864  | GD           | Del  | somatic                          |
| 1   | 149039031 | 149388389 | 349358 | normal term  | Del  | somatic                          |
| 1   | 149039031 | 149376652 | 337621 | II_trimester | Del  | somatic or paternally inherited* |
| 1   | 152231425 | 152259742 | 28317  | PE           | Del  | somatic                          |
| 1   | 153674703 | 153696665 | 21962  | II_trimester | Del  | somatic or paternally inherited* |
| 1   | 153989774 | 154128128 | 138354 | II_trimester | Del  | somatic or paternally inherited* |
| 1   | 172106805 | 172185028 | 78223  | I_trimester  | Dupl | somatic or paternally inherited* |
| 1   | 174797867 | 174801639 | 3772   | PE           | Del  | somatic                          |
| 1   | 174797867 | 174801639 | 3772   | PE           | Del  | somatic                          |
| 1   | 186281400 | 186441585 | 160185 | SGA          | Dupl | somatic                          |
| 1   | 190416297 | 190476831 | 60534  | normal term  | Dupl | somatic                          |
| 1   | 190416297 | 190492543 | 76246  | LGA          | Dupl | somatic or paternally inherited* |
| 1   | 194299382 | 194334907 | 35525  | II_trimester | Dupl | somatic or paternally inherited* |
| 1   | 194299382 | 194334907 | 35525  | I_trimester  | Dupl | somatic or paternally inherited* |
| 1   | 196823299 | 196855303 | 32004  | SGA          | Del  | paternally inherited             |
| 1   | 196823299 | 196843710 | 20411  | LGA          | Del  | paternally inherited             |
| 1   | 196823299 | 196855303 | 32004  | I_trimester  | Del  | somatic or paternally inherited* |
| 1   | 201239651 | 201301111 | 61460  | II_trimester | Dupl | somatic or paternally inherited* |
| 1   | 212928156 | 213088494 | 160338 | normal term  | Del  | somatic                          |
| 1   | 212986554 | 213020221 | 33667  | SGA          | Del  | paternally inherited             |
| 1   | 212997385 | 213011811 | 14426  | I_trimester  | Del  | maternally inherited             |
| 1   | 212997385 | 213020221 | 22836  | normal term  | Del  | somatic                          |
| 1   | 218003361 | 218019292 | 15931  | normal term  | Dupl | somatic                          |
| 1   | 220197624 | 220314945 | 117321 | LGA          | Del  | somatic                          |
| 1   | 224273311 | 224570283 | 296972 | LGA          | Del  | somatic                          |
| 1   | 224273311 | 224570283 | 296972 | II_trimester | Del  | somatic or paternally inherited* |
| 1   | 224278988 | 224570283 | 291295 | PE           | Del  | somatic                          |
| 1   | 232575539 | 232607762 | 32223  | normal term  | Dupl | somatic                          |
| 1   | 232575539 | 232584061 | 8522   | PE           | Dupl | somatic                          |
| 1   | 232575539 | 232604178 | 28639  | PE           | Dupl | somatic                          |
| 1   | 232575539 | 232607762 | 32223  | II_trimester | Dupl | somatic or paternally inherited* |
| 1   | 235248412 | 235854739 | 606327 | LGA          | Del  | somatic                          |
| 1   | 235268017 | 235656128 | 388111 | normal term  | Del  | somatic                          |
| 1   | 236984561 | 237128380 | 143819 | LGA          | Del  | maternally inherited             |
| 1   | 237584925 | 237614434 | 29509  | LGA          | Dupl | somatic                          |
| 1   | 237584925 | 237617757 | 32832  | I_trimester  | Dupl | somatic or paternally inherited* |
| 1   | 245636915 | 245647726 | 10811  | normal term  | Del  | paternally inherited             |
| 1   | 247145690 | 247179076 | 33386  | LGA          | Del  | somatic                          |
| 2   | 4213378   | 4222144   | 8766   | normal term  | Del  | somatic                          |
| 2   | 16726739  | 16752999  | 26260  | LGA          | Dupl | somatic                          |
| 2   | 24662502  | 24672179  | 9677   | LGA          | Del  | somatic                          |
| 2   | 26117455  | 26385849  | 268394 | PE           | Del  | somatic                          |



| Chr | Start     | End       | Length | Group        | Type | Inherited/somatic                |
|-----|-----------|-----------|--------|--------------|------|----------------------------------|
| 2   | 32112652  | 32758353  | 645701 | PE           | Del  | somatic                          |
| 2   | 32145414  | 32969116  | 823702 | PE           | Del  | somatic                          |
| 2   | 32145414  | 32611512  | 466098 | PE           | Del  | somatic                          |
| 2   | 32148619  | 32933095  | 784476 | normal term  | Del  | somatic                          |
| 2   | 32148619  | 32612647  | 464028 | SGA          | Del  | somatic or paternally inherited* |
| 2   | 34042593  | 34048462  | 5869   | LGA          | Del  | somatic                          |
| 2   | 34678045  | 34726904  | 48859  | normal term  | Del  | somatic                          |
| 2   | 34678045  | 34726904  | 48859  | LGA          | Del  | somatic                          |
| 2   | 34678045  | 34726904  | 48859  | I_trimester  | Del  | somatic or paternally inherited* |
| 2   | 34699812  | 34726904  | 27092  | II_trimester | Del  | parental data not available      |
| 2   | 34699812  | 34726904  | 27092  | SGA          | Del  | somatic                          |
| 2   | 34699812  | 34726904  | 27092  | LGA          | Del  | somatic                          |
| 2   | 34699812  | 34726904  | 27092  | II_trimester | Del  | somatic or paternally inherited* |
| 2   | 34699812  | 34726904  | 27092  | II_trimester | Del  | somatic or paternally inherited* |
| 2   | 35819686  | 36087642  | 267956 | SGA          | Del  | paternally inherited             |
| 2   | 37122552  | 37290658  | 168106 | normal term  | Del  | somatic                          |
| 2   | 38295493  | 38303094  | 7601   | PE           | Dupl | somatic                          |
| 2   | 38295493  | 38303094  | 7601   | GD           | Dupl | somatic                          |
| 2   | 38296889  | 38303094  | 6205   | PE           | Dupl | somatic                          |
| 2   | 40839463  | 40896385  | 56922  | II_trimester | Dupl | somatic or paternally inherited* |
| 2   | 40846875  | 40884332  | 37457  | II_trimester | Dupl | somatic or paternally inherited* |
| 2   | 42615496  | 42895487  | 279991 | normal term  | Del  | somatic                          |
| 2   | 42690479  | 42881534  | 191055 | LGA          | Del  | somatic                          |
| 2   | 42690479  | 42881534  | 191055 | PE           | Del  | somatic                          |
| 2   | 47494799  | 47629897  | 135098 | PE           | Del  | somatic                          |
| 2   | 47494799  | 47643456  | 148657 | II_trimester | Del  | somatic or paternally inherited* |
| 2   | 47563573  | 47643456  | 79883  | normal term  | Del  | somatic                          |
| 2   | 49535856  | 49537795  | 1939   | GD           | Del  | somatic                          |
| 2   | 51123048  | 51212751  | 89703  | normal term  | Dupl | somatic                          |
| 2   | 51136802  | 51212751  | 75949  | GD           | Dupl | somatic                          |
| 2   | 51279394  | 51294096  | 14702  | GD           | Dupl | somatic                          |
| 2   | 51889503  | 51928206  | 38703  | GD           | Dupl | somatic                          |
| 2   | 51911211  | 51928206  | 16995  | normal term  | Dupl | somatic                          |
| 2   | 51926599  | 51926904  | 305    | PE           | Del  | maternally/paternally inherited  |
| 2   | 51926599  | 51926904  | 305    | normal term  | Del  | somatic                          |
| 2   | 52324160  | 52434608  | 110448 | SGA          | Dupl | somatic                          |
| 2   | 52326591  | 52397517  | 70926  | II_trimester | Dupl | parental data not available      |
| 2   | 52326591  | 52369737  | 43146  | I_trimester  | Dupl | somatic or paternally inherited* |
| 2   | 52338106  | 52369737  | 31631  | PE           | Dupl | somatic                          |
| 2   | 52338106  | 52369737  | 31631  | I_trimester  | Dupl | somatic or paternally inherited* |
| 2   | 54187868  | 54280129  | 92261  | II_trimester | Del  | somatic or paternally inherited* |
| 2   | 65328694  | 65480620  | 151926 | normal term  | Del  | somatic                          |
| 2   | 65328694  | 65490659  | 161965 | LGA          | Del  | somatic                          |
| 2   | 76941049  | 76949101  | 8052   | LGA          | Del  | maternally inherited             |
| 2   | 82188494  | 82351371  | 162877 | II_trimester | Dupl | somatic or paternally inherited* |
| 2   | 85131734  | 85339839  | 208105 | LGA          | Del  | somatic                          |
| 2   | 105690136 | 105711904 | 21768  | I trimester  | Dupl | parental data not available      |

| Chr | Start     | End       | Length | Group        | Type | Inherited/somatic                |
|-----|-----------|-----------|--------|--------------|------|----------------------------------|
| 2   | 105690136 | 105711904 | 21768  | GD           | Dupl | somatic                          |
| 2   | 105690136 | 105711904 | 21768  | II_trimester | Dupl | somatic or paternally inherited* |
| 2   | 105690136 | 105711904 | 21768  | II_trimester | Dupl | somatic or paternally inherited* |
| 2   | 105690136 | 105711904 | 21768  | I_trimester  | Dupl | somatic or paternally inherited* |
| 2   | 110863908 | 110958329 | 94421  | II_trimester | Dupl | somatic or paternally inherited* |
| 2   | 110885620 | 110958329 | 72709  | normal term  | Dupl | somatic                          |
| 2   | 110885620 | 110905664 | 20044  | I_trimester  | Dupl | somatic or paternally inherited* |
| 2   | 110889108 | 110958329 | 69221  | I_trimester  | Dupl | parental data not available      |
| 2   | 113041461 | 113053061 | 11600  | GD           | Dupl | somatic                          |
| 2   | 123801083 | 123878592 | 77509  | I_trimester  | Dupl | maternally inherited             |
| 2   | 128388861 | 128410169 | 21308  | normal term  | Dupl | somatic                          |
| 2   | 129641434 | 129645321 | 3887   | II_trimester | Del  | somatic or paternally inherited* |
| 2   | 129777555 | 129785399 | 7844   | PE           | Del  | somatic                          |
| 2   | 129784722 | 129785399 | 677    | I_trimester  | Del  | somatic or paternally inherited* |
| 2   | 132343339 | 132509621 | 166282 | GD           | Dupl | somatic                          |
| 2   | 132343339 | 132514741 | 171402 | GD           | Dupl | somatic                          |
| 2   | 132343339 | 132509621 | 166282 | I_trimester  | Dupl | somatic or paternally inherited* |
| 2   | 132343339 | 132496366 | 153027 | I_trimester  | Dupl | somatic or paternally inherited* |
| 2   | 132352058 | 132509621 | 157563 | II_trimester | Dupl | parental data not available      |
| 2   | 132352058 | 132649834 | 297776 | II_trimester | Dupl | somatic or paternally inherited* |
| 2   | 141125405 | 141154077 | 28672  | PE           | Dupl | somatic                          |
| 2   | 141125405 | 141154077 | 28672  | GD           | Dupl | somatic                          |
| 2   | 142592559 | 142639631 | 47072  | II_trimester | Dupl | parental data not available      |
| 2   | 142592559 | 142668576 | 76017  | GD           | Dupl | somatic                          |
| 2   | 142794718 | 142868146 | 73428  | SGA          | Dupl | somatic                          |
| 2   | 149164048 | 149170115 | 6067   | LGA          | Del  | somatic                          |
| 2   | 149206943 | 149276546 | 69603  | PE           | Dupl | somatic                          |
| 2   | 149206943 | 149283070 | 76127  | II_trimester | Dupl | somatic or paternally inherited* |
| 2   | 154701808 | 155115686 | 413878 | I_trimester  | Dupl | parental data not available      |
| 2   | 160291593 | 160569276 | 277683 | PE           | Dupl | maternally inherited             |
| 2   | 163005157 | 163243108 | 237951 | I_trimester  | Dupl | somatic or paternally inherited* |
| 2   | 163194668 | 163243108 | 48440  | PE           | Dupl | somatic                          |
| 2   | 165526338 | 165588818 | 62480  | GD           | Dupl | somatic                          |
| 2   | 176769442 | 176809605 | 40163  | II_trimester | Dupl | somatic or paternally inherited* |
| 2   | 179390647 | 179668850 | 278203 | normal term  | Dupl | somatic                          |
| 2   | 179479741 | 179668850 | 189109 | II_trimester | Dupl | somatic or paternally inherited* |
| 2   | 179490954 | 179668850 | 177896 | normal term  | Dupl | somatic                          |
| 2   | 179490954 | 179668850 | 177896 | II_trimester | Dupl | somatic or paternally inherited* |
| 2   | 184797826 | 184802609 | 4783   | I_trimester  | Del  | somatic or paternally inherited* |
| 2   | 185428946 | 185564834 | 135888 | SGA          | Dupl | somatic                          |
| 2   | 188156578 | 188684507 | 527929 | II_trimester | Dupl | somatic or paternally inherited* |
| 2   | 188256157 | 188554359 | 298202 | PE           | Dupl | somatic                          |
| 2   | 188256157 | 188554359 | 298202 | GD           | Dupl | somatic                          |
| 2   | 188256157 | 188554359 | 298202 | II_trimester | Dupl | somatic or paternally inherited* |
| 2   | 188388310 | 188545602 | 157292 | GD           | Dupl | somatic                          |
| 2   | 189757531 | 189874459 | 116928 | PE           | Dupl | somatic                          |
| 2   | 189833034 | 189874459 | 41425  | II_trimester | Dupl | somatic or paternally inherited* |

| Chr | Start     | End       | Length | Group        | Type | Inherited/somatic                |
|-----|-----------|-----------|--------|--------------|------|----------------------------------|
| 2   | 191749035 | 191800904 | 51869  | II_trimester | Dupl | somatic or paternally inherited* |
| 2   | 198603121 | 198631713 | 28592  | II_trimester | Del  | somatic or paternally inherited* |
| 2   | 199166382 | 199185440 | 19058  | I_trimester  | Dupl | parental data not available      |
| 2   | 208355808 | 208357837 | 2029   | II_trimester | Del  | somatic or paternally inherited* |
| 2   | 213187034 | 213191389 | 4355   | II_trimester | Del  | maternally inherited             |
| 2   | 213635052 | 213649587 | 14535  | LGA          | Del  | paternally inherited             |
| 2   | 214884986 | 214895245 | 10259  | SGA          | Dupl | somatic                          |
| 2   | 223563574 | 223588671 | 25097  | GD           | Del  | paternally inherited             |
| 2   | 223563574 | 223588671 | 25097  | II_trimester | Del  | somatic or paternally inherited* |
| 2   | 225473263 | 225553128 | 79865  | LGA          | Del  | somatic                          |
| 2   | 229915119 | 229922254 | 7135   | LGA          | Dupl | somatic                          |
| 2   | 230763690 | 230866297 | 102607 | LGA          | Del  | somatic                          |
| 2   | 230822296 | 230959540 | 137244 | LGA          | Del  | somatic                          |
| 2   | 241491444 | 241541639 | 50195  | normal term  | Dupl | somatic                          |
| 2   | 242634818 | 243048760 | 413942 | SGA          | Dupl | somatic or paternally inherited* |
| 2   | 242710662 | 243048760 | 338098 | PE           | Dupl | somatic                          |
| 2   | 242710662 | 243048760 | 338098 | PE           | Dupl | somatic                          |
| 2   | 242710662 | 243048760 | 338098 | II_trimester | Dupl | somatic or paternally inherited* |
| 2   | 242710935 | 243048760 | 337825 | LGA          | Dupl | somatic                          |
| 2   | 242795350 | 243048760 | 253410 | LGA          | Dupl | somatic                          |
| 3   | 857325    | 1067598   | 210273 | GD           | Del  | maternally inherited             |
| 3   | 3189279   | 3208732   | 19453  | GD           | Dupl | somatic                          |
| 3   | 5400168   | 5438374   | 38206  | normal term  | Del  | maternally inherited             |
| 3   | 9540323   | 9660064   | 119741 | normal term  | Del  | somatic                          |
| 3   | 10382638  | 10512428  | 129790 | normal term  | Dupl | somatic                          |
| 3   | 15371003  | 15450399  | 79396  | LGA          | Del  | somatic                          |
| 3   | 26843377  | 26881106  | 37729  | GD           | Dupl | somatic                          |
| 3   | 26843377  | 26898377  | 55000  | GD           | Dupl | somatic                          |
| 3   | 26843377  | 26881106  | 37729  | II_trimester | Dupl | somatic or paternally inherited* |
| 3   | 29633157  | 29693244  | 60087  | II_trimester | Dupl | somatic or paternally inherited* |
| 3   | 29638641  | 29700225  | 61584  | II_trimester | Dupl | parental data not available      |
| 3   | 35678494  | 35762320  | 83826  | normal term  | Dupl | somatic                          |
| 3   | 37979882  | 37986249  | 6367   | II_trimester | Del  | maternally inherited             |
| 3   | 40223615  | 40249048  | 25433  | GD           | Dupl | somatic                          |
| 3   | 40223615  | 40249048  | 25433  | II_trimester | Dupl | somatic or paternally inherited* |
| 3   | 40223615  | 40249048  | 25433  | II_trimester | Dupl | somatic or paternally inherited* |
| 3   | 40223615  | 40249244  | 25629  | I_trimester  | Dupl | somatic or paternally inherited* |
| 3   | 41920334  | 42067669  | 147335 | normal term  | Del  | somatic                          |
| 3   | 42676265  | 42726064  | 49799  | normal term  | Dupl | somatic                          |
| 3   | 48606701  | 48628689  | 21988  | normal term  | Dupl | somatic                          |
| 3   | 49074502  | 49129625  | 55123  | normal term  | Del  | somatic                          |
| 3   | 49074502  | 49129625  | 55123  | LGA          | Del  | somatic                          |
| 3   | 51457332  | 51616334  | 159002 | normal term  | Del  | somatic                          |
| 3   | 51457332  | 51616334  | 159002 | normal term  | Del  | somatic                          |
| 3   | 51457332  | 51616334  | 159002 | LGA          | Del  | somatic                          |
| 3   | 51457332  | 51697493  | 240161 | LGA          | Del  | somatic                          |
| 3   | 51457332  | 51616334  | 159002 | II trimester | Del  | somatic or paternally inherited* |

| Chr | Start     | End       | Length | Group        | Type | Inherited/somatic                |
|-----|-----------|-----------|--------|--------------|------|----------------------------------|
| 3   | 51457332  | 51655856  | 198524 | II_trimester | Del  | somatic or paternally inherited* |
| 3   | 51457332  | 51655856  | 198524 | II_trimester | Del  | somatic or paternally inherited* |
| 3   | 51457332  | 51598254  | 140922 | I_trimester  | Del  | somatic or paternally inherited* |
| 3   | 51482527  | 51616334  | 133807 | PE           | Del  | somatic                          |
| 3   | 51482527  | 51577966  | 95439  | SGA          | Del  | somatic                          |
| 3   | 51482527  | 51616334  | 133807 | SGA          | Del  | somatic                          |
| 3   | 51482527  | 51616334  | 133807 | LGA          | Del  | somatic                          |
| 3   | 51482527  | 51623547  | 141020 | PE           | Del  | somatic                          |
| 3   | 51482527  | 51598254  | 115727 | II_trimester | Del  | somatic or paternally inherited* |
| 3   | 51482527  | 51704721  | 222194 | I_trimester  | Del  | somatic or paternally inherited* |
| 3   | 51527117  | 51697493  | 170376 | LGA          | Del  | somatic                          |
| 3   | 51527117  | 51598254  | 71137  | PE           | Del  | somatic                          |
| 3   | 53033295  | 53035044  | 1749   | LGA          | Del  | maternally/paternally inherited  |
| 3   | 53033295  | 53035044  | 1749   | LGA          | Del  | somatic                          |
| 3   | 57219344  | 57706177  | 486833 | normal term  | Del  | somatic                          |
| 3   | 65191847  | 65214685  | 22838  | normal term  | Del  | maternally inherited             |
| 3   | 65191847  | 65214685  | 22838  | PE           | Del  | paternally inherited             |
| 3   | 65191847  | 65202420  | 10573  | GD           | Del  | maternally/paternally inherited  |
| 3   | 65191847  | 65215804  | 23957  | II_trimester | Del  | maternally inherited             |
| 3   | 65191847  | 65214685  | 22838  | II_trimester | Del  | maternally inherited             |
| 3   | 65191847  | 65215804  | 23957  | I_trimester  | Del  | maternally inherited             |
| 3   | 65191847  | 65215804  | 23957  | normal term  | Del  | somatic                          |
| 3   | 65191847  | 65215804  | 23957  | SGA          | Del  | somatic                          |
| 3   | 65196123  | 65214685  | 18562  | GD           | Del  | maternally inherited             |
| 3   | 74548437  | 74577921  | 29484  | normal term  | Dupl | somatic                          |
| 3   | 77444432  | 77739202  | 294770 | II_trimester | Dupl | somatic or paternally inherited* |
| 3   | 77565186  | 77650799  | 85613  | normal term  | Dupl | somatic                          |
| 3   | 77565186  | 77650799  | 85613  | II_trimester | Dupl | somatic or paternally inherited* |
| 3   | 77565186  | 77650799  | 85613  | II_trimester | Dupl | somatic or paternally inherited* |
| 3   | 83130081  | 83305448  | 175367 | II_trimester | Dupl | somatic or paternally inherited* |
| 3   | 83130081  | 83305448  | 175367 | I_trimester  | Dupl | somatic or paternally inherited* |
| 3   | 89384565  | 89417171  | 32606  | I_trimester  | Del  | maternally inherited             |
| 3   | 89384565  | 89417171  | 32606  | LGA          | Del  | somatic                          |
| 3   | 95146114  | 95310843  | 164729 | GD           | Dupl | somatic                          |
| 3   | 98835121  | 98902911  | 67790  | GD           | Dupl | somatic                          |
| 3   | 98946071  | 98947275  | 1204   | SGA          | Del  | somatic                          |
| 3   | 100351696 | 100441716 | 90020  | PE           | Dupl | paternally inherited             |
| 3   | 102529319 | 102609928 | 80609  | SGA          | Dupl | somatic                          |
| 3   | 102529319 | 102651365 | 122046 | II_trimester | Dupl | somatic or paternally inherited* |
| 3   | 103097277 | 103126594 | 29317  | LGA          | Dupl | somatic or paternally inherited* |
| 3   | 103097277 | 103140700 | 43423  | II_trimester | Dupl | somatic or paternally inherited* |
| 3   | 108962866 | 109182586 | 219720 | normal term  | Del  | somatic                          |
| 3   | 125886358 | 125973658 | 87300  | II_trimester | Dupl | parental data not available      |
| 3   | 125887641 | 125978418 | 90777  | I_trimester  | Dupl | parental data not available      |
| 3   | 125887641 | 125978418 | 90777  | normal term  | Dupl | somatic                          |
| 3   | 125887641 | 125978418 | 90777  | GD           | Dupl | somatic                          |
| 3   | 125887641 | 125970734 | 83093  | I trimester  | Dupl | somatic or paternally inherited* |

| Chr | Start     | End       | Length | Group        | Type | Inherited/somatic                |
|-----|-----------|-----------|--------|--------------|------|----------------------------------|
| 3   | 125887641 | 125970734 | 83093  | I_trimester  | Dupl | somatic or paternally inherited* |
| 3   | 125897537 | 125973658 | 76121  | SGA          | Dupl | somatic                          |
| 3   | 151514590 | 151546041 | 31451  | SGA          | Del  | maternally inherited             |
| 3   | 152737318 | 152872542 | 135224 | LGA          | Del  | somatic                          |
| 3   | 152737318 | 152894141 | 156823 | PE           | Del  | somatic                          |
| 3   | 154054799 | 154191674 | 136875 | GD           | Dupl | somatic                          |
| 3   | 162130691 | 162142475 | 11784  | SGA          | Del  | maternally inherited             |
| 3   | 162130691 | 162142475 | 11784  | PE           | Del  | paternally inherited             |
| 3   | 162130691 | 162142475 | 11784  | LGA          | Del  | maternally inherited             |
| 3   | 162130691 | 162156517 | 25826  | SGA          | Del  | somatic                          |
| 3   | 162130691 | 162142475 | 11784  | PE           | Del  | somatic                          |
| 3   | 162130691 | 162142475 | 11784  | PE           | Del  | somatic                          |
| 3   | 162507286 | 162650452 | 143166 | I_trimester  | Dupl | somatic or paternally inherited* |
| 3   | 165041116 | 165073006 | 31890  | PE           | Del  | maternally/paternally inherited  |
| 3   | 169838000 | 170128750 | 290750 | LGA          | Del  | somatic                          |
| 3   | 169857007 | 170128750 | 271743 | LGA          | Del  | somatic                          |
| 3   | 176758477 | 177127453 | 368976 | normal term  | Del  | somatic                          |
| 3   | 183393037 | 183503633 | 110596 | LGA          | Del  | somatic                          |
| 3   | 183432982 | 183503633 | 70651  | LGA          | Del  | somatic                          |
| 3   | 185234542 | 185314612 | 80070  | normal term  | Del  | somatic                          |
| 3   | 186461157 | 186494421 | 33264  | normal term  | Del  | somatic                          |
| 3   | 189364423 | 189366762 | 2339   | GD           | Del  | somatic                          |
| 3   | 189738195 | 189739056 | 861    | PE           | Del  | somatic                          |
| 3   | 189738195 | 189739056 | 861    | normal term  | Del  | somatic                          |
| 3   | 189738195 | 189739056 | 861    | normal term  | Del  | somatic                          |
| 3   | 189738195 | 189739056 | 861    | normal term  | Del  | somatic                          |
| 3   | 189738195 | 189739056 | 861    | SGA          | Del  | somatic                          |
| 3   | 189738195 | 189739056 | 861    | SGA          | Del  | somatic                          |
| 3   | 189738195 | 189739056 | 861    | PE           | Del  | somatic                          |
| 3   | 189738195 | 189739056 | 861    | GD           | Del  | somatic                          |
| 3   | 189738195 | 189739056 | 861    | II_trimester | Del  | somatic or paternally inherited* |
| 3   | 189738195 | 189739056 | 861    | I_trimester  | Del  | somatic or paternally inherited* |
| 3   | 189738195 | 189739056 | 861    | I_trimester  | Del  | somatic or paternally inherited* |
| 3   | 191065392 | 191069983 | 4591   | II_trimester | Del  | parental data not available      |
| 3   | 191065392 | 191069983 | 4591   | normal term  | Del  | somatic                          |
| 3   | 191065392 | 191069983 | 4591   | GD           | Del  | somatic                          |
| 3   | 191065392 | 191069983 | 4591   | I_trimester  | Del  | somatic or paternally inherited* |
| 3   | 196533319 | 196617207 | 83888  | normal term  | Del  | somatic                          |
| 3   | 196533319 | 196641105 | 107786 | II_trimester | Del  | somatic or paternally inherited* |
| 4   | 821490    | 1054867   | 233377 | normal term  | Dupl | somatic                          |
| 4   | 2235690   | 2304007   | 68317  | LGA          | Dupl | somatic                          |
| 4   | 3186993   | 3875234   | 688241 | normal term  | Dupl | somatic                          |
| 4   | 5074816   | 5110140   | 35324  | I_trimester  | Dupl | somatic or paternally inherited* |
| 4   | 10396709  | 10400156  | 3447   | normal term  | Del  | maternally inherited             |
| 4   | 10396709  | 10400156  | 3447   | SGA          | Del  | somatic                          |
| 4   | 10396709  | 10400156  | 3447   | PE           | Del  | somatic                          |
| 4   | 16413099  | 16428830  | 15731  | SGA          | Del  | maternally inherited             |

| Chr | Start     | End       | Length | Group        | Type | Inherited/somatic                |
|-----|-----------|-----------|--------|--------------|------|----------------------------------|
| 4   | 16413099  | 16428830  | 15731  | PE           | Del  | somatic                          |
| 4   | 20271773  | 20458688  | 186915 | SGA          | Dupl | somatic                          |
| 4   | 20362716  | 20455955  | 93239  | I_trimester  | Dupl | parental data not available      |
| 4   | 20362716  | 20458688  | 95972  | GD           | Dupl | somatic                          |
| 4   | 22962472  | 23563103  | 600631 | GD           | Dupl | maternally inherited             |
| 4   | 25028158  | 25475510  | 447352 | GD           | Dupl | maternally inherited             |
| 4   | 32345711  | 32558700  | 212989 | II_trimester | Dupl | somatic or paternally inherited* |
| 4   | 32398607  | 32558700  | 160093 | normal term  | Dupl | somatic                          |
| 4   | 32428642  | 32558700  | 130058 | normal term  | Dupl | somatic                          |
| 4   | 32428642  | 32558700  | 130058 | SGA          | Dupl | somatic                          |
| 4   | 32428642  | 32558700  | 130058 | SGA          | Dupl | somatic                          |
| 4   | 32428642  | 32558700  | 130058 | GD           | Dupl | somatic                          |
| 4   | 32428642  | 32577729  | 149087 | I_trimester  | Dupl | somatic or paternally inherited* |
| 4   | 32446724  | 32495165  | 48441  | II_trimester | Dupl | parental data not available      |
| 4   | 32446724  | 32495165  | 48441  | normal term  | Dupl | somatic                          |
| 4   | 34520176  | 34910052  | 389876 | I_trimester  | Dupl | somatic or paternally inherited* |
| 4   | 45982196  | 46055477  | 73281  | SGA          | Dupl | somatic                          |
| 4   | 57690713  | 57766052  | 75339  | PE           | Del  | somatic                          |
| 4   | 64138341  | 64150666  | 12325  | GD           | Del  | maternally inherited             |
| 4   | 66110164  | 66340967  | 230803 | LGA          | Dupl | somatic                          |
| 4   | 69678678  | 69706272  | 27594  | normal term  | Dupl | somatic                          |
| 4   | 70592242  | 70600256  | 8014   | PE           | Dupl | somatic                          |
| 4   | 70795699  | 71069004  | 273305 | II_trimester | Dupl | parental data not available      |
| 4   | 70917031  | 71045118  | 128087 | II_trimester | Dupl | somatic or paternally inherited* |
| 4   | 71552305  | 72040650  | 488345 | LGA          | Del  | somatic                          |
| 4   | 74254678  | 74313193  | 58515  | normal term  | Dupl | somatic                          |
| 4   | 80539001  | 80645990  | 106989 | LGA          | Dupl | somatic                          |
| 4   | 92151187  | 92185714  | 34527  | GD           | Dupl | somatic                          |
| 4   | 92151187  | 92185714  | 34527  | GD           | Dupl | somatic                          |
| 4   | 93740408  | 93969165  | 228757 | GD           | Del  | paternally inherited             |
| 4   | 96255088  | 96456602  | 201514 | normal term  | Dupl | somatic                          |
| 4   | 96262520  | 96456602  | 194082 | I_trimester  | Dupl | somatic or paternally inherited* |
| 4   | 99534928  | 99617267  | 82339  | II_trimester | Dupl | parental data not available      |
| 4   | 100326402 | 100334943 | 8541   | I_trimester  | Dupl | parental data not available      |
| 4   | 102094764 | 102199215 | 104451 | II_trimester | Dupl | somatic or paternally inherited* |
| 4   | 102714886 | 102988188 | 273302 | II_trimester | Dupl | somatic or paternally inherited* |
| 4   | 108145936 | 108239396 | 93460  | PE           | Dupl | somatic                          |
| 4   | 108195600 | 108239396 | 43796  | PE           | Dupl | somatic                          |
| 4   | 108195600 | 108239396 | 43796  | II_trimester | Dupl | somatic or paternally inherited* |
| 4   | 111734136 | 111739292 | 5156   | SGA          | Dupl | somatic                          |
| 4   | 122283522 | 122289862 | 6340   | GD           | Del  | paternally inherited             |
| 4   | 122283522 | 122289862 | 6340   | II_trimester | Del  | somatic or paternally inherited* |
| 4   | 122283522 | 122289862 | 6340   | I_trimester  | Del  | somatic or paternally inherited* |
| 4   | 126252650 | 126447899 | 195249 | normal term  | Dupl | somatic                          |
| 4   | 126252650 | 126447899 | 195249 | GD           | Dupl | somatic                          |
| 4   | 126252650 | 126280006 | 27356  | II_trimester | Dupl | somatic or paternally inherited* |
| 4   | 128723458 | 129029653 | 306195 | LGA          | Del  | somatic                          |

| Chr | Start     | End       | Length | Group        | Type | Inherited/somatic                |
|-----|-----------|-----------|--------|--------------|------|----------------------------------|
| 4   | 131539495 | 131561136 | 21641  | II_trimester | Dupl | somatic or paternally inherited* |
| 4   | 132051076 | 132257490 | 206414 | normal term  | Dupl | somatic                          |
| 4   | 137542931 | 137718455 | 175524 | normal term  | Dupl | somatic                          |
| 4   | 137542931 | 137720486 | 177555 | normal term  | Dupl | somatic                          |
| 4   | 137542931 | 137718455 | 175524 | normal term  | Dupl | somatic                          |
| 4   | 137542931 | 137698875 | 155944 | SGA          | Dupl | somatic                          |
| 4   | 137542931 | 137828866 | 285935 | PE           | Dupl | somatic                          |
| 4   | 137542931 | 137714170 | 171239 | GD           | Dupl | somatic                          |
| 4   | 137542931 | 137718455 | 175524 | II_trimester | Dupl | somatic or paternally inherited* |
| 4   | 137542931 | 137720486 | 177555 | II_trimester | Dupl | somatic or paternally inherited* |
| 4   | 137542931 | 137718455 | 175524 | I_trimester  | Dupl | somatic or paternally inherited* |
| 4   | 137542931 | 137718455 | 175524 | I_trimester  | Dupl | somatic or paternally inherited* |
| 4   | 137567044 | 137720486 | 153442 | II_trimester | Dupl | parental data not available      |
| 4   | 138093809 | 138097449 | 3640   | PE           | Del  | somatic                          |
| 4   | 138093809 | 138097449 | 3640   | GD           | Del  | somatic                          |
| 4   | 146025645 | 146073143 | 47498  | normal term  | Dupl | somatic                          |
| 4   | 146025645 | 146139896 | 114251 | normal term  | Dupl | somatic                          |
| 4   | 146025645 | 146055117 | 29472  | SGA          | Dupl | somatic                          |
| 4   | 146025645 | 146061560 | 35915  | SGA          | Dupl | somatic                          |
| 4   | 146025645 | 146061560 | 35915  | GD           | Dupl | somatic                          |
| 4   | 146025645 | 146082942 | 57297  | II_trimester | Dupl | somatic or paternally inherited* |
| 4   | 150634191 | 150845428 | 211237 | PE           | Dupl | somatic                          |
| 4   | 151901433 | 152039963 | 138530 | normal term  | Del  | somatic                          |
| 4   | 152790580 | 152792791 | 2211   | normal term  | Del  | somatic                          |
| 4   | 152790580 | 152792791 | 2211   | II_trimester | Del  | somatic or paternally inherited* |
| 4   | 153229867 | 153388854 | 158987 | normal term  | Dupl | somatic                          |
| 4   | 156963692 | 156967385 | 3693   | SGA          | Del  | somatic                          |
| 4   | 161058055 | 161071059 | 13004  | GD           | Del  | maternally inherited             |
| 4   | 161058055 | 161071059 | 13004  | I_trimester  | Del  | somatic or paternally inherited* |
| 4   | 161881000 | 161884036 | 3036   | LGA          | Del  | somatic                          |
| 4   | 162350385 | 162458688 | 108303 | normal term  | Dupl | somatic                          |
| 4   | 168366518 | 168391333 | 24815  | II_trimester | Dupl | somatic or paternally inherited* |
| 4   | 172943891 | 172957428 | 13537  | normal term  | Dupl | somatic                          |
| 4   | 180982097 | 181108510 | 126413 | normal term  | Dupl | somatic                          |
| 4   | 182377628 | 182413696 | 36068  | II_trimester | Dupl | somatic or paternally inherited* |
| 5   | 3163438   | 3194690   | 31252  | normal term  | Dupl | somatic                          |
| 5   | 3166087   | 3194690   | 28603  | II_trimester | Dupl | parental data not available      |
| 5   | 3166087   | 3181008   | 14921  | normal term  | Dupl | somatic                          |
| 5   | 7178644   | 7191074   | 12430  | LGA          | Del  | paternally inherited             |
| 5   | 7179551   | 7191074   | 11523  | normal term  | Del  | paternally inherited             |
| 5   | 7843211   | 7920843   | 77632  | LGA          | Dupl | somatic                          |
| 5   | 7843211   | 7946262   | 103051 | I_trimester  | Dupl | somatic or paternally inherited* |
| 5   | 7859433   | 7927160   | 67727  | normal term  | Dupl | somatic                          |
| 5   | 7885226   | 7920843   | 35617  | PE           | Dupl | somatic                          |
| 5   | 8836536   | 8862668   | 26132  | normal term  | Dupl | somatic                          |
| 5   | 8836536   | 8860434   | 23898  | LGA          | Dupl | somatic                          |
| 5   | 9902403   | 9924597   | 22194  | PE           | Del  | maternally inherited             |

| Chr | Start    | End      | Length  | Group        | Type | Inherited/somatic                |
|-----|----------|----------|---------|--------------|------|----------------------------------|
| 5   | 9902403  | 9924597  | 22194   | SGA          | Del  | maternally inherited             |
| 5   | 18799045 | 18895407 | 96362   | normal term  | Dupl | maternally inherited             |
| 5   | 24779565 | 24806889 | 27324   | II_trimester | Dupl | parental data not available      |
| 5   | 24779565 | 24806889 | 27324   | normal term  | Dupl | somatic                          |
| 5   | 24779565 | 24806889 | 27324   | SGA          | Dupl | somatic                          |
| 5   | 24779565 | 24806889 | 27324   | GD           | Dupl | somatic                          |
| 5   | 25676606 | 25737864 | 61258   | GD           | Dupl | somatic                          |
| 5   | 25676606 | 25739983 | 63377   | GD           | Dupl | somatic                          |
| 5   | 25687036 | 25723615 | 36579   | normal term  | Dupl | somatic                          |
| 5   | 25687036 | 25739983 | 52947   | SGA          | Dupl | somatic                          |
| 5   | 25698030 | 25723615 | 25585   | LGA          | Dupl | somatic or paternally inherited* |
| 5   | 25976806 | 26196559 | 219753  | GD           | Dupl | somatic                          |
| 5   | 34052480 | 34402152 | 349672  | LGA          | Dupl | somatic                          |
| 5   | 34052480 | 34389859 | 337379  | LGA          | Dupl | somatic                          |
| 5   | 34107121 | 34428293 | 321172  | normal term  | Dupl | somatic                          |
| 5   | 34107121 | 34389859 | 282738  | SGA          | Dupl | somatic                          |
| 5   | 34107121 | 34389859 | 282738  | SGA          | Dupl | somatic                          |
| 5   | 34107121 | 34389859 | 282738  | LGA          | Dupl | somatic                          |
| 5   | 34107121 | 34190148 | 83027   | PE           | Dupl | somatic                          |
| 5   | 34107121 | 34452193 | 345072  | PE           | Dupl | somatic                          |
| 5   | 34107121 | 34190148 | 83027   | PE           | Dupl | somatic                          |
| 5   | 34107121 | 34428293 | 321172  | PE           | Dupl | somatic                          |
| 5   | 34107121 | 34389859 | 282738  | I_trimester  | Dupl | somatic or paternally inherited* |
| 5   | 34107121 | 34389859 | 282738  | I_trimester  | Dupl | somatic or paternally inherited* |
| 5   | 39105593 | 39132459 | 26866   | SGA          | Dupl | somatic                          |
| 5   | 39105593 | 39124016 | 18423   | I_trimester  | Dupl | somatic or paternally inherited* |
| 5   | 39113637 | 39132459 | 18822   | normal term  | Dupl | somatic                          |
| 5   | 39113637 | 39124016 | 10379   | normal term  | Dupl | somatic                          |
| 5   | 40865863 | 40974004 | 108141  | I_trimester  | Del  | somatic or paternally inherited* |
| 5   | 43704556 | 44517392 | 812836  | LGA          | Dupl | somatic                          |
| 5   | 44313150 | 44517392 | 204242  | normal term  | Dupl | somatic                          |
| 5   | 44351153 | 44517392 | 166239  | II_trimester | Dupl | somatic or paternally inherited* |
| 5   | 44499291 | 44517392 | 18101   | GD           | Dupl | somatic                          |
| 5   | 44499291 | 44517392 | 18101   | LGA          | Dupl | somatic or paternally inherited* |
| 5   | 44499291 | 44517392 | 18101   | I_trimester  | Dupl | somatic or paternally inherited* |
| 5   | 44513809 | 44517392 | 3583    | LGA          | Dupl | somatic                          |
| 5   | 56215752 | 56259853 | 44101   | I_trimester  | Dupl | somatic or paternally inherited* |
| 5   | 66348322 | 66403500 | 55178   | II_trimester | Dupl | somatic or paternally inherited* |
| 5   | 66348322 | 66406143 | 57821   | I_trimester  | Dupl | somatic or paternally inherited* |
| 5   | 68826788 | 70307464 | 1480676 | GD           | Del  | somatic                          |
| 5   | 70305696 | 70307464 | 1768    | normal term  | Del  | somatic                          |
| 5   | 78421958 | 78532658 | 110700  | normal term  | Del  | somatic                          |
| 5   | 78421958 | 78629346 | 207388  | PE           | Del  | somatic                          |
| 5   | 78829154 | 78909324 | 80170   | II_trimester | Del  | somatic or paternally inherited* |
| 5   | 78848000 | 78909324 | 61324   | normal term  | Del  | somatic                          |
| 5   | 78853921 | 78909324 | 55403   | LGA          | Del  | somatic                          |
| 5   | 83224173 | 83271937 | 47764   | II_trimester | Dupl | parental data not available      |



| Chr | Start     | End       | Length | Group        | Type | Inherited/somatic                |
|-----|-----------|-----------|--------|--------------|------|----------------------------------|
| 5   | 83224173  | 83260938  | 36765  | PE           | Dupl | somatic                          |
| 5   | 84177145  | 84322004  | 144859 | GD           | Dupl | somatic                          |
| 5   | 84177145  | 84281179  | 104034 | I_trimester  | Dupl | somatic or paternally inherited* |
| 5   | 93788056  | 93864514  | 76458  | II_trimester | Dupl | parental data not available      |
| 5   | 94191436  | 94239189  | 47753  | normal term  | Dupl | somatic                          |
| 5   | 97047653  | 97111523  | 63870  | LGA          | Del  | maternally inherited             |
| 5   | 97048466  | 97099320  | 50854  | LGA          | Del  | maternally inherited             |
| 5   | 97048466  | 97111523  | 63057  | GD           | Del  | paternally inherited             |
| 5   | 97048466  | 97099320  | 50854  | II_trimester | Del  | maternally inherited             |
| 5   | 97048466  | 97099320  | 50854  | I_trimester  | Del  | maternally inherited             |
| 5   | 97933888  | 97939616  | 5728   | I_trimester  | Del  | maternally inherited             |
| 5   | 97933888  | 97939616  | 5728   | II_trimester | Del  | somatic or paternally inherited* |
| 5   | 99597529  | 99627951  | 30422  | LGA          | Del  | maternally inherited             |
| 5   | 100604495 | 100611918 | 7423   | normal term  | Dupl | somatic                          |
| 5   | 104025707 | 104845257 | 819550 | I_trimester  | Dupl | somatic or paternally inherited* |
| 5   | 106211190 | 106256408 | 45218  | SGA          | Del  | paternally inherited             |
| 5   | 109358981 | 109384306 | 25325  | SGA          | Del  | maternally inherited             |
| 5   | 109358981 | 109384306 | 25325  | SGA          | Del  | paternally inherited             |
| 5   | 110427347 | 110467237 | 39890  | normal term  | Dupl | somatic                          |
| 5   | 113874136 | 113986223 | 112087 | PE           | Del  | maternally inherited             |
| 5   | 118225616 | 118534517 | 308901 | LGA          | Del  | somatic                          |
| 5   | 124843659 | 124871683 | 28024  | II_trimester | Dupl | somatic or paternally inherited* |
| 5   | 124843659 | 124875058 | 31399  | I_trimester  | Dupl | somatic or paternally inherited* |
| 5   | 125879549 | 126095011 | 215462 | normal term  | Del  | somatic                          |
| 5   | 125879549 | 126161748 | 282199 | II_trimester | Del  | somatic or paternally inherited* |
| 5   | 125897227 | 126130100 | 232873 | LGA          | Del  | somatic                          |
| 5   | 125943743 | 126172194 | 228451 | LGA          | Del  | somatic                          |
| 5   | 125946011 | 126135382 | 189371 | normal term  | Del  | somatic                          |
| 5   | 133741881 | 134258183 | 516302 | normal term  | Del  | somatic                          |
| 5   | 133959630 | 134189243 | 229613 | PE           | Del  | somatic                          |
| 5   | 137537724 | 137631073 | 93349  | PE           | Del  | somatic                          |
| 5   | 140165568 | 140264639 | 99071  | normal term  | Dupl | somatic                          |
| 5   | 140165568 | 140246287 | 80719  | normal term  | Dupl | somatic                          |
| 5   | 140165568 | 140246511 | 80943  | normal term  | Dupl | somatic                          |
| 5   | 140165568 | 140264639 | 99071  | SGA          | Dupl | somatic                          |
| 5   | 140165568 | 140253787 | 88219  | SGA          | Dupl | somatic                          |
| 5   | 140165568 | 140253787 | 88219  | PE           | Dupl | somatic                          |
| 5   | 142762977 | 142780485 | 17508  | normal term  | Dupl | somatic                          |
| 5   | 142767739 | 142786700 | 18961  | LGA          | Dupl | somatic                          |
| 5   | 142767739 | 142786700 | 18961  | PE           | Dupl | somatic                          |
| 5   | 142770134 | 142786700 | 16566  | PE           | Dupl | somatic                          |
| 5   | 151514956 | 151518809 | 3853   | GD           | Del  | somatic                          |
| 5   | 155477866 | 155488438 | 10572  | LGA          | Del  | somatic                          |
| 5   | 155477866 | 155488438 | 10572  | GD           | Del  | somatic                          |
| 5   | 163348798 | 163357967 | 9169   | LGA          | Dupl | somatic                          |
| 5   | 163348798 | 163357967 | 9169   | SGA          | Dupl | somatic or paternally inherited* |
| 5   | 169460787 | 169472788 | 12001  | PE           | Dupl | somatic                          |

| Chr | Start     | End       | Length | Group        | Type | Inherited/somatic                |
|-----|-----------|-----------|--------|--------------|------|----------------------------------|
| 5   | 172395581 | 172562142 | 166561 | LGA          | Del  | somatic                          |
| 5   | 176541936 | 176700884 | 158948 | LGA          | Del  | somatic                          |
| 5   | 176569187 | 176724056 | 154869 | LGA          | Del  | somatic                          |
| 5   | 177661902 | 177747691 | 85789  | LGA          | Dupl | somatic                          |
| 5   | 178557142 | 178785054 | 227912 | II_trimester | Dupl | somatic or paternally inherited* |
| 6   | 19045560  | 19048773  | 3213   | I_trimester  | Del  | somatic or paternally inherited* |
| 6   | 22677767  | 22701495  | 23728  | II_trimester | Dupl | somatic or paternally inherited* |
| 6   | 29094695  | 29168841  | 74146  | LGA          | Del  | maternally inherited             |
| 6   | 31219869  | 31228971  | 9102   | GD           | Del  | paternally inherited             |
| 6   | 31276609  | 31277987  | 1378   | GD           | Del  | somatic                          |
| 6   | 31276609  | 31277987  | 1378   | II_trimester | Del  | somatic or paternally inherited* |
| 6   | 31281770  | 31285291  | 3521   | SGA          | Del  | somatic                          |
| 6   | 31360254  | 31454364  | 94110  | PE           | Dupl | paternally inherited             |
| 6   | 31682029  | 31706473  | 24444  | II_trimester | Dupl | somatic or paternally inherited* |
| 6   | 31682029  | 31706473  | 24444  | II_trimester | Dupl | somatic or paternally inherited* |
| 6   | 31892483  | 32070837  | 178354 | normal term  | Dupl | somatic                          |
| 6   | 31895215  | 32044850  | 149635 | LGA          | Dupl | somatic                          |
| 6   | 31919577  | 32017539  | 97962  | PE           | Dupl | somatic                          |
| 6   | 31974848  | 31997053  | 22205  | II_trimester | Del  | somatic or paternally inherited* |
| 6   | 31974848  | 31997053  | 22205  | I_trimester  | Del  | somatic or paternally inherited* |
| 6   | 32193219  | 32246156  | 52937  | II_trimester | Del  | somatic or paternally inherited* |
| 6   | 32501715  | 32519004  | 17289  | GD           | Del  | somatic                          |
| 6   | 32501715  | 32519004  | 17289  | I_trimester  | Del  | somatic or paternally inherited* |
| 6   | 32638315  | 32640336  | 2021   | GD           | Del  | somatic                          |
| 6   | 33588146  | 33791515  | 203369 | PE           | Dupl | somatic                          |
| 6   | 33601132  | 33794258  | 193126 | PE           | Dupl | somatic                          |
| 6   | 33601132  | 33794258  | 193126 | II_trimester | Dupl | somatic or paternally inherited* |
| 6   | 33613344  | 33794258  | 180914 | II_trimester | Dupl | somatic or paternally inherited* |
| 6   | 33659793  | 33791515  | 131722 | II_trimester | Dupl | somatic or paternally inherited* |
| 6   | 43911551  | 44046143  | 134592 | LGA          | Dupl | somatic                          |
| 6   | 45295124  | 45349509  | 54385  | II_trimester | Dupl | somatic or paternally inherited* |
| 6   | 55776584  | 56253790  | 477206 | normal term  | Del  | paternally inherited             |
| 6   | 67017494  | 67044431  | 26937  | PE           | Del  | paternally inherited             |
| 6   | 67017494  | 67044431  | 26937  | I_trimester  | Del  | somatic or paternally inherited* |
| 6   | 67095924  | 67270731  | 174807 | II_trimester | Dupl | somatic or paternally inherited* |
| 6   | 67621368  | 67656128  | 34760  | LGA          | Dupl | somatic                          |
| 6   | 67621368  | 67656128  | 34760  | II_trimester | Dupl | somatic or paternally inherited* |
| 6   | 70919443  | 70923469  | 4026   | II_trimester | Dupl | somatic or paternally inherited* |
| 6   | 75825181  | 75840120  | 14939  | PE           | Dupl | somatic                          |
| 6   | 75826134  | 75840120  | 13986  | normal term  | Dupl | somatic                          |
| 6   | 75826134  | 75840120  | 13986  | II_trimester | Dupl | somatic or paternally inherited* |
| 6   | 77439969  | 77448731  | 8762   | SGA          | Del  | somatic                          |
| 6   | 77439969  | 77448731  | 8762   | PE           | Del  | somatic                          |
| 6   | 77439969  | 77448731  | 8762   | PE           | Del  | somatic                          |
| 6   | 77439969  | 77448731  | 8762   | GD           | Del  | somatic                          |
| 6   | 77439969  | 77448731  | 8762   | GD           | Del  | somatic                          |
| 6   | 77439969  | 77448731  | 8762   | I_trimester  | Del  | somatic or paternally inherited* |

| Chr | Start     | End       | Length | Group        | Type | Inherited/somatic                |
|-----|-----------|-----------|--------|--------------|------|----------------------------------|
| 6   | 78972930  | 79029367  | 56437  | normal term  | Del  | somatic                          |
| 6   | 78972930  | 79029367  | 56437  | II_trimester | Del  | somatic or paternally inherited* |
| 6   | 78972930  | 79029367  | 56437  | II_trimester | Del  | somatic or paternally inherited* |
| 6   | 78972930  | 79029367  | 56437  | II_trimester | Del  | somatic or paternally inherited* |
| 6   | 78972930  | 79029367  | 56437  | I_trimester  | Del  | somatic or paternally inherited* |
| 6   | 78975090  | 79029367  | 54277  | normal term  | Dupl | somatic                          |
| 6   | 78975090  | 79047537  | 72447  | normal term  | Dupl | somatic                          |
| 6   | 78979398  | 79042990  | 63592  | normal term  | Dupl | somatic                          |
| 6   | 78979398  | 79078738  | 99340  | LGA          | Dupl | somatic                          |
| 6   | 78979398  | 79029367  | 49969  | I_trimester  | Dupl | somatic or paternally inherited* |
| 6   | 90476276  | 90631504  | 155228 | LGA          | Del  | somatic                          |
| 6   | 93752014  | 93859659  | 107645 | normal term  | Dupl | somatic                          |
| 6   | 93950566  | 94120638  | 170072 | PE           | Dupl | somatic                          |
| 6   | 93950566  | 94133927  | 183361 | normal term  | Dupl | somatic                          |
| 6   | 93950566  | 94130024  | 179458 | GD           | Dupl | somatic                          |
| 6   | 93950566  | 94130024  | 179458 | SGA          | Dupl | somatic or paternally inherited* |
| 6   | 93950566  | 94120638  | 170072 | II_trimester | Dupl | somatic or paternally inherited* |
| 6   | 93950566  | 94120638  | 170072 | II_trimester | Dupl | somatic or paternally inherited* |
| 6   | 93950566  | 94120638  | 170072 | I_trimester  | Dupl | somatic or paternally inherited* |
| 6   | 93956769  | 94130024  | 173255 | II_trimester | Dupl | somatic or paternally inherited* |
| 6   | 93959361  | 94130024  | 170663 | II_trimester | Dupl | parental data not available      |
| 6   | 93959361  | 94117546  | 158185 | SGA          | Dupl | somatic                          |
| 6   | 93959361  | 94120638  | 161277 | SGA          | Dupl | somatic                          |
| 6   | 93959361  | 94117546  | 158185 | GD           | Dupl | somatic                          |
| 6   | 93959361  | 94117546  | 158185 | GD           | Dupl | somatic                          |
| 6   | 93959361  | 94130024  | 170663 | II_trimester | Dupl | somatic or paternally inherited* |
| 6   | 93961571  | 94117546  | 155975 | normal term  | Dupl | somatic                          |
| 6   | 93961571  | 94117546  | 155975 | normal term  | Dupl | somatic                          |
| 6   | 93961571  | 94120638  | 159067 | LGA          | Dupl | somatic                          |
| 6   | 93961571  | 94120638  | 159067 | GD           | Dupl | somatic                          |
| 6   | 93965265  | 94120638  | 155373 | normal term  | Dupl | somatic                          |
| 6   | 93965265  | 94120638  | 155373 | II_trimester | Dupl | somatic or paternally inherited* |
| 6   | 101891573 | 101953555 | 61982  | normal term  | Dupl | somatic                          |
| 6   | 101891573 | 101990259 | 98686  | SGA          | Dupl | somatic                          |
| 6   | 101927337 | 101959098 | 31761  | normal term  | Dupl | somatic                          |
| 6   | 107328319 | 107351798 | 23479  | normal term  | Del  | somatic                          |
| 6   | 110969521 | 111415640 | 446119 | LGA          | Del  | somatic                          |
| 6   | 111081133 | 111394638 | 313505 | PE           | Del  | somatic                          |
| 6   | 112135225 | 112203035 | 67810  | I_trimester  | Dupl | somatic or paternally inherited* |
| 6   | 112152560 | 112170222 | 17662  | I_trimester  | Dupl | somatic or paternally inherited* |
| 6   | 133732404 | 133847876 | 115472 | PE           | Dupl | somatic                          |
| 6   | 133763905 | 133817456 | 53551  | normal term  | Dupl | somatic                          |
| 6   | 134516019 | 134627600 | 111581 | LGA          | Del  | somatic                          |
| 6   | 139603744 | 139606731 | 2987   | I_trimester  | Del  | somatic or paternally inherited* |
| 6   | 146204066 | 146271476 | 67410  | normal term  | Dupl | somatic                          |
| 6   | 146204066 | 146271476 | 67410  | II_trimester | Dupl | somatic or paternally inherited* |
| 6   | 147551381 | 147730324 | 178943 | II_trimester | Dupl | somatic or paternally inherited* |

| Chr | Start     | End       | Length | Group        | Type | Inherited/somatic                |
|-----|-----------|-----------|--------|--------------|------|----------------------------------|
| 6   | 147566285 | 147723577 | 157292 | normal term  | Dupl | somatic                          |
| 6   | 147568513 | 147709180 | 140667 | GD           | Dupl | somatic                          |
| 6   | 147568513 | 147709180 | 140667 | I_trimester  | Dupl | somatic or paternally inherited* |
| 6   | 147635547 | 147709180 | 73633  | SGA          | Dupl | somatic                          |
| 6   | 149913867 | 150102785 | 188918 | normal term  | Del  | somatic                          |
| 6   | 160779134 | 160892241 | 113107 | PE           | Dupl | somatic                          |
| 6   | 160784836 | 160911053 | 126217 | LGA          | Dupl | somatic                          |
| 6   | 160790352 | 160854138 | 63786  | PE           | Dupl | somatic                          |
| 6   | 160795738 | 160854138 | 58400  | GD           | Dupl | somatic                          |
| 6   | 160795738 | 160872150 | 76412  | II_trimester | Dupl | somatic or paternally inherited* |
| 6   | 160796565 | 160854138 | 57573  | II_trimester | Dupl | parental data not available      |
| 6   | 160802238 | 160897872 | 95634  | normal term  | Dupl | somatic                          |
| 6   | 160802238 | 160865055 | 62817  | II_trimester | Dupl | somatic or paternally inherited* |
| 6   | 160810124 | 160897872 | 87748  | I_trimester  | Dupl | somatic or paternally inherited* |
| 6   | 160810124 | 160865055 | 54931  | I_trimester  | Dupl | somatic or paternally inherited* |
| 6   | 160812187 | 160865055 | 52868  | normal term  | Dupl | somatic                          |
| 6   | 160812187 | 160854138 | 41951  | II_trimester | Dupl | somatic or paternally inherited* |
| 6   | 164186315 | 164214737 | 28422  | I_trimester  | Dupl | parental data not available      |
| 6   | 169334481 | 169387386 | 52905  | normal term  | Dupl | somatic                          |
| 6   | 170070723 | 170140184 | 69461  | II_trimester | Dupl | parental data not available      |
| 6   | 170070723 | 170140184 | 69461  | I_trimester  | Dupl | somatic or paternally inherited* |
| 6   | 170099397 | 170140184 | 40787  | I_trimester  | Dupl | parental data not available      |
| 6   | 170099397 | 170162537 | 63140  | SGA          | Dupl | somatic                          |
| 6   | 170101841 | 170140184 | 38343  | I_trimester  | Dupl | somatic or paternally inherited* |
| 7   | 1473468   | 1536717   | 63249  | normal term  | Dupl | somatic                          |
| 7   | 1882227   | 2212758   | 330531 | normal term  | Dupl | somatic                          |
| 7   | 2649673   | 2703652   | 53979  | LGA          | Dupl | somatic                          |
| 7   | 6316798   | 6422555   | 105757 | normal term  | Del  | somatic                          |
| 7   | 6339313   | 6447990   | 108677 | II_trimester | Del  | somatic or paternally inherited* |
| 7   | 9128070   | 9229882   | 101812 | normal term  | Del  | maternally inherited             |
| 7   | 11677088  | 11753281  | 76193  | normal term  | Dupl | somatic                          |
| 7   | 11677840  | 11759464  | 81624  | SGA          | Dupl | somatic                          |
| 7   | 11677840  | 11753281  | 75441  | GD           | Dupl | somatic                          |
| 7   | 11677840  | 11753281  | 75441  | LGA          | Dupl | somatic or paternally inherited* |
| 7   | 11678246  | 11759464  | 81218  | GD           | Dupl | somatic                          |
| 7   | 11678246  | 11753281  | 75035  | II_trimester | Dupl | somatic or paternally inherited* |
| 7   | 12543120  | 12547917  | 4797   | SGA          | Del  | somatic                          |
| 7   | 13185882  | 13459064  | 273182 | normal term  | Dupl | somatic                          |
| 7   | 13185882  | 13522169  | 336287 | GD           | Dupl | somatic                          |
| 7   | 13190920  | 13511472  | 320552 | normal term  | Dupl | somatic                          |
| 7   | 13429017  | 13445967  | 16950  | PE           | Dupl | somatic                          |
| 7   | 13433240  | 13450842  | 17602  | normal term  | Dupl | somatic                          |
| 7   | 13433240  | 13445967  | 12727  | GD           | Dupl | somatic                          |
| 7   | 13439084  | 13520443  | 81359  | LGA          | Dupl | somatic                          |
| 7   | 17425895  | 17458078  | 32183  | normal term  | Del  | maternally inherited             |
| 7   | 23539546  | 23637416  | 97870  | LGA          | Del  | somatic                          |
| 7   | 27118974  | 27243221  | 124247 | normal term  | Dupl | somatic                          |

| Chr | Start     | End       | Length | Group        | Type | Inherited/somatic                |
|-----|-----------|-----------|--------|--------------|------|----------------------------------|
| 7   | 39962863  | 40314164  | 351301 | LGA          | Del  | somatic                          |
| 7   | 48310166  | 48318810  | 8644   | II_trimester | Dupl | parental data not available      |
| 7   | 48310166  | 48318810  | 8644   | PE           | Dupl | somatic                          |
| 7   | 48310166  | 48318810  | 8644   | normal term  | Dupl | somatic                          |
| 7   | 48310166  | 48318810  | 8644   | SGA          | Dupl | somatic                          |
| 7   | 48310166  | 48318810  | 8644   | SGA          | Dupl | somatic                          |
| 7   | 48310166  | 48318810  | 8644   | LGA          | Dupl | somatic                          |
| 7   | 48310166  | 48318810  | 8644   | GD           | Dupl | somatic                          |
| 7   | 48310166  | 48318810  | 8644   | GD           | Dupl | somatic                          |
| 7   | 48310166  | 48318810  | 8644   | II_trimester | Dupl | somatic or paternally inherited* |
| 7   | 48310166  | 48318810  | 8644   | II_trimester | Dupl | somatic or paternally inherited* |
| 7   | 57453615  | 57621951  | 168336 | PE           | Dupl | maternally inherited             |
| 7   | 57520410  | 57642390  | 121980 | GD           | Dupl | somatic                          |
| 7   | 57520410  | 57787663  | 267253 | II_trimester | Dupl | somatic or paternally inherited* |
| 7   | 57520410  | 57642390  | 121980 | II_trimester | Dupl | somatic or paternally inherited* |
| 7   | 61994170  | 62203030  | 208860 | I_trimester  | Del  | maternally inherited             |
| 7   | 61994170  | 62458262  | 464092 | normal term  | Del  | somatic                          |
| 7   | 61994170  | 62531632  | 537462 | LGA          | Del  | somatic                          |
| 7   | 61994170  | 62527743  | 533573 | PE           | Del  | somatic                          |
| 7   | 61994170  | 62458262  | 464092 | PE           | Del  | somatic                          |
| 7   | 61994170  | 62531632  | 537462 | I_trimester  | Del  | somatic or paternally inherited* |
| 7   | 62154874  | 62159926  | 5052   | LGA          | Del  | somatic                          |
| 7   | 62154874  | 62159926  | 5052   | I_trimester  | Del  | somatic or paternally inherited* |
| 7   | 62326772  | 62705018  | 378246 | PE           | Dupl | paternally inherited             |
| 7   | 65449716  | 65546062  | 96346  | LGA          | Del  | somatic                          |
| 7   | 65449716  | 65546062  | 96346  | II_trimester | Del  | somatic or paternally inherited* |
| 7   | 80211423  | 80307224  | 95801  | II_trimester | Dupl | parental data not available      |
| 7   | 80211423  | 80373728  | 162305 | I_trimester  | Dupl | somatic or paternally inherited* |
| 7   | 80223996  | 80307224  | 83228  | GD           | Dupl | somatic                          |
| 7   | 80709513  | 80739951  | 30438  | II_trimester | Dupl | somatic or paternally inherited* |
| 7   | 81737327  | 81824403  | 87076  | II_trimester | Dupl | somatic or paternally inherited* |
| 7   | 88560427  | 88582676  | 22249  | normal term  | Dupl | somatic                          |
| 7   | 88560427  | 88582676  | 22249  | PE           | Dupl | somatic                          |
| 7   | 88560427  | 88596821  | 36394  | LGA          | Dupl | somatic or paternally inherited* |
| 7   | 88568549  | 88580316  | 11767  | LGA          | Dupl | somatic                          |
| 7   | 89859977  | 89873767  | 13790  | II_trimester | Dupl | somatic or paternally inherited* |
| 7   | 97399028  | 97400870  | 1842   | PE           | Del  | somatic                          |
| 7   | 104786147 | 105205917 | 419770 | normal term  | Del  | somatic                          |
| 7   | 104896470 | 105076977 | 180507 | II_trimester | Del  | somatic or paternally inherited* |
| 7   | 104972800 | 105073788 | 100988 | normal term  | Del  | somatic                          |
| 7   | 105036690 | 105291444 | 254754 | PE           | Del  | somatic                          |
| 7   | 109441794 | 109451230 | 9436   | PE           | Del  | somatic                          |
| 7   | 109441794 | 109451230 | 9436   | normal term  | Del  | somatic                          |
| 7   | 109441794 | 109451230 | 9436   | normal term  | Del  | somatic                          |
| 7   | 109441794 | 109451230 | 9436   | PE           | Del  | somatic                          |
| 7   | 109441794 | 109451230 | 9436   | II_trimester | Del  | somatic or paternally inherited* |
| 7   | 109455705 | 109477177 | 21472  | PE           | Dupl | somatic                          |

| Chr | Start     | End       | Length | Group        | Type | Inherited/somatic                |
|-----|-----------|-----------|--------|--------------|------|----------------------------------|
| 7   | 109455705 | 109477177 | 21472  | normal term  | Dupl | somatic                          |
| 7   | 109455705 | 109477177 | 21472  | II_trimester | Dupl | somatic or paternally inherited* |
| 7   | 110183622 | 110184985 | 1363   | LGA          | Del  | somatic                          |
| 7   | 110183622 | 110184985 | 1363   | GD           | Del  | somatic                          |
| 7   | 110183622 | 110184985 | 1363   | II_trimester | Del  | somatic or paternally inherited* |
| 7   | 117994519 | 118160303 | 165784 | SGA          | Dupl | somatic                          |
| 7   | 117994519 | 118160303 | 165784 | LGA          | Dupl | somatic                          |
| 7   | 118263380 | 118572753 | 309373 | normal term  | Dupl | somatic                          |
| 7   | 122785918 | 122894149 | 108231 | PE           | Dupl | somatic                          |
| 7   | 122793182 | 122869067 | 75885  | normal term  | Dupl | somatic                          |
| 7   | 122793182 | 122869067 | 75885  | II_trimester | Dupl | somatic or paternally inherited* |
| 7   | 122798636 | 122869067 | 70431  | II_trimester | Dupl | parental data not available      |
| 7   | 125812615 | 125828396 | 15781  | SGA          | Del  | somatic                          |
| 7   | 128470837 | 128554093 | 83256  | LGA          | Dupl | somatic                          |
| 7   | 129555547 | 129761082 | 205535 | PE           | Del  | somatic                          |
| 7   | 129579325 | 129676786 | 97461  | LGA          | Del  | somatic                          |
| 7   | 129598336 | 129710136 | 111800 | I_trimester  | Del  | somatic or paternally inherited* |
| 7   | 135214060 | 135238834 | 24774  | II_trimester | Del  | somatic or paternally inherited* |
| 7   | 136980174 | 136994013 | 13839  | LGA          | Dupl | somatic                          |
| 7   | 138066098 | 138079079 | 12981  | SGA          | Del  | somatic                          |
| 7   | 138066098 | 138082575 | 16477  | PE           | Del  | somatic                          |
| 7   | 138066098 | 138079079 | 12981  | II_trimester | Del  | somatic or paternally inherited* |
| 7   | 141772628 | 141793419 | 20791  | GD           | Del  | maternally inherited             |
| 7   | 141772628 | 141793419 | 20791  | LGA          | Del  | somatic                          |
| 7   | 141772628 | 141793419 | 20791  | GD           | Del  | somatic                          |
| 7   | 149410638 | 149583170 | 172532 | normal term  | Dupl | somatic                          |
| 7   | 149420152 | 149563550 | 143398 | LGA          | Dupl | somatic                          |
| 7   | 151062348 | 151185655 | 123307 | LGA          | Dupl | somatic                          |
| 7   | 154201075 | 154203454 | 2379   | GD           | Dupl | somatic                          |
| 7   | 155246891 | 155269627 | 22736  | LGA          | Dupl | somatic                          |
| 8   | 1892069   | 1959336   | 67267  | LGA          | Dupl | somatic                          |
| 8   | 2142267   | 2158537   | 16270  | I_trimester  | Del  | maternally inherited             |
| 8   | 2781277   | 2833794   | 52517  | SGA          | Dupl | somatic                          |
| 8   | 2781277   | 2833794   | 52517  | PE           | Dupl | somatic                          |
| 8   | 2781277   | 2833794   | 52517  | GD           | Dupl | somatic                          |
| 8   | 2781277   | 2827657   | 46380  | I_trimester  | Dupl | somatic or paternally inherited* |
| 8   | 2784418   | 2827657   | 43239  | II_trimester | Dupl | parental data not available      |
| 8   | 2784418   | 2827657   | 43239  | normal term  | Dupl | somatic                          |
| 8   | 2784418   | 2891804   | 107386 | normal term  | Dupl | somatic                          |
| 8   | 2784418   | 2827657   | 43239  | SGA          | Dupl | somatic                          |
| 8   | 2784418   | 2833794   | 49376  | PE           | Dupl | somatic                          |
| 8   | 2796810   | 2827657   | 30847  | II_trimester | Dupl | somatic or paternally inherited* |
| 8   | 2797776   | 2827657   | 29881  | normal term  | Dupl | somatic                          |
| 8   | 2797776   | 2827657   | 29881  | II_trimester | Dupl | somatic or paternally inherited* |
| 8   | 2808265   | 2827657   | 19392  | normal term  | Dupl | somatic                          |
| 8   | 2808265   | 2827657   | 19392  | normal term  | Dupl | somatic                          |
| 8   | 2808265   | 2827657   | 19392  | GD           | Dupl | somatic                          |

| Chr | Start    | End      | Length  | Group        | Type | Inherited/somatic                |
|-----|----------|----------|---------|--------------|------|----------------------------------|
| 8   | 2808265  | 2833794  | 25529   | II_trimester | Dupl | somatic or paternally inherited* |
| 8   | 2808265  | 2827657  | 19392   | II_trimester | Dupl | somatic or paternally inherited* |
| 8   | 2811241  | 2833794  | 22553   | I_trimester  | Dupl | parental data not available      |
| 8   | 3786543  | 3789272  | 2729    | GD           | Del  | somatic                          |
| 8   | 3984758  | 3987799  | 3041    | I_trimester  | Del  | somatic or paternally inherited* |
| 8   | 4272581  | 4285663  | 13082   | normal term  | Dupl | somatic                          |
| 8   | 4272581  | 4278256  | 5675    | LGA          | Dupl | somatic                          |
| 8   | 4272581  | 4285663  | 13082   | LGA          | Dupl | somatic                          |
| 8   | 4272581  | 4290386  | 17805   | II_trimester | Dupl | somatic or paternally inherited* |
| 8   | 4272581  | 4285663  | 13082   | I_trimester  | Dupl | somatic or paternally inherited* |
| 8   | 4803156  | 4819101  | 15945   | II_trimester | Dupl | parental data not available      |
| 8   | 5535501  | 5547288  | 11787   | SGA          | Dupl | somatic                          |
| 8   | 5542087  | 5551530  | 9443    | normal term  | Dupl | somatic                          |
| 8   | 5563282  | 5587923  | 24641   | PE           | Del  | maternally inherited             |
| 8   | 5599399  | 5605087  | 5688    | SGA          | Del  | paternally inherited             |
| 8   | 5599399  | 5605087  | 5688    | GD           | Del  | paternally inherited             |
| 8   | 5599399  | 5605087  | 5688    | I_trimester  | Del  | maternally inherited             |
| 8   | 5599399  | 5607214  | 7815    | normal term  | Del  | somatic                          |
| 8   | 5599399  | 5605087  | 5688    | SGA          | Del  | somatic                          |
| 8   | 5599399  | 5605087  | 5688    | I_trimester  | Del  | somatic or paternally inherited* |
| 8   | 5601007  | 5605087  | 4080    | LGA          | Del  | maternally inherited             |
| 8   | 5601007  | 5604495  | 3488    | GD           | Del  | paternally inherited             |
| 8   | 6178302  | 6204395  | 26093   | LGA          | Del  | somatic                          |
| 8   | 8583108  | 8587589  | 4481    | GD           | Del  | maternally inherited             |
| 8   | 13390938 | 13531381 | 140443  | GD           | Dupl | paternally inherited             |
| 8   | 15015155 | 15095084 | 79929   | normal term  | Dupl | somatic                          |
| 8   | 15402936 | 15410250 | 7314    | I_trimester  | Del  | maternally inherited             |
| 8   | 15949771 | 16021467 | 71696   | normal term  | Del  | paternally inherited             |
| 8   | 16925693 | 16978400 | 52707   | SGA          | Dupl | somatic                          |
| 8   | 16925693 | 16978400 | 52707   | GD           | Dupl | somatic                          |
| 8   | 17580791 | 17581699 | 908     | normal term  | Del  | maternally inherited             |
| 8   | 17580791 | 17581699 | 908     | LGA          | Del  | maternally/paternally inherited  |
| 8   | 17580791 | 17581699 | 908     | normal term  | Del  | somatic                          |
| 8   | 18852474 | 18858239 | 5765    | normal term  | Del  | somatic                          |
| 8   | 30535659 | 30581500 | 45841   | II_trimester | Del  | somatic or paternally inherited* |
| 8   | 38190769 | 38240007 | 49238   | I_trimester  | Dupl | parental data not available      |
| 8   | 51031221 | 51033517 | 2296    | I_trimester  | Del  | parental data not available      |
| 8   | 51031221 | 51033517 | 2296    | LGA          | Del  | somatic                          |
| 8   | 51031221 | 51033517 | 2296    | LGA          | Del  | somatic                          |
| 8   | 51031221 | 51033517 | 2296    | GD           | Del  | somatic                          |
| 8   | 51125276 | 52619866 | 1494590 | I_trimester  | Dupl | somatic or paternally inherited* |
| 8   | 55688171 | 55865884 | 177713  | PE           | Dupl | somatic                          |
| 8   | 55693447 | 55828934 | 135487  | LGA          | Dupl | somatic                          |
| 8   | 60486037 | 60565984 | 79947   | SGA          | Dupl | somatic                          |
| 8   | 66285716 | 66597341 | 311625  | LGA          | Del  | somatic                          |
| 8   | 66396331 | 66597341 | 201010  | normal term  | Del  | somatic                          |
| 8   | 67465588 | 67934729 | 469141  | normal term  | Del  | somatic                          |

| Chr | Start     | End       | Length  | Group        | Type | Inherited/somatic                |
|-----|-----------|-----------|---------|--------------|------|----------------------------------|
| 8   | 67590460  | 67677587  | 87127   | LGA          | Del  | somatic                          |
| 8   | 67594777  | 67677587  | 82810   | LGA          | Del  | somatic                          |
| 8   | 67623174  | 67677587  | 54413   | normal term  | Del  | somatic                          |
| 8   | 69444341  | 69516939  | 72598   | LGA          | Dupl | somatic                          |
| 8   | 72215549  | 72217689  | 2140    | GD           | Del  | somatic                          |
| 8   | 72215549  | 72217689  | 2140    | II_trimester | Del  | somatic or paternally inherited* |
| 8   | 72215549  | 72217689  | 2140    | II_trimester | Del  | somatic or paternally inherited* |
| 8   | 73169918  | 73172443  | 2525    | GD           | Del  | somatic                          |
| 8   | 73169918  | 73172443  | 2525    | II_trimester | Del  | somatic or paternally inherited* |
| 8   | 75925763  | 76037567  | 111804  | normal term  | Dupl | somatic                          |
| 8   | 78141371  | 78637869  | 496498  | normal term  | Dupl | somatic                          |
| 8   | 78170272  | 78551701  | 381429  | SGA          | Dupl | somatic                          |
| 8   | 78214641  | 78633267  | 418626  | I_trimester  | Dupl | somatic or paternally inherited* |
| 8   | 78352373  | 78637869  | 285496  | II_trimester | Dupl | parental data not available      |
| 8   | 81101996  | 81389791  | 287795  | PE           | Del  | somatic                          |
| 8   | 81149186  | 81358791  | 209605  | normal term  | Del  | somatic                          |
| 8   | 83271395  | 83293872  | 22477   | PE           | Del  | maternally inherited             |
| 8   | 84077412  | 84097208  | 19796   | normal term  | Dupl | somatic                          |
| 8   | 84077412  | 84097208  | 19796   | PE           | Dupl | somatic                          |
| 8   | 84077412  | 84097208  | 19796   | GD           | Dupl | somatic                          |
| 8   | 85257540  | 85265997  | 8457    | PE           | Del  | somatic                          |
| 8   | 89119304  | 89157918  | 38614   | II_trimester | Dupl | somatic or paternally inherited* |
| 8   | 92107070  | 92183658  | 76588   | normal term  | Del  | maternally inherited             |
| 8   | 92128840  | 92183658  | 54818   | SGA          | Del  | maternally inherited             |
| 8   | 92391870  | 92479701  | 87831   | normal term  | Dupl | somatic                          |
| 8   | 95809165  | 95820969  | 11804   | II_trimester | Del  | somatic or paternally inherited* |
| 8   | 105957540 | 105981846 | 24306   | LGA          | Dupl | somatic                          |
| 8   | 113219539 | 114227020 | 1007481 | II_trimester | Dupl | parental data not available      |
| 8   | 113234556 | 114227020 | 992464  | II_trimester | Dupl | somatic or paternally inherited* |
| 8   | 113235742 | 114227020 | 991278  | PE           | Dupl | somatic                          |
| 8   | 113411888 | 114194727 | 782839  | normal term  | Dupl | somatic                          |
| 8   | 113411888 | 114199799 | 787911  | LGA          | Dupl | somatic                          |
| 8   | 113411888 | 114227020 | 815132  | GD           | Dupl | somatic                          |
| 8   | 113903821 | 114227020 | 323199  | II_trimester | Dupl | somatic or paternally inherited* |
| 8   | 113960534 | 114196344 | 235810  | LGA          | Dupl | somatic                          |
| 8   | 115641238 | 115642408 | 1170    | normal term  | Del  | somatic                          |
| 8   | 115641238 | 115642408 | 1170    | II_trimester | Del  | somatic or paternally inherited* |
| 8   | 115641238 | 115642408 | 1170    | II_trimester | Del  | somatic or paternally inherited* |
| 8   | 115641238 | 115642408 | 1170    | I_trimester  | Del  | somatic or paternally inherited* |
| 8   | 116537833 | 117099512 | 561679  | I_trimester  | Dupl | somatic or paternally inherited* |
| 8   | 127150370 | 127157289 | 6919    | normal term  | Del  | somatic                          |
| 8   | 135771473 | 135847442 | 75969   | II_trimester | Dupl | parental data not available      |
| 8   | 136539132 | 136667194 | 128062  | PE           | Dupl | somatic                          |
| 8   | 137682484 | 137857327 | 174843  | GD           | Del  | paternally inherited             |
| 8   | 137697834 | 137857327 | 159493  | normal term  | Del  | maternally inherited             |
| 8   | 144460569 | 144687092 | 226523  | normal term  | Dupl | somatic                          |
| 8   | 144936032 | 145018354 | 82322   | I trimester  | Dupl | somatic or paternally inherited* |



| Chr | Start     | End       | Length | Group        | Type | Inherited/somatic                |
|-----|-----------|-----------|--------|--------------|------|----------------------------------|
| 8   | 144974963 | 145067467 | 92504  | I_trimester  | Dupl | parental data not available      |
| 8   | 144974963 | 145059425 | 84462  | I_trimester  | Dupl | somatic or paternally inherited* |
| 8   | 144976654 | 145067467 | 90813  | normal term  | Dupl | somatic                          |
| 8   | 144976654 | 145059425 | 82771  | SGA          | Dupl | somatic                          |
| 8   | 144976654 | 145018354 | 41700  | LGA          | Dupl | somatic                          |
| 9   | 395025    | 707463    | 312438 | II_trimester | Dupl | maternally inherited             |
| 9   | 2148213   | 2151194   | 2981   | II_trimester | Del  | somatic or paternally inherited* |
| 9   | 2148213   | 2151194   | 2981   | I_trimester  | Del  | somatic or paternally inherited* |
| 9   | 5306824   | 5335470   | 28646  | GD           | Del  | paternally inherited             |
| 9   | 6701130   | 6705824   | 4694   | normal term  | Del  | somatic                          |
| 9   | 6701130   | 6705824   | 4694   | LGA          | Del  | somatic                          |
| 9   | 9292356   | 9338113   | 45757  | normal term  | Dupl | somatic                          |
| 9   | 10354430  | 10369161  | 14731  | SGA          | Dupl | somatic                          |
| 9   | 10543899  | 10649660  | 105761 | II_trimester | Dupl | parental data not available      |
| 9   | 10595208  | 10649660  | 54452  | II_trimester | Dupl | somatic or paternally inherited* |
| 9   | 10595208  | 10649660  | 54452  | II_trimester | Dupl | somatic or paternally inherited* |
| 9   | 11127388  | 11434678  | 307290 | normal term  | Dupl | somatic                          |
| 9   | 11274798  | 11434678  | 159880 | normal term  | Dupl | somatic                          |
| 9   | 11434678  | 11463799  | 29121  | PE           | Del  | paternally inherited             |
| 9   | 12112566  | 12216756  | 104190 | normal term  | Dupl | somatic                          |
| 9   | 12578438  | 12716172  | 137734 | normal term  | Dupl | somatic                          |
| 9   | 14585052  | 14679206  | 94154  | GD           | Dupl | somatic                          |
| 9   | 14589694  | 14679206  | 89512  | normal term  | Dupl | somatic                          |
| 9   | 14589694  | 14692676  | 102982 | normal term  | Dupl | somatic                          |
| 9   | 14590805  | 14677538  | 86733  | normal term  | Dupl | somatic                          |
| 9   | 14590805  | 14677538  | 86733  | II_trimester | Dupl | somatic or paternally inherited* |
| 9   | 17400701  | 17503073  | 102372 | normal term  | Dupl | somatic                          |
| 9   | 17400701  | 17502205  | 101504 | I_trimester  | Dupl | somatic or paternally inherited* |
| 9   | 17457854  | 17502205  | 44351  | II_trimester | Dupl | parental data not available      |
| 9   | 19010867  | 19133732  | 122865 | LGA          | Del  | somatic                          |
| 9   | 19030014  | 19303086  | 273072 | PE           | Del  | somatic                          |
| 9   | 19045502  | 19419528  | 374026 | LGA          | Del  | somatic                          |
| 9   | 19132051  | 19253268  | 121217 | normal term  | Del  | somatic                          |
| 9   | 19138990  | 19211852  | 72862  | PE           | Del  | somatic                          |
| 9   | 19138990  | 19206930  | 67940  | PE           | Del  | somatic                          |
| 9   | 19138990  | 19223304  | 84314  | GD           | Del  | somatic                          |
| 9   | 19142014  | 19206930  | 64916  | GD           | Del  | somatic                          |
| 9   | 19142014  | 19206930  | 64916  | GD           | Del  | somatic                          |
| 9   | 19142014  | 19253268  | 111254 | SGA          | Del  | somatic or paternally inherited* |
| 9   | 19142014  | 19258183  | 116169 | II_trimester | Del  | somatic or paternally inherited* |
| 9   | 24573717  | 24616032  | 42315  | II_trimester | Dupl | somatic or paternally inherited* |
| 9   | 24754015  | 24795767  | 41752  | SGA          | Del  | paternally inherited             |
| 9   | 24922485  | 24999327  | 76842  | II_trimester | Dupl | somatic or paternally inherited* |
| 9   | 26567999  | 26572537  | 4538   | PE           | Del  | somatic                          |
| 9   | 29584528  | 29606866  | 22338  | LGA          | Dupl | somatic                          |
| 9   | 33818257  | 34237480  | 419223 | normal term  | Del  | somatic                          |
| 9   | 73907625  | 73909871  | 2246   | normal term  | Dupl | paternally inherited             |

| Chr | Start     | End       | Length | Group        | Type | Inherited/somatic                |
|-----|-----------|-----------|--------|--------------|------|----------------------------------|
| 9   | 75519946  | 75523871  | 3925   | SGA          | Dupl | somatic                          |
| 9   | 86488586  | 86571798  | 83212  | LGA          | Del  | somatic                          |
| 9   | 127764305 | 128099037 | 334732 | PE           | Del  | somatic                          |
| 9   | 127784990 | 128116817 | 331827 | PE           | Del  | somatic                          |
| 9   | 132649662 | 132830460 | 180798 | LGA          | Del  | somatic                          |
| 9   | 132655864 | 132849126 | 193262 | normal term  | Del  | somatic                          |
| 9   | 132655864 | 132849126 | 193262 | LGA          | Del  | somatic                          |
| 9   | 139220876 | 139303300 | 82424  | LGA          | Dupl | somatic                          |
| 9   | 139240630 | 139303300 | 62670  | PE           | Dupl | somatic                          |
| 9   | 139240630 | 139303300 | 62670  | PE           | Dupl | somatic                          |
| 9   | 139240630 | 139303300 | 62670  | II_trimester | Dupl | somatic or paternally inherited* |
| 9   | 139240630 | 139303300 | 62670  | II_trimester | Dupl | somatic or paternally inherited* |
| 9   | 139240630 | 139306467 | 65837  | II_trimester | Dupl | somatic or paternally inherited* |
| 10  | 4627791   | 4672037   | 44246  | SGA          | Dupl | somatic                          |
| 10  | 12292343  | 12369860  | 77517  | LGA          | Del  | somatic                          |
| 10  | 13056587  | 13058458  | 1871   | SGA          | Del  | maternally inherited             |
| 10  | 15070615  | 15117114  | 46499  | LGA          | Del  | somatic                          |
| 10  | 15071618  | 15117114  | 45496  | normal term  | Del  | somatic                          |
| 10  | 20842031  | 20857365  | 15334  | SGA          | Del  | somatic                          |
| 10  | 20850624  | 20857365  | 6741   | LGA          | Del  | maternally inherited             |
| 10  | 20850624  | 20857365  | 6741   | normal term  | Del  | somatic                          |
| 10  | 20850624  | 20857365  | 6741   | SGA          | Del  | somatic                          |
| 10  | 20850624  | 20857365  | 6741   | PE           | Del  | somatic                          |
| 10  | 20850624  | 20857365  | 6741   | PE           | Del  | somatic                          |
| 10  | 20850624  | 20857365  | 6741   | GD           | Del  | somatic                          |
| 10  | 20850624  | 20857365  | 6741   | SGA          | Del  | somatic or paternally inherited* |
| 10  | 20850624  | 20857365  | 6741   | II_trimester | Del  | somatic or paternally inherited* |
| 10  | 20850624  | 20857365  | 6741   | II_trimester | Del  | somatic or paternally inherited* |
| 10  | 20850624  | 20857365  | 6741   | II_trimester | Del  | somatic or paternally inherited* |
| 10  | 20850624  | 20857365  | 6741   | II_trimester | Del  | somatic or paternally inherited* |
| 10  | 20850624  | 20857365  | 6741   | II_trimester | Del  | somatic or paternally inherited* |
| 10  | 20850624  | 20857365  | 6741   | I_trimester  | Del  | somatic or paternally inherited* |
| 10  | 21701220  | 21740640  | 39420  | LGA          | Del  | somatic                          |
| 10  | 22209221  | 22336151  | 126930 | II_trimester | Dupl | somatic or paternally inherited* |
| 10  | 27075698  | 27266501  | 190803 | LGA          | Del  | somatic                          |
| 10  | 37232329  | 37671202  | 438873 | I_trimester  | Dupl | somatic or paternally inherited* |
| 10  | 37236853  | 37274522  | 37669  | LGA          | Dupl | somatic                          |
| 10  | 37239564  | 37283349  | 43785  | SGA          | Dupl | somatic                          |
| 10  | 45118949  | 45446917  | 327968 | SGA          | Dupl | maternally inherited             |
| 10  | 47543322  | 47568296  | 24974  | I_trimester  | Dupl | maternally inherited             |
| 10  | 47543322  | 47703869  | 160547 | II_trimester | Dupl | somatic or paternally inherited* |
| 10  | 53385459  | 53404012  | 18553  | II_trimester | Del  | somatic or paternally inherited* |
| 10  | 53657647  | 53682130  | 24483  | II_trimester | Del  | somatic or paternally inherited* |
| 10  | 54016061  | 54016781  | 720    | SGA          | Del  | somatic                          |
| 10  | 54016061  | 54016781  | 720    | SGA          | Del  | somatic                          |
| 10  | 54016061  | 54016781  | 720    | I_trimester  | Del  | somatic or paternally inherited* |
| 10  | 55735462  | 55779914  | 44452  | SGA          | Del  | maternally inherited             |

| Chr | Start    | End      | Length | Group        | Type | Inherited/somatic                |
|-----|----------|----------|--------|--------------|------|----------------------------------|
| 10  | 56971092 | 57012515 | 41423  | normal term  | Dupl | somatic                          |
| 10  | 59210800 | 59211698 | 898    | PE           | Del  | somatic                          |
| 10  | 59210800 | 59211698 | 898    | PE           | Del  | somatic                          |
| 10  | 60839167 | 61035570 | 196403 | normal term  | Dupl | somatic                          |
| 10  | 62212334 | 62320330 | 107996 | II_trimester | Dupl | somatic or paternally inherited* |
| 10  | 62235443 | 62320330 | 84887  | GD           | Dupl | somatic                          |
| 10  | 62259224 | 62320330 | 61106  | I_trimester  | Dupl | somatic or paternally inherited* |
| 10  | 63116273 | 63204366 | 88093  | PE           | Dupl | somatic                          |
| 10  | 63149922 | 63187103 | 37181  | II_trimester | Dupl | somatic or paternally inherited* |
| 10  | 63157465 | 63187103 | 29638  | II_trimester | Dupl | parental data not available      |
| 10  | 63157465 | 63187103 | 29638  | I_trimester  | Dupl | parental data not available      |
| 10  | 63157465 | 63204366 | 46901  | normal term  | Dupl | somatic                          |
| 10  | 63157465 | 63204366 | 46901  | normal term  | Dupl | somatic                          |
| 10  | 63157465 | 63183583 | 26118  | normal term  | Dupl | somatic                          |
| 10  | 63157465 | 63187103 | 29638  | SGA          | Dupl | somatic                          |
| 10  | 63157465 | 63183583 | 26118  | GD           | Dupl | somatic                          |
| 10  | 63157465 | 63187103 | 29638  | GD           | Dupl | somatic                          |
| 10  | 63157465 | 63204366 | 46901  | GD           | Dupl | somatic                          |
| 10  | 63157465 | 63183583 | 26118  | GD           | Dupl | somatic                          |
| 10  | 63157465 | 63187103 | 29638  | II_trimester | Dupl | somatic or paternally inherited* |
| 10  | 63157465 | 63187103 | 29638  | II_trimester | Dupl | somatic or paternally inherited* |
| 10  | 63157465 | 63204366 | 46901  | I_trimester  | Dupl | somatic or paternally inherited* |
| 10  | 63166773 | 63221167 | 54394  | normal term  | Dupl | somatic                          |
| 10  | 64819996 | 64919511 | 99515  | II_trimester | Del  | somatic or paternally inherited* |
| 10  | 66884125 | 66904588 | 20463  | GD           | Dupl | somatic                          |
| 10  | 66885915 | 66909326 | 23411  | II_trimester | Dupl | parental data not available      |
| 10  | 66885915 | 66909326 | 23411  | normal term  | Dupl | somatic                          |
| 10  | 66885915 | 66913425 | 27510  | SGA          | Dupl | somatic                          |
| 10  | 66885915 | 66909326 | 23411  | GD           | Dupl | somatic                          |
| 10  | 68065751 | 68102333 | 36582  | SGA          | Del  | maternally inherited             |
| 10  | 68072084 | 68114481 | 42397  | I_trimester  | Del  | maternally inherited             |
| 10  | 68078481 | 68114481 | 36000  | LGA          | Del  | maternally inherited             |
| 10  | 68078481 | 68114481 | 36000  | II_trimester | Del  | maternally inherited             |
| 10  | 68845232 | 68898306 | 53074  | II_trimester | Dupl | parental data not available      |
| 10  | 68845232 | 68888491 | 43259  | normal term  | Dupl | somatic                          |
| 10  | 68845232 | 68898306 | 53074  | SGA          | Dupl | somatic                          |
| 10  | 68845232 | 68888491 | 43259  | PE           | Dupl | somatic                          |
| 10  | 68845232 | 68888491 | 43259  | GD           | Dupl | somatic                          |
| 10  | 68845232 | 68898306 | 53074  | GD           | Dupl | somatic                          |
| 10  | 68845232 | 68898306 | 53074  | II_trimester | Dupl | somatic or paternally inherited* |
| 10  | 68845232 | 68898306 | 53074  | II_trimester | Dupl | somatic or paternally inherited* |
| 10  | 68845232 | 68898306 | 53074  | II_trimester | Dupl | somatic or paternally inherited* |
| 10  | 68845232 | 68898306 | 53074  | I_trimester  | Dupl | somatic or paternally inherited* |
| 10  | 70061336 | 70613280 | 551944 | LGA          | Del  | somatic                          |
| 10  | 70127696 | 70319626 | 191930 | normal term  | Del  | somatic                          |
| 10  | 70127696 | 70595425 | 467729 | II_trimester | Del  | somatic or paternally inherited* |
| 10  | 70174706 | 70616973 | 442267 | normal term  | Del  | somatic                          |

| Chr | Start     | End       | Length | Group        | Type | Inherited/somatic                |
|-----|-----------|-----------|--------|--------------|------|----------------------------------|
| 10  | 71641240  | 71652128  | 10888  | LGA          | Dupl | somatic                          |
| 10  | 74317852  | 74442258  | 124406 | II_trimester | Del  | somatic or paternally inherited* |
| 10  | 83944705  | 83959178  | 14473  | PE           | Del  | maternally inherited             |
| 10  | 88768657  | 88799610  | 30953  | II_trimester | Del  | somatic or paternally inherited* |
| 10  | 88786593  | 88813420  | 26827  | LGA          | Del  | somatic                          |
| 10  | 95426888  | 95459817  | 32929  | I_trimester  | Dupl | somatic or paternally inherited* |
| 10  | 96499710  | 96564326  | 64616  | I_trimester  | Del  | maternally inherited             |
| 10  | 96557335  | 96594311  | 36976  | II_trimester | Del  | somatic or paternally inherited* |
| 10  | 98410170  | 98684650  | 274480 | LGA          | Del  | somatic                          |
| 10  | 98410901  | 98657516  | 246615 | LGA          | Del  | somatic                          |
| 10  | 98508321  | 98684650  | 176329 | PE           | Del  | somatic                          |
| 10  | 98513814  | 98684650  | 170836 | PE           | Del  | somatic                          |
| 10  | 98513814  | 98604466  | 90652  | normal term  | Del  | somatic                          |
| 10  | 98513814  | 98684650  | 170836 | LGA          | Del  | somatic                          |
| 10  | 98513814  | 98657516  | 143702 | II_trimester | Del  | somatic or paternally inherited* |
| 10  | 98513814  | 98657516  | 143702 | I_trimester  | Del  | somatic or paternally inherited* |
| 10  | 98521516  | 98684650  | 163134 | II_trimester | Del  | somatic or paternally inherited* |
| 10  | 99003375  | 99059645  | 56270  | LGA          | Del  | somatic                          |
| 10  | 102111045 | 102209160 | 98115  | II_trimester | Del  | somatic or paternally inherited* |
| 10  | 102152297 | 102209160 | 56863  | LGA          | Del  | somatic                          |
| 10  | 102152297 | 102209160 | 56863  | LGA          | Del  | somatic                          |
| 10  | 115660297 | 115680935 | 20638  | GD           | Dupl | somatic                          |
| 10  | 119714635 | 119813953 | 99318  | normal term  | Dupl | somatic                          |
| 10  | 120850164 | 120880910 | 30746  | normal term  | Del  | somatic                          |
| 10  | 123642539 | 123801422 | 158883 | LGA          | Del  | somatic                          |
| 10  | 124178977 | 124220681 | 41704  | LGA          | Dupl | somatic or paternally inherited* |
| 10  | 130458098 | 130835311 | 377213 | normal term  | Dupl | somatic                          |
| 10  | 133943800 | 133966434 | 22634  | II_trimester | Dupl | somatic or paternally inherited* |
| 10  | 133946326 | 134102055 | 155729 | LGA          | Dupl | somatic                          |
| 10  | 134529972 | 134693532 | 163560 | normal term  | Dupl | paternally inherited             |
| 10  | 135234393 | 135378802 | 144409 | I_trimester  | Dupl | parental data not available      |
| 10  | 135234393 | 135508269 | 273876 | I_trimester  | Dupl | somatic or paternally inherited* |
| 10  | 135252347 | 135377448 | 125101 | normal term  | Dupl | maternally inherited             |
| 10  | 135252347 | 135508269 | 255922 | PE           | Dupl | maternally inherited             |
| 10  | 135252347 | 135508269 | 255922 | II_trimester | Dupl | maternally inherited             |
| 10  | 135252347 | 135378802 | 126455 | I_trimester  | Dupl | maternally inherited             |
| 11  | 382912    | 424290    | 41378  | normal term  | Dupl | somatic                          |
| 11  | 2612560   | 2743858   | 131298 | normal term  | Dupl | somatic                          |
| 11  | 3242222   | 3243426   | 1204   | GD           | Del  | somatic                          |
| 11  | 3698842   | 3837204   | 138362 | LGA          | Del  | somatic                          |
| 11  | 3849710   | 4168342   | 318632 | normal term  | Del  | somatic                          |
| 11  | 6340705   | 6355016   | 14311  | normal term  | Del  | somatic                          |
| 11  | 9215691   | 9516186   | 300495 | PE           | Del  | somatic                          |
| 11  | 9226514   | 9516186   | 289672 | PE           | Del  | somatic                          |
| 11  | 9226514   | 9594827   | 368313 | PE           | Del  | somatic                          |
| 11  | 9258146   | 9593426   | 335280 | SGA          | Del  | somatic or paternally inherited* |
| 11  | 17111027  | 17394596  | 283569 | LGA          | Del  | somatic                          |

| Chr | Start    | End      | Length  | Group        | Type | Inherited/somatic                |
|-----|----------|----------|---------|--------------|------|----------------------------------|
| 11  | 17111027 | 17308130 | 197103  | PE           | Del  | somatic                          |
| 11  | 18949220 | 18956690 | 7470    | PE           | Del  | somatic                          |
| 11  | 22391419 | 22400813 | 9394    | SGA          | Dupl | somatic                          |
| 11  | 24412620 | 24551109 | 138489  | I_trimester  | Dupl | somatic or paternally inherited* |
| 11  | 24419480 | 24551109 | 131629  | II_trimester | Dupl | somatic or paternally inherited* |
| 11  | 31595748 | 31729792 | 134044  | I_trimester  | Dupl | parental data not available      |
| 11  | 34458229 | 34460861 | 2632    | SGA          | Dupl | somatic                          |
| 11  | 37080974 | 37150239 | 69265   | LGA          | Dupl | somatic                          |
| 11  | 37083616 | 37150239 | 66623   | PE           | Dupl | somatic                          |
| 11  | 48647107 | 49146066 | 498959  | PE           | Del  | somatic                          |
| 11  | 48650491 | 48942781 | 292290  | PE           | Del  | somatic                          |
| 11  | 48650491 | 48942781 | 292290  | LGA          | Del  | somatic                          |
| 11  | 48650491 | 48942781 | 292290  | LGA          | Del  | somatic                          |
| 11  | 48650491 | 48942781 | 292290  | PE           | Del  | somatic                          |
| 11  | 48650491 | 48987538 | 337047  | PE           | Del  | somatic                          |
| 11  | 48651903 | 48942781 | 290878  | II_trimester | Del  | parental data not available      |
| 11  | 48651903 | 48987538 | 335635  | normal term  | Del  | somatic                          |
| 11  | 48651903 | 49010832 | 358929  | normal term  | Del  | somatic                          |
| 11  | 48651903 | 48942781 | 290878  | normal term  | Del  | somatic                          |
| 11  | 48651903 | 48942781 | 290878  | normal term  | Del  | somatic                          |
| 11  | 48651903 | 48942781 | 290878  | normal term  | Del  | somatic                          |
| 11  | 48651903 | 48942781 | 290878  | LGA          | Del  | somatic                          |
| 11  | 48651903 | 48942781 | 290878  | PE           | Del  | somatic                          |
| 11  | 48651903 | 49010832 | 358929  | GD           | Del  | somatic                          |
| 11  | 48651903 | 48942781 | 290878  | II_trimester | Del  | somatic or paternally inherited* |
| 11  | 48651903 | 48942781 | 290878  | I_trimester  | Del  | somatic or paternally inherited* |
| 11  | 48651903 | 48942781 | 290878  | I_trimester  | Del  | somatic or paternally inherited* |
| 11  | 48651903 | 48942781 | 290878  | I_trimester  | Del  | somatic or paternally inherited* |
| 11  | 48694871 | 48942781 | 247910  | normal term  | Del  | somatic                          |
| 11  | 48694871 | 49010832 | 315961  | SGA          | Del  | somatic                          |
| 11  | 48694871 | 48942781 | 247910  | SGA          | Del  | somatic                          |
| 11  | 48694871 | 48942781 | 247910  | II_trimester | Del  | somatic or paternally inherited* |
| 11  | 48694871 | 48942781 | 247910  | II_trimester | Del  | somatic or paternally inherited* |
| 11  | 48694871 | 48942781 | 247910  | I_trimester  | Del  | somatic or paternally inherited* |
| 11  | 48747611 | 48942781 | 195170  | normal term  | Del  | somatic                          |
| 11  | 48747611 | 48942781 | 195170  | PE           | Del  | somatic                          |
| 11  | 48747611 | 48942781 | 195170  | II_trimester | Del  | somatic or paternally inherited* |
| 11  | 48747611 | 48942781 | 195170  | I_trimester  | Del  | somatic or paternally inherited* |
| 11  | 48754534 | 48942781 | 188247  | LGA          | Del  | somatic                          |
| 11  | 48760364 | 48942781 | 182417  | GD           | Del  | somatic                          |
| 11  | 48864169 | 48942781 | 78612   | I_trimester  | Del  | somatic or paternally inherited* |
| 11  | 48987538 | 50057854 | 1070316 | LGA          | Dupl | somatic                          |
| 11  | 55360213 | 55465912 | 105699  | II_trimester | Del  | somatic or paternally inherited* |
| 11  | 55365761 | 55427700 | 61939   | normal term  | Del  | somatic                          |
| 11  | 55365761 | 55451045 | 85284   | normal term  | Del  | somatic                          |
| 11  | 55365761 | 55451045 | 85284   | PE           | Del  | somatic                          |
| 11  | 55365761 | 55427700 | 61939   | GD           | Del  | somatic                          |

| Chr | Start     | End       | Length | Group        | Type | Inherited/somatic                |
|-----|-----------|-----------|--------|--------------|------|----------------------------------|
| 11  | 55431897  | 55451045  | 19148  | GD           | Del  | somatic                          |
| 11  | 59204920  | 59241747  | 36827  | PE           | Del  | paternally inherited             |
| 11  | 63341096  | 63723238  | 382142 | PE           | Del  | somatic                          |
| 11  | 63343322  | 63579191  | 235869 | LGA          | Del  | somatic                          |
| 11  | 63550922  | 63570347  | 19425  | II_trimester | Del  | somatic or paternally inherited* |
| 11  | 66615838  | 66626234  | 10396  | SGA          | Dupl | somatic                          |
| 11  | 66832528  | 67011765  | 179237 | normal term  | Del  | somatic                          |
| 11  | 70077881  | 70118489  | 40608  | II_trimester | Del  | somatic or paternally inherited* |
| 11  | 73109635  | 73576748  | 467113 | normal term  | Del  | somatic                          |
| 11  | 73378142  | 73581908  | 203766 | PE           | Del  | somatic                          |
| 11  | 73383382  | 73576748  | 193366 | II_trimester | Del  | somatic or paternally inherited* |
| 11  | 81503992  | 81517261  | 13269  | GD           | Del  | maternally inherited             |
| 11  | 81503992  | 81517261  | 13269  | II_trimester | Del  | somatic or paternally inherited* |
| 11  | 81556771  | 81813575  | 256804 | normal term  | Dupl | somatic                          |
| 11  | 86931924  | 87033619  | 101695 | SGA          | Dupl | somatic                          |
| 11  | 88696662  | 88794180  | 97518  | SGA          | Dupl | somatic                          |
| 11  | 88696662  | 88794180  | 97518  | SGA          | Dupl | somatic                          |
| 11  | 88696662  | 88794180  | 97518  | LGA          | Dupl | somatic                          |
| 11  | 88696662  | 88744425  | 47763  | PE           | Dupl | somatic                          |
| 11  | 88696662  | 88794180  | 97518  | PE           | Dupl | somatic                          |
| 11  | 88696662  | 88794180  | 97518  | GD           | Dupl | somatic                          |
| 11  | 88696662  | 88753844  | 57182  | GD           | Dupl | somatic                          |
| 11  | 88696662  | 88744425  | 47763  | SGA          | Dupl | somatic or paternally inherited* |
| 11  | 88696662  | 88794180  | 97518  | LGA          | Dupl | somatic or paternally inherited* |
| 11  | 88696662  | 88794180  | 97518  | II_trimester | Dupl | somatic or paternally inherited* |
| 11  | 88696662  | 88794180  | 97518  | II_trimester | Dupl | somatic or paternally inherited* |
| 11  | 88696662  | 88794180  | 97518  | II_trimester | Dupl | somatic or paternally inherited* |
| 11  | 88696662  | 88794180  | 97518  | II_trimester | Dupl | somatic or paternally inherited* |
| 11  | 88696662  | 88794180  | 97518  | II_trimester | Dupl | somatic or paternally inherited* |
| 11  | 88696662  | 88747548  | 50886  | I_trimester  | Dupl | somatic or paternally inherited* |
| 11  | 88696662  | 88794180  | 97518  | I_trimester  | Dupl | somatic or paternally inherited* |
| 11  | 90975749  | 91024468  | 48719  | II_trimester | Dupl | parental data not available      |
| 11  | 90975749  | 91019763  | 44014  | II_trimester | Dupl | somatic or paternally inherited* |
| 11  | 97861301  | 98621717  | 760416 | PE           | Del  | paternally inherited             |
| 11  | 99377407  | 99588130  | 210723 | SGA          | Dupl | paternally inherited             |
| 11  | 99525126  | 99566782  | 41656  | GD           | Del  | maternally inherited             |
| 11  | 101319531 | 101470545 | 151014 | II_trimester | Dupl | somatic or paternally inherited* |
| 11  | 107617517 | 107821944 | 204427 | LGA          | Del  | somatic                          |
| 11  | 107663102 | 107772104 | 109002 | LGA          | Del  | somatic                          |
| 11  | 109111782 | 109156782 | 45000  | GD           | Del  | paternally inherited             |
| 11  | 120557343 | 120630452 | 73109  | SGA          | Del  | maternally inherited             |
| 11  | 120558084 | 120630452 | 72368  | GD           | Del  | maternally inherited             |
| 11  | 122700789 | 122749214 | 48425  | GD           | Del  | maternally inherited             |
| 11  | 122936483 | 123017181 | 80698  | LGA          | Del  | somatic                          |
| 11  | 131626702 | 131645435 | 18733  | PE           | Del  | somatic                          |
| 11  | 131645435 | 131658127 | 12692  | SGA          | Dupl | somatic                          |
| 11  | 131645435 | 131665483 | 20048  | II_trimester | Dupl | somatic or paternally inherited* |
| 11  | 131651470 | 131660373 | 8903   | II_trimester | Dupl | somatic or paternally inherited* |

| Chr | Start     | End       | Length | Group        | Type | Inherited/somatic                |
|-----|-----------|-----------|--------|--------------|------|----------------------------------|
| 11  | 134603256 | 134604874 | 1618   | SGA          | Del  | somatic                          |
| 11  | 134603256 | 134604874 | 1618   | PE           | Del  | somatic                          |
| 12  | 1028314   | 1133150   | 104836 | normal term  | Del  | somatic                          |
| 12  | 2245636   | 2252924   | 7288   | II_trimester | Del  | maternally inherited             |
| 12  | 6243616   | 6259552   | 15936  | LGA          | Del  | somatic                          |
| 12  | 6243616   | 6244157   | 541    | LGA          | Del  | somatic                          |
| 12  | 8003757   | 8125745   | 121988 | II_trimester | Del  | somatic or paternally inherited* |
| 12  | 10262275  | 10410360  | 148085 | LGA          | Del  | somatic                          |
| 12  | 12423092  | 12483764  | 60672  | GD           | Del  | somatic                          |
| 12  | 16250913  | 16480949  | 230036 | GD           | Del  | maternally inherited             |
| 12  | 20524202  | 20551037  | 26835  | I_trimester  | Dupl | somatic or paternally inherited* |
| 12  | 20961322  | 21032242  | 70920  | SGA          | Dupl | somatic                          |
| 12  | 20996286  | 21014178  | 17892  | GD           | Dupl | somatic                          |
| 12  | 21482399  | 21498093  | 15694  | II_trimester | Dupl | parental data not available      |
| 12  | 21482399  | 21498093  | 15694  | normal term  | Dupl | somatic                          |
| 12  | 21482399  | 21498093  | 15694  | GD           | Dupl | somatic                          |
| 12  | 21482399  | 21498093  | 15694  | II_trimester | Dupl | somatic or paternally inherited* |
| 12  | 21482399  | 21498093  | 15694  | II_trimester | Dupl | somatic or paternally inherited* |
| 12  | 21484512  | 21497891  | 13379  | normal term  | Dupl | somatic                          |
| 12  | 21555582  | 21571978  | 16396  | II_trimester | Dupl | somatic or paternally inherited* |
| 12  | 22607819  | 22682681  | 74862  | II_trimester | Dupl | parental data not available      |
| 12  | 22607819  | 22682681  | 74862  | normal term  | Dupl | somatic                          |
| 12  | 22607819  | 22682681  | 74862  | normal term  | Dupl | somatic                          |
| 12  | 22607819  | 22666531  | 58712  | SGA          | Dupl | somatic                          |
| 12  | 22607819  | 22666531  | 58712  | SGA          | Dupl | somatic                          |
| 12  | 22607819  | 22682681  | 74862  | SGA          | Dupl | somatic                          |
| 12  | 22607819  | 22682681  | 74862  | LGA          | Dupl | somatic                          |
| 12  | 22607819  | 22647856  | 40037  | GD           | Dupl | somatic                          |
| 12  | 22607819  | 22682681  | 74862  | II_trimester | Dupl | somatic or paternally inherited* |
| 12  | 22607819  | 22682681  | 74862  | II_trimester | Dupl | somatic or paternally inherited* |
| 12  | 22607819  | 22682681  | 74862  | I_trimester  | Dupl | somatic or paternally inherited* |
| 12  | 22607819  | 22682681  | 74862  | I_trimester  | Dupl | somatic or paternally inherited* |
| 12  | 22618605  | 22682681  | 64076  | PE           | Dupl | somatic                          |
| 12  | 22618605  | 22682681  | 64076  | normal term  | Dupl | somatic                          |
| 12  | 22618605  | 22682681  | 64076  | normal term  | Dupl | somatic                          |
| 12  | 22618605  | 22682681  | 64076  | GD           | Dupl | somatic                          |
| 12  | 22618605  | 22682681  | 64076  | II_trimester | Dupl | somatic or paternally inherited* |
| 12  | 22618605  | 22682681  | 64076  | I_trimester  | Dupl | somatic or paternally inherited* |
| 12  | 24964383  | 24970708  | 6325   | LGA          | Dupl | somatic                          |
| 12  | 24964383  | 24970708  | 6325   | LGA          | Dupl | somatic                          |
| 12  | 27648411  | 27654546  | 6135   | I_trimester  | Del  | somatic or paternally inherited* |
| 12  | 31125834  | 31407303  | 281469 | normal term  | Dupl | paternally inherited             |
| 12  | 31266287  | 31409579  | 143292 | PE           | Dupl | maternally inherited             |
| 12  | 31266287  | 31409579  | 143292 | LGA          | Dupl | maternally inherited             |
| 12  | 31266287  | 31409579  | 143292 | PE           | Dupl | maternally inherited             |
| 12  | 31266287  | 31407303  | 141016 | GD           | Dupl | paternally inherited             |
| 12  | 31266287  | 31408696  | 142409 | normal term  | Dupl | somatic                          |

| Chr | Start    | End      | Length | Group        | Type | Inherited/somatic                |
|-----|----------|----------|--------|--------------|------|----------------------------------|
| 12  | 31266287 | 31409778 | 143491 | PE           | Dupl | somatic                          |
| 12  | 31266287 | 31409579 | 143292 | LGA          | Dupl | somatic or paternally inherited* |
| 12  | 39124891 | 39168186 | 43295  | I_trimester  | Dupl | somatic or paternally inherited* |
| 12  | 39967134 | 40046749 | 79615  | II_trimester | Dupl | parental data not available      |
| 12  | 39967134 | 40053423 | 86289  | I_trimester  | Dupl | somatic or paternally inherited* |
| 12  | 40875351 | 40875963 | 612    | SGA          | Del  | somatic                          |
| 12  | 44835241 | 44936388 | 101147 | normal term  | Dupl | somatic                          |
| 12  | 52846534 | 52859985 | 13451  | I_trimester  | Del  | maternally inherited             |
| 12  | 54319727 | 54428011 | 108284 | normal term  | Dupl | somatic                          |
| 12  | 55150448 | 55214145 | 63697  | normal term  | Del  | somatic                          |
| 12  | 56271676 | 56339545 | 67869  | normal term  | Del  | somatic                          |
| 12  | 56761845 | 56777105 | 15260  | LGA          | Del  | somatic                          |
| 12  | 59935926 | 59942122 | 6196   | normal term  | Del  | somatic                          |
| 12  | 59935926 | 59942122 | 6196   | LGA          | Del  | somatic                          |
| 12  | 59935926 | 59942122 | 6196   | PE           | Del  | somatic                          |
| 12  | 59935926 | 59942122 | 6196   | PE           | Del  | somatic                          |
| 12  | 59935926 | 59942122 | 6196   | II_trimester | Del  | somatic or paternally inherited* |
| 12  | 59935926 | 59942122 | 6196   | II_trimester | Del  | somatic or paternally inherited* |
| 12  | 59935926 | 59942122 | 6196   | II_trimester | Del  | somatic or paternally inherited* |
| 12  | 61300873 | 61321575 | 20702  | PE           | Dupl | somatic                          |
| 12  | 70874726 | 70877257 | 2531   | SGA          | Del  | somatic                          |
| 12  | 72276649 | 72331317 | 54668  | normal term  | Dupl | somatic                          |
| 12  | 76421253 | 76452090 | 30837  | II_trimester | Dupl | somatic or paternally inherited* |
| 12  | 76439477 | 76452090 | 12613  | SGA          | Dupl | somatic                          |
| 12  | 79432940 | 79484133 | 51193  | normal term  | Dupl | somatic                          |
| 12  | 79441370 | 79473658 | 32288  | normal term  | Dupl | somatic                          |
| 12  | 81007138 | 81092260 | 85122  | PE           | Dupl | somatic                          |
| 12  | 81007138 | 81117172 | 110034 | LGA          | Dupl | somatic                          |
| 12  | 81007138 | 81117172 | 110034 | GD           | Dupl | somatic                          |
| 12  | 81007138 | 81103143 | 96005  | GD           | Dupl | somatic                          |
| 12  | 81007138 | 81092260 | 85122  | GD           | Dupl | somatic                          |
| 12  | 81007138 | 81113829 | 106691 | SGA          | Dupl | somatic or paternally inherited* |
| 12  | 81007138 | 81113829 | 106691 | II_trimester | Dupl | somatic or paternally inherited* |
| 12  | 81007138 | 81092260 | 85122  | II_trimester | Dupl | somatic or paternally inherited* |
| 12  | 81007138 | 81092260 | 85122  | II_trimester | Dupl | somatic or paternally inherited* |
| 12  | 81009228 | 81091063 | 81835  | LGA          | Dupl | somatic                          |
| 12  | 81009228 | 81117172 | 107944 | PE           | Dupl | somatic                          |
| 12  | 81009228 | 81092260 | 83032  | II_trimester | Dupl | somatic or paternally inherited* |
| 12  | 82068777 | 82147486 | 78709  | II_trimester | Dupl | parental data not available      |
| 12  | 91285124 | 91519855 | 234731 | LGA          | Dupl | somatic                          |
| 12  | 91366648 | 91451940 | 85292  | II_trimester | Dupl | somatic or paternally inherited* |
| 12  | 91495837 | 91519855 | 24018  | normal term  | Dupl | somatic                          |
| 12  | 91495837 | 91519855 | 24018  | PE           | Dupl | somatic                          |
| 12  | 91495837 | 91519855 | 24018  | PE           | Dupl | somatic                          |
| 12  | 91495837 | 91519855 | 24018  | GD           | Dupl | somatic                          |
| 12  | 91495837 | 91509148 | 13311  | LGA          | Dupl | somatic or paternally inherited* |
| 12  | 91495837 | 91519855 | 24018  | II_trimester | Dupl | somatic or paternally inherited* |



| Chr | Start     | End       | Length  | Group        | Type | Inherited/somatic                |
|-----|-----------|-----------|---------|--------------|------|----------------------------------|
| 12  | 93265078  | 93384142  | 119064  | LGA          | Del  | somatic                          |
| 12  | 93279438  | 93352785  | 73347   | II_trimester | Del  | somatic or paternally inherited* |
| 12  | 101797976 | 101962012 | 164036  | II_trimester | Del  | somatic or paternally inherited* |
| 12  | 101820622 | 101949222 | 128600  | II_trimester | Del  | somatic or paternally inherited* |
| 12  | 101820622 | 101962012 | 141390  | II_trimester | Del  | somatic or paternally inherited* |
| 12  | 102214030 | 102312229 | 98199   | II_trimester | Del  | somatic or paternally inherited* |
| 12  | 124786088 | 124987620 | 201532  | normal term  | Dupl | somatic                          |
| 12  | 124786088 | 124986454 | 200366  | II_trimester | Dupl | somatic or paternally inherited* |
| 12  | 124790517 | 124987620 | 197103  | LGA          | Dupl | somatic                          |
| 12  | 131494029 | 131907138 | 413109  | SGA          | Dupl | somatic or paternally inherited* |
| 13  | 20309714  | 20657188  | 347474  | normal term  | Del  | somatic                          |
| 13  | 20309857  | 20596565  | 286708  | LGA          | Del  | somatic                          |
| 13  | 21118720  | 21131210  | 12490   | normal term  | Del  | somatic                          |
| 13  | 22720397  | 22766634  | 46237   | normal term  | Dupl | somatic                          |
| 13  | 23349733  | 23515553  | 165820  | LGA          | Dupl | paternally inherited             |
| 13  | 34140340  | 34143544  | 3204    | GD           | Del  | somatic                          |
| 13  | 35125130  | 35718203  | 593073  | LGA          | Del  | somatic                          |
| 13  | 45811273  | 45864198  | 52925   | GD           | Dupl | paternally inherited             |
| 13  | 58593657  | 58599031  | 5374    | PE           | Del  | paternally inherited             |
| 13  | 58593657  | 58599031  | 5374    | PE           | Del  | somatic                          |
| 13  | 58593657  | 58599031  | 5374    | II_trimester | Del  | somatic or paternally inherited* |
| 13  | 63982375  | 64005461  | 23086   | LGA          | Dupl | somatic                          |
| 13  | 67770568  | 67799329  | 28761   | II_trimester | Dupl | somatic or paternally inherited* |
| 13  | 69252995  | 69267981  | 14986   | normal term  | Del  | maternally inherited             |
| 13  | 69276739  | 69456954  | 180215  | SGA          | Dupl | somatic                          |
| 13  | 70711212  | 70794045  | 82833   | normal term  | Dupl | somatic                          |
| 13  | 70711212  | 70794045  | 82833   | SGA          | Dupl | somatic                          |
| 13  | 70712321  | 70794045  | 81724   | GD           | Dupl | somatic                          |
| 13  | 70723292  | 70763597  | 40305   | normal term  | Dupl | somatic                          |
| 13  | 70744882  | 70773398  | 28516   | I_trimester  | Del  | maternally inherited             |
| 13  | 71275838  | 71353149  | 77311   | II_trimester | Dupl | somatic or paternally inherited* |
| 13  | 71296379  | 71353149  | 56770   | normal term  | Dupl | somatic                          |
| 13  | 83187066  | 83228160  | 41094   | SGA          | Dupl | somatic                          |
| 13  | 84103707  | 84157926  | 54219   | I_trimester  | Del  | maternally inherited             |
| 13  | 84111773  | 84157927  | 46154   | I_trimester  | Del  | maternally inherited             |
| 13  | 85526856  | 85604405  | 77549   | SGA          | Dupl | somatic                          |
| 13  | 90355058  | 90490883  | 135825  | II_trimester | Dupl | maternally inherited             |
| 13  | 90707864  | 90735758  | 27894   | II_trimester | Dupl | somatic or paternally inherited* |
| 13  | 99753285  | 99840875  | 87590   | LGA          | Del  | somatic                          |
| 13  | 100615239 | 100648099 | 32860   | LGA          | Dupl | somatic                          |
| 13  | 100666633 | 100776268 | 109635  | LGA          | Del  | somatic                          |
| 13  | 102472119 | 102538302 | 66183   | normal term  | Dupl | somatic                          |
| 14  | 19327823  | 20676314  | 1348491 | PE           | Dupl | somatic                          |
| 14  | 20213937  | 20420338  | 206401  | II_trimester | Dupl | somatic or paternally inherited* |
| 14  | 20534909  | 20549093  | 14184   | normal term  | Del  | somatic                          |
| 14  | 25278154  | 25333115  | 54961   | normal term  | Dupl | somatic                          |
| 14  | 29762149  | 30024303  | 262154  | I trimester  | Dupl | somatic or paternally inherited* |

| Chr | Start     | End       | Length  | Group        | Type | Inherited/somatic                |
|-----|-----------|-----------|---------|--------------|------|----------------------------------|
| 14  | 34953379  | 34996507  | 43128   | II_trimester | Del  | parental data not available      |
| 14  | 35766029  | 35795544  | 29515   | LGA          | Del  | somatic                          |
| 14  | 40162494  | 40491964  | 329470  | LGA          | Del  | somatic                          |
| 14  | 40364644  | 40461852  | 97208   | I_trimester  | Del  | somatic or paternally inherited* |
| 14  | 41476279  | 41667839  | 191560  | LGA          | Del  | somatic                          |
| 14  | 44507151  | 44613782  | 106631  | normal term  | Dupl | somatic                          |
| 14  | 47181164  | 47396215  | 215051  | II_trimester | Dupl | parental data not available      |
| 14  | 47181164  | 47408344  | 227180  | SGA          | Dupl | somatic                          |
| 14  | 47181164  | 47408344  | 227180  | II_trimester | Dupl | somatic or paternally inherited* |
| 14  | 47181164  | 47409115  | 227951  | II_trimester | Dupl | somatic or paternally inherited* |
| 14  | 47188267  | 47408344  | 220077  | normal term  | Dupl | somatic                          |
| 14  | 47249450  | 47409115  | 159665  | normal term  | Dupl | somatic                          |
| 14  | 47310983  | 47408344  | 97361   | normal term  | Dupl | somatic                          |
| 14  | 47310983  | 47409115  | 98132   | PE           | Dupl | somatic                          |
| 14  | 47320923  | 47409115  | 88192   | normal term  | Dupl | somatic                          |
| 14  | 47320923  | 47409115  | 88192   | LGA          | Dupl | somatic                          |
| 14  | 50109177  | 50199883  | 90706   | normal term  | Del  | somatic                          |
| 14  | 54425241  | 54527202  | 101961  | LGA          | Del  | somatic                          |
| 14  | 56103882  | 56173687  | 69805   | II_trimester | Dupl | parental data not available      |
| 14  | 56103882  | 56166871  | 62989   | normal term  | Dupl | somatic                          |
| 14  | 56103882  | 56150151  | 46269   | normal term  | Dupl | somatic                          |
| 14  | 58860893  | 58921398  | 60505   | II_trimester | Del  | somatic or paternally inherited* |
| 14  | 62557934  | 62613179  | 55245   | I_trimester  | Dupl | somatic or paternally inherited* |
| 14  | 62650341  | 62734866  | 84525   | SGA          | Del  | maternally inherited             |
| 14  | 63926572  | 64474188  | 547616  | normal term  | Del  | somatic                          |
| 14  | 84142036  | 84223764  | 81728   | normal term  | Dupl | somatic                          |
| 14  | 84142036  | 84223764  | 81728   | PE           | Dupl | somatic                          |
| 14  | 84142036  | 84223764  | 81728   | II_trimester | Dupl | somatic or paternally inherited* |
| 14  | 84159255  | 84223764  | 64509   | normal term  | Dupl | somatic                          |
| 14  | 84159255  | 84223764  | 64509   | II_trimester | Dupl | somatic or paternally inherited* |
| 14  | 86451688  | 86481388  | 29700   | I_trimester  | Del  | somatic or paternally inherited* |
| 14  | 86458414  | 86481388  | 22974   | GD           | Del  | paternally inherited             |
| 14  | 93395086  | 93506806  | 111720  | normal term  | Dupl | somatic                          |
| 14  | 93398849  | 93609385  | 210536  | II_trimester | Dupl | somatic or paternally inherited* |
| 14  | 96742603  | 96858571  | 115968  | II_trimester | Dupl | parental data not available      |
| 14  | 99977347  | 100064674 | 87327   | LGA          | Dupl | somatic                          |
| 14  | 105473229 | 107287663 | 1814434 | normal term  | Dupl | somatic                          |
| 14  | 105617042 | 105685865 | 68823   | normal term  | Dupl | somatic                          |
| 14  | 105617042 | 107287663 | 1670621 | PE           | Dupl | somatic                          |
| 14  | 105660766 | 105685865 | 25099   | LGA          | Dupl | somatic                          |
| 14  | 105805055 | 107287663 | 1482608 | LGA          | Dupl | somatic                          |
| 14  | 105828768 | 107287663 | 1458895 | II_trimester | Dupl | maternally inherited             |
| 14  | 105970176 | 107287663 | 1317487 | normal term  | Dupl | somatic                          |
| 14  | 106047905 | 107287663 | 1239758 | I_trimester  | Dupl | somatic or paternally inherited* |
| 14  | 106326623 | 106949307 | 622684  | LGA          | Dupl | somatic                          |
| 14  | 106326623 | 106949307 | 622684  | LGA          | Dupl | somatic                          |
| 14  | 106326623 | 106949307 | 622684  | II_trimester | Dupl | somatic or paternally inherited* |

| Chr | Start     | End       | Length | Group        | Type | Inherited/somatic                |
|-----|-----------|-----------|--------|--------------|------|----------------------------------|
| 14  | 106326623 | 106949307 | 622684 | I_trimester  | Dupl | somatic or paternally inherited* |
| 14  | 106326623 | 106949307 | 622684 | I_trimester  | Dupl | somatic or paternally inherited* |
| 14  | 106350394 | 106949307 | 598913 | II_trimester | Dupl | somatic or paternally inherited* |
| 14  | 106350394 | 106949307 | 598913 | II_trimester | Dupl | somatic or paternally inherited* |
| 15  | 24050258  | 24061497  | 11239  | I_trimester  | Del  | somatic or paternally inherited* |
| 15  | 24594816  | 24668007  | 73191  | PE           | Dupl | paternally inherited             |
| 15  | 24619900  | 24668007  | 48107  | GD           | Dupl | maternally inherited             |
| 15  | 24619900  | 24714849  | 94949  | normal term  | Dupl | somatic                          |
| 15  | 25174628  | 25188893  | 14265  | normal term  | Del  | somatic                          |
| 15  | 25176516  | 25188893  | 12377  | normal term  | Del  | somatic                          |
| 15  | 25330884  | 25494107  | 163223 | normal term  | Dupl | somatic                          |
| 15  | 25339336  | 25413557  | 74221  | normal term  | Dupl | somatic                          |
| 15  | 25345694  | 25420977  | 75283  | II_trimester | Dupl | parental data not available      |
| 15  | 25420977  | 25430242  | 9265   | I_trimester  | Del  | maternally inherited             |
| 15  | 25420977  | 25430242  | 9265   | normal term  | Del  | somatic                          |
| 15  | 30899133  | 31089526  | 190393 | PE           | Del  | maternally inherited             |
| 15  | 35764098  | 35849809  | 85711  | I_trimester  | Dupl | somatic or paternally inherited* |
| 15  | 35787824  | 35849809  | 61985  | II_trimester | Dupl | somatic or paternally inherited* |
| 15  | 35787824  | 35849809  | 61985  | II_trimester | Dupl | somatic or paternally inherited* |
| 15  | 37437248  | 37501850  | 64602  | SGA          | Del  | paternally inherited             |
| 15  | 41288278  | 41739356  | 451078 | LGA          | Del  | somatic                          |
| 15  | 41444953  | 41774423  | 329470 | LGA          | Del  | somatic                          |
| 15  | 42684455  | 42961680  | 277225 | II_trimester | Del  | somatic or paternally inherited* |
| 15  | 42758737  | 42961680  | 202943 | normal term  | Del  | somatic                          |
| 15  | 42758737  | 42950297  | 191560 | LGA          | Del  | somatic                          |
| 15  | 48401875  | 48521916  | 120041 | II_trimester | Dupl | parental data not available      |
| 15  | 48416359  | 48481665  | 65306  | normal term  | Dupl | somatic                          |
| 15  | 50806469  | 51162261  | 355792 | PE           | Del  | somatic                          |
| 15  | 50944589  | 51162261  | 217672 | normal term  | Del  | somatic                          |
| 15  | 55707699  | 55809660  | 101961 | LGA          | Del  | somatic                          |
| 15  | 59862200  | 59926946  | 64746  | II_trimester | Del  | somatic or paternally inherited* |
| 15  | 65739682  | 65833174  | 93492  | LGA          | Del  | somatic                          |
| 15  | 74968873  | 75007799  | 38926  | normal term  | Del  | somatic                          |
| 15  | 87209767  | 87225334  | 15567  | normal term  | Dupl | somatic                          |
| 15  | 87210674  | 87225334  | 14660  | normal term  | Dupl | somatic                          |
| 15  | 87832130  | 87863715  | 31585  | PE           | Del  | maternally inherited             |
| 15  | 89459378  | 89537952  | 78574  | LGA          | Del  | somatic                          |
| 15  | 97815710  | 97830540  | 14830  | SGA          | Del  | somatic                          |
| 15  | 100389182 | 100421490 | 32308  | II_trimester | Dupl | parental data not available      |
| 15  | 100389182 | 100415574 | 26392  | SGA          | Dupl | somatic                          |
| 15  | 100389182 | 100415574 | 26392  | LGA          | Dupl | somatic                          |
| 15  | 100389182 | 100445766 | 56584  | PE           | Dupl | somatic                          |
| 15  | 100389182 | 100421490 | 32308  | GD           | Dupl | somatic                          |
| 15  | 100389182 | 100415574 | 26392  | II_trimester | Dupl | somatic or paternally inherited* |
| 15  | 100389182 | 100421490 | 32308  | II_trimester | Dupl | somatic or paternally inherited* |
| 15  | 100389182 | 100415574 | 26392  | II_trimester | Dupl | somatic or paternally inherited* |
| 15  | 102366849 | 102461162 | 94313  | normal term  | Dupl | somatic                          |

| Chr | Start     | End       | Length | Group        | Type | Inherited/somatic                |
|-----|-----------|-----------|--------|--------------|------|----------------------------------|
| 15  | 102366849 | 102461162 | 94313  | LGA          | Dupl | somatic                          |
| 15  | 102366849 | 102461162 | 94313  | PE           | Dupl | somatic                          |
| 15  | 102366849 | 102461162 | 94313  | II_trimester | Dupl | somatic or paternally inherited* |
| 15  | 102366849 | 102461162 | 94313  | I_trimester  | Dupl | somatic or paternally inherited* |
| 15  | 102376761 | 102461162 | 84401  | I_trimester  | Dupl | somatic or paternally inherited* |
| 16  | 88164     | 136257    | 48093  | normal term  | Dupl | somatic                          |
| 16  | 88164     | 163666    | 75502  | II_trimester | Dupl | somatic or paternally inherited* |
| 16  | 570623    | 917766    | 347143 | normal term  | Dupl | somatic                          |
| 16  | 572044    | 855716    | 283672 | II_trimester | Dupl | somatic or paternally inherited* |
| 16  | 575312    | 848755    | 273443 | LGA          | Dupl | somatic                          |
| 16  | 1889714   | 1934183   | 44469  | normal term  | Del  | somatic                          |
| 16  | 1889714   | 1934183   | 44469  | LGA          | Del  | somatic                          |
| 16  | 10149904  | 10164598  | 14694  | PE           | Del  | paternally inherited             |
| 16  | 10315838  | 10591887  | 276049 | normal term  | Del  | somatic                          |
| 16  | 12679096  | 12730650  | 51554  | normal term  | Del  | paternally inherited             |
| 16  | 12686917  | 12737141  | 50224  | II_trimester | Del  | parental data not available      |
| 16  | 14724589  | 14771788  | 47199  | LGA          | Del  | somatic                          |
| 16  | 14724589  | 14771788  | 47199  | PE           | Del  | somatic                          |
| 16  | 18920881  | 19085297  | 164416 | PE           | Del  | somatic                          |
| 16  | 18920881  | 19173725  | 252844 | II_trimester | Del  | somatic or paternally inherited* |
| 16  | 18929829  | 19109992  | 180163 | SGA          | Del  | somatic                          |
| 16  | 18982685  | 18994925  | 12240  | LGA          | Del  | somatic                          |
| 16  | 19950501  | 19955468  | 4967   | PE           | Del  | somatic                          |
| 16  | 20521796  | 20532514  | 10718  | normal term  | Del  | maternally inherited             |
| 16  | 24508117  | 24728783  | 220666 | II_trimester | Del  | somatic or paternally inherited* |
| 16  | 24588283  | 24740128  | 151845 | LGA          | Del  | somatic                          |
| 16  | 28484556  | 28528623  | 44067  | II_trimester | Del  | parental data not available      |
| 16  | 28484556  | 28528623  | 44067  | LGA          | Del  | somatic                          |
| 16  | 30132387  | 30192561  | 60174  | LGA          | Del  | somatic                          |
| 16  | 30132387  | 30198151  | 65764  | II_trimester | Del  | somatic or paternally inherited* |
| 16  | 30415599  | 30518095  | 102496 | LGA          | Del  | somatic                          |
| 16  | 34241109  | 34766518  | 525409 | PE           | Dupl | somatic                          |
| 16  | 47276820  | 47583872  | 307052 | I_trimester  | Dupl | parental data not available      |
| 16  | 50089192  | 50252235  | 163043 | LGA          | Del  | somatic                          |
| 16  | 55843251  | 55867738  | 24487  | normal term  | Dupl | somatic                          |
| 16  | 58589187  | 58821534  | 232347 | normal term  | Del  | somatic                          |
| 16  | 58599527  | 58864314  | 264787 | LGA          | Del  | somatic                          |
| 16  | 58629468  | 58741850  | 112382 | LGA          | Del  | somatic                          |
| 16  | 68127278  | 68175423  | 48145  | LGA          | Del  | somatic                          |
| 16  | 70285901  | 70464818  | 178917 | LGA          | Del  | somatic                          |
| 16  | 70303579  | 70471827  | 168248 | normal term  | Del  | somatic                          |
| 16  | 71292172  | 71319646  | 27474  | SGA          | Dupl | somatic                          |
| 16  | 71697752  | 72022941  | 325189 | LGA          | Del  | somatic                          |
| 16  | 71697752  | 72078906  | 381154 | LGA          | Del  | somatic                          |
| 16  | 72723613  | 72785303  | 61690  | GD           | Del  | paternally inherited             |
| 16  | 78077430  | 78224186  | 146756 | II_trimester | Del  | somatic or paternally inherited* |
| 16  | 88116130  | 88570383  | 454253 | II_trimester | Dupl | somatic or paternally inherited* |

| Chr | Start    | End      | Length  | Group        | Type | Inherited/somatic                |
|-----|----------|----------|---------|--------------|------|----------------------------------|
| 17  | 3505233  | 3564068  | 58835   | II_trimester | Del  | maternally inherited             |
| 17  | 4179295  | 4406973  | 227678  | normal term  | Del  | somatic                          |
| 17  | 16032006 | 16422727 | 390721  | I_trimester  | Del  | somatic or paternally inherited* |
| 17  | 16036593 | 16178778 | 142185  | normal term  | Del  | somatic                          |
| 17  | 16036593 | 16422727 | 386134  | II_trimester | Del  | somatic or paternally inherited* |
| 17  | 16058110 | 16263213 | 205103  | LGA          | Del  | somatic                          |
| 17  | 16058110 | 16187802 | 129692  | LGA          | Del  | somatic                          |
| 17  | 16058110 | 16355043 | 296933  | SGA          | Del  | somatic or paternally inherited* |
| 17  | 16058110 | 16246016 | 187906  | II_trimester | Del  | somatic or paternally inherited* |
| 17  | 16127206 | 16246016 | 118810  | II_trimester | Del  | somatic or paternally inherited* |
| 17  | 17155873 | 17249887 | 94014   | II_trimester | Del  | somatic or paternally inherited* |
| 17  | 18677329 | 18851012 | 173683  | LGA          | Del  | somatic                          |
| 17  | 18699071 | 18830123 | 131052  | normal term  | Del  | somatic                          |
| 17  | 22034501 | 22142172 | 107671  | SGA          | Dupl | somatic                          |
| 17  | 27081160 | 27187636 | 106476  | LGA          | Del  | somatic or paternally inherited* |
| 17  | 27081160 | 27187636 | 106476  | II_trimester | Del  | somatic or paternally inherited* |
| 17  | 27084364 | 27187636 | 103272  | normal term  | Del  | somatic                          |
| 17  | 27084364 | 27187636 | 103272  | PE           | Del  | somatic                          |
| 17  | 27084364 | 27255191 | 170827  | PE           | Del  | somatic                          |
| 17  | 27091951 | 27187636 | 95685   | normal term  | Del  | somatic                          |
| 17  | 27091951 | 27187636 | 95685   | SGA          | Del  | somatic                          |
| 17  | 27091951 | 27187636 | 95685   | SGA          | Del  | somatic or paternally inherited* |
| 17  | 27123816 | 27182944 | 59128   | PE           | Del  | somatic                          |
| 17  | 27123816 | 27194634 | 70818   | normal term  | Del  | somatic                          |
| 17  | 27123816 | 27187636 | 63820   | LGA          | Del  | somatic                          |
| 17  | 27123816 | 27187636 | 63820   | LGA          | Del  | somatic                          |
| 17  | 27123816 | 27187636 | 63820   | II_trimester | Del  | somatic or paternally inherited* |
| 17  | 27611880 | 27891864 | 279984  | normal term  | Del  | somatic                          |
| 17  | 28967865 | 29521832 | 553967  | PE           | Del  | somatic                          |
| 17  | 33684035 | 33769883 | 85848   | I_trimester  | Del  | somatic or paternally inherited* |
| 17  | 37403979 | 37609119 | 205140  | normal term  | Del  | somatic                          |
| 17  | 37436711 | 37682657 | 245946  | II_trimester | Del  | somatic or paternally inherited* |
| 17  | 38374131 | 38446564 | 72433   | LGA          | Del  | somatic                          |
| 17  | 38386114 | 38460374 | 74260   | LGA          | Del  | somatic                          |
| 17  | 44165803 | 44352131 | 186328  | LGA          | Dupl | maternally inherited             |
| 17  | 45583375 | 45764692 | 181317  | normal term  | Del  | somatic                          |
| 17  | 45583375 | 45730501 | 147126  | LGA          | Del  | somatic                          |
| 17  | 56585871 | 57691502 | 1105631 | PE           | Del  | somatic                          |
| 17  | 57783934 | 58024274 | 240340  | normal term  | Del  | somatic                          |
| 17  | 57783934 | 58024324 | 240390  | LGA          | Del  | somatic                          |
| 17  | 58218881 | 58809767 | 590886  | LGA          | Del  | somatic                          |
| 17  | 65762341 | 65821166 | 58825   | II_trimester | Del  | somatic or paternally inherited* |
| 17  | 74740399 | 74820856 | 80457   | LGA          | Del  | somatic                          |
| 17  | 74740399 | 74828784 | 88385   | LGA          | Del  | somatic                          |
| 17  | 74774824 | 74828784 | 53960   | normal term  | Del  | somatic                          |
| 17  | 77361176 | 77404093 | 42917   | LGA          | Dupl | paternally inherited             |
| 17  | 77361176 | 77394037 | 32861   | PE           | Dupl | somatic                          |

| Chr | Start    | End      | Length | Group        | Type | Inherited/somatic                |
|-----|----------|----------|--------|--------------|------|----------------------------------|
| 18  | 9922512  | 9965338  | 42826  | II_trimester | Dupl | parental data not available      |
| 18  | 12053552 | 12132247 | 78695  | II_trimester | Dupl | parental data not available      |
| 18  | 12053552 | 12132247 | 78695  | normal term  | Dupl | somatic                          |
| 18  | 12053552 | 12132247 | 78695  | SGA          | Dupl | somatic or paternally inherited* |
| 18  | 12056850 | 12132247 | 75397  | II_trimester | Dupl | somatic or paternally inherited* |
| 18  | 12083314 | 12132247 | 48933  | normal term  | Dupl | somatic                          |
| 18  | 12083314 | 12132247 | 48933  | GD           | Dupl | somatic                          |
| 18  | 12083314 | 12132247 | 48933  | II_trimester | Dupl | somatic or paternally inherited* |
| 18  | 12096249 | 12132247 | 35998  | PE           | Dupl | somatic                          |
| 18  | 12096249 | 12132247 | 35998  | II_trimester | Dupl | somatic or paternally inherited* |
| 18  | 12096249 | 12132247 | 35998  | II_trimester | Dupl | somatic or paternally inherited* |
| 18  | 20919574 | 21080674 | 161100 | normal term  | Del  | somatic                          |
| 18  | 23759474 | 23840837 | 81363  | II_trimester | Del  | somatic or paternally inherited* |
| 18  | 24454351 | 24519923 | 65572  | LGA          | Dupl | somatic                          |
| 18  | 24493117 | 24498544 | 5427   | normal term  | Dupl | somatic                          |
| 18  | 24493117 | 24498689 | 5572   | II_trimester | Dupl | somatic or paternally inherited* |
| 18  | 24493424 | 24498427 | 5003   | normal term  | Dupl | somatic                          |
| 18  | 26140557 | 26174416 | 33859  | SGA          | Dupl | somatic                          |
| 18  | 29488804 | 29687013 | 198209 | PE           | Del  | somatic                          |
| 18  | 29527884 | 29711260 | 183376 | normal term  | Del  | somatic                          |
| 18  | 29554990 | 29687013 | 132023 | LGA          | Del  | somatic                          |
| 18  | 38573994 | 38695982 | 121988 | normal term  | Dupl | somatic                          |
| 18  | 38573994 | 38630544 | 56550  | SGA          | Dupl | somatic                          |
| 18  | 38573994 | 38632365 | 58371  | GD           | Dupl | somatic                          |
| 18  | 38573994 | 38630544 | 56550  | I_trimester  | Dupl | somatic or paternally inherited* |
| 18  | 40365619 | 40488279 | 122660 | PE           | Dupl | somatic                          |
| 18  | 40475051 | 40488279 | 13228  | II_trimester | Dupl | somatic or paternally inherited* |
| 18  | 40475218 | 40488279 | 13061  | SGA          | Dupl | somatic                          |
| 18  | 40945960 | 41083535 | 137575 | I_trimester  | Dupl | somatic or paternally inherited* |
| 18  | 63729570 | 63730950 | 1380   | normal term  | Del  | somatic                          |
| 18  | 63729570 | 63730950 | 1380   | PE           | Del  | somatic                          |
| 18  | 63729570 | 63730950 | 1380   | LGA          | Del  | somatic or paternally inherited* |
| 18  | 64158664 | 64210748 | 52084  | II_trimester | Dupl | parental data not available      |
| 18  | 64166846 | 64245402 | 78556  | II_trimester | Dupl | somatic or paternally inherited* |
| 18  | 64166846 | 64210748 | 43902  | II_trimester | Dupl | somatic or paternally inherited* |
| 18  | 64171511 | 64175267 | 3756   | SGA          | Dupl | somatic                          |
| 18  | 65252640 | 65692392 | 439752 | LGA          | Dupl | paternally inherited             |
| 18  | 65537177 | 65608116 | 70939  | SGA          | Dupl | somatic                          |
| 18  | 66747568 | 66755508 | 7940   | LGA          | Del  | paternally inherited             |
| 18  | 66747568 | 66755508 | 7940   | I_trimester  | Del  | maternally inherited             |
| 18  | 75389907 | 75455105 | 65198  | normal term  | Dupl | somatic                          |
| 18  | 75408509 | 75455105 | 46596  | normal term  | Dupl | somatic                          |
| 18  | 75408509 | 75455105 | 46596  | I_trimester  | Dupl | somatic or paternally inherited* |
| 18  | 77173979 | 77251061 | 77082  | LGA          | Dupl | somatic                          |
| 18  | 77914537 | 77926197 | 11660  | normal term  | Dupl | somatic                          |
| 18  | 77914537 | 77931598 | 17061  | GD           | Dupl | somatic                          |
| 19  | 4718201  | 4848593  | 130392 | SGA          | Del  | somatic                          |

| Chr | Start    | End      | Length | Group        | Type | Inherited/somatic                |
|-----|----------|----------|--------|--------------|------|----------------------------------|
| 19  | 9119242  | 9380978  | 261736 | PE           | Del  | somatic                          |
| 19  | 15570931 | 15645620 | 74689  | II_trimester | Del  | somatic or paternally inherited* |
| 19  | 20621828 | 20729120 | 107292 | SGA          | Del  | maternally inherited             |
| 19  | 20621828 | 20715228 | 93400  | PE           | Del  | paternally inherited             |
| 19  | 20621828 | 20715228 | 93400  | SGA          | Del  | somatic                          |
| 19  | 20621828 | 20715228 | 93400  | II_trimester | Del  | somatic or paternally inherited* |
| 19  | 22121293 | 22158992 | 37699  | II_trimester | Dupl | somatic or paternally inherited* |
| 19  | 22143339 | 22175566 | 32227  | I_trimester  | Dupl | somatic or paternally inherited* |
| 19  | 27763440 | 28079145 | 315705 | I_trimester  | Del  | somatic or paternally inherited* |
| 19  | 33872410 | 33921542 | 49132  | normal term  | Dupl | somatic                          |
| 19  | 35661787 | 35665514 | 3727   | II_trimester | Del  | somatic or paternally inherited* |
| 19  | 35856925 | 35861695 | 4770   | LGA          | Del  | somatic                          |
| 19  | 35856925 | 35861695 | 4770   | II_trimester | Del  | somatic or paternally inherited* |
| 19  | 41341588 | 41384577 | 42989  | normal term  | Del  | somatic                          |
| 19  | 41350894 | 41383827 | 32933  | PE           | Del  | paternally inherited             |
| 19  | 41350894 | 41384577 | 33683  | I_trimester  | Del  | somatic or paternally inherited* |
| 19  | 43328006 | 43866823 | 538817 | normal term  | Dupl | somatic                          |
| 19  | 43371294 | 43699208 | 327914 | I_trimester  | Del  | maternally inherited             |
| 19  | 43372386 | 43770566 | 398180 | normal term  | Del  | maternally inherited             |
| 19  | 43372386 | 43539189 | 166803 | II_trimester | Del  | somatic or paternally inherited* |
| 19  | 43663086 | 43845593 | 182507 | I_trimester  | Del  | maternally inherited             |
| 19  | 49084056 | 49092429 | 8373   | PE           | Del  | somatic                          |
| 19  | 54253212 | 54303712 | 50500  | I_trimester  | Del  | somatic or paternally inherited* |
| 20  | 4906003  | 5046930  | 140927 | II_trimester | Del  | somatic or paternally inherited* |
| 20  | 5020237  | 5046930  | 26693  | LGA          | Del  | somatic                          |
| 20  | 7288480  | 7326701  | 38221  | normal term  | Dupl | somatic                          |
| 20  | 7288480  | 7326701  | 38221  | LGA          | Dupl | somatic                          |
| 20  | 7288480  | 7326701  | 38221  | PE           | Dupl | somatic                          |
| 20  | 7288480  | 7326701  | 38221  | II_trimester | Dupl | somatic or paternally inherited* |
| 20  | 9069657  | 9078936  | 9279   | normal term  | Dupl | somatic                          |
| 20  | 11044604 | 11061145 | 16541  | normal term  | Dupl | somatic                          |
| 20  | 12807016 | 12901895 | 94879  | SGA          | Dupl | somatic                          |
| 20  | 14568758 | 14576448 | 7690   | II_trimester | Dupl | somatic or paternally inherited* |
| 20  | 29804293 | 29874664 | 70371  | II_trimester | Del  | parental data not available      |
| 20  | 29804293 | 29820178 | 15885  | normal term  | Del  | somatic                          |
| 20  | 29804293 | 29874664 | 70371  | GD           | Del  | somatic                          |
| 20  | 29804293 | 29874664 | 70371  | II_trimester | Del  | somatic or paternally inherited* |
| 20  | 29804293 | 29843182 | 38889  | II_trimester | Del  | somatic or paternally inherited* |
| 20  | 34378692 | 34501092 | 122400 | LGA          | Del  | somatic                          |
| 20  | 34378692 | 34499368 | 120676 | II_trimester | Del  | somatic or paternally inherited* |
| 20  | 45726192 | 46208604 | 482412 | II_trimester | Del  | somatic or paternally inherited* |
| 20  | 45877226 | 46208604 | 331378 | PE           | Del  | somatic                          |
| 20  | 46000938 | 46208604 | 207666 | normal term  | Del  | somatic                          |
| 20  | 46000938 | 46208604 | 207666 | PE           | Del  | somatic                          |
| 20  | 46000938 | 46186571 | 185633 | II_trimester | Del  | somatic or paternally inherited* |
| 20  | 46000938 | 46190401 | 189463 | II_trimester | Del  | somatic or paternally inherited* |
| 20  | 52648368 | 52654547 | 6179   | I_trimester  | Del  | somatic or paternally inherited* |

| Chr | Start    | End      | Length | Group        | Type | Inherited/somatic                |
|-----|----------|----------|--------|--------------|------|----------------------------------|
| 20  | 55902423 | 55940426 | 38003  | normal term  | Dupl | somatic                          |
| 20  | 55904180 | 55940426 | 36246  | normal term  | Dupl | somatic                          |
| 20  | 55904180 | 55940426 | 36246  | II_trimester | Dupl | somatic or paternally inherited* |
| 20  | 59113601 | 59122693 | 9092   | GD           | Del  | somatic                          |
| 20  | 62038276 | 62053754 | 15478  | normal term  | Dupl | somatic                          |
| 20  | 62038276 | 62053754 | 15478  | LGA          | Dupl | somatic                          |
| 20  | 62038276 | 62065610 | 27334  | GD           | Dupl | somatic                          |
| 20  | 62038276 | 62078487 | 40211  | GD           | Dupl | somatic                          |
| 20  | 62038276 | 62053754 | 15478  | II_trimester | Dupl | somatic or paternally inherited* |
| 20  | 62038276 | 62053754 | 15478  | II_trimester | Dupl | somatic or paternally inherited* |
| 21  | 17618519 | 17640790 | 22271  | II_trimester | Dupl | somatic or paternally inherited* |
| 21  | 17624130 | 17659790 | 35660  | GD           | Dupl | somatic                          |
| 21  | 20296849 | 20342267 | 45418  | normal term  | Dupl | somatic                          |
| 21  | 22821643 | 22922109 | 100466 | II_trimester | Dupl | somatic or paternally inherited* |
| 21  | 23655900 | 23661835 | 5935   | II_trimester | Del  | somatic or paternally inherited* |
| 21  | 27163338 | 27216357 | 53019  | SGA          | Del  | somatic                          |
| 21  | 37348480 | 37452918 | 104438 | II_trimester | Del  | somatic or paternally inherited* |
| 22  | 18886915 | 19008108 | 121193 | normal term  | Del  | maternally inherited             |
| 22  | 19223352 | 19337633 | 114281 | LGA          | Del  | somatic                          |
| 22  | 19223352 | 19362142 | 138790 | LGA          | Del  | somatic                          |
| 22  | 19228736 | 19310812 | 82076  | normal term  | Del  | somatic                          |
| 22  | 25632266 | 25899939 | 267673 | normal term  | Dupl | somatic                          |
| 22  | 29087040 | 29258551 | 171511 | normal term  | Del  | somatic                          |
| 22  | 36409990 | 36525981 | 115991 | LGA          | Del  | somatic                          |
| 22  | 36409990 | 36525981 | 115991 | PE           | Del  | somatic                          |
| 22  | 36409990 | 36525981 | 115991 | PE           | Del  | somatic                          |
| 22  | 36427483 | 36525981 | 98498  | II_trimester | Del  | somatic or paternally inherited* |
| 22  | 36433816 | 36525981 | 92165  | II_trimester | Del  | somatic or paternally inherited* |
| 22  | 36438470 | 36525981 | 87511  | II_trimester | Del  | somatic or paternally inherited* |
| 22  | 40880692 | 41610059 | 729367 | LGA          | Del  | somatic                          |
| 22  | 46598306 | 46608917 | 10611  | II_trimester | Del  | somatic or paternally inherited* |
| 22  | 50793661 | 50853626 | 59965  | normal term  | Del  | somatic                          |

## b. Parental CNVs

| Chr | Start    | End      | Length | Group       | Type | Mother/father |
|-----|----------|----------|--------|-------------|------|---------------|
| 1   | 1385211  | 1439671  | 54460  | SGA         | Del  | father        |
| 1   | 1385211  | 1439671  | 54460  | LGA         | Del  | mother        |
| 1   | 1619541  | 1664124  | 44583  | LGA         | Del  | father        |
| 1   | 1627987  | 1664124  | 36137  | I_trimester | Del  | mother        |
| 1   | 2352146  | 2366316  | 14170  | GD          | Dupl | father        |
| 1   | 2358944  | 2369498  | 10554  | SGA         | Dupl | father        |
| 1   | 3411413  | 3431235  | 19822  | PE          | Dupl | mother        |
| 1   | 12880153 | 12913896 | 33743  | LGA         | Del  | mother        |
| 1   | 15783771 | 15796808 | 13037  | normal term | Del  | mother        |
| 1   | 15794011 | 15814186 | 20175  | normal term | Del  | mother        |
| 1   | 25598276 | 25655538 | 57262  | GD          | Del  | father        |



| Chr | Start     | End       | Length | Group        | Type | Mother/father |
|-----|-----------|-----------|--------|--------------|------|---------------|
| 1   | 25598276  | 25655538  | 57262  | II_trimester | Del  | mother        |
| 1   | 25598276  | 25655538  | 57262  | I_trimester  | Del  | mother        |
| 1   | 36367780  | 36387654  | 19874  | GD           | Del  | father        |
| 1   | 41343608  | 41378076  | 34468  | LGA          | Dupl | mother        |
| 1   | 41343608  | 41378076  | 34468  | PE           | Dupl | father        |
| 1   | 45636892  | 45645069  | 8177   | I_trimester  | Del  | mother        |
| 1   | 49928063  | 49990335  | 62272  | LGA          | Del  | father        |
| 1   | 50863202  | 50874830  | 11628  | SGA          | Del  | mother        |
| 1   | 59024435  | 59086221  | 61786  | SGA          | Del  | mother        |
| 1   | 73011443  | 73086201  | 74758  | LGA          | Del  | father        |
| 1   | 73959879  | 73993804  | 33925  | SGA          | Dupl | father        |
| 1   | 94867056  | 95134903  | 267847 | normal term  | Dupl | mother        |
| 1   | 97435890  | 97454547  | 18657  | PE           | Del  | mother        |
| 1   | 102667388 | 102846147 | 178759 | SGA          | Del  | mother        |
| 1   | 104129880 | 104211046 | 81166  | normal term  | Del  | mother        |
| 1   | 104129880 | 104211046 | 81166  | SGA          | Del  | mother        |
| 1   | 104129880 | 104211046 | 81166  | LGA          | Del  | mother        |
| 1   | 104129880 | 104211046 | 81166  | I_trimester  | Del  | mother        |
| 1   | 104153865 | 104211046 | 57181  | normal term  | Del  | mother        |
| 1   | 104153865 | 104155944 | 2079   | SGA          | Del  | father        |
| 1   | 104153865 | 104211046 | 57181  | LGA          | Del  | father        |
| 1   | 104153865 | 104211046 | 57181  | I_trimester  | Del  | mother        |
| 1   | 111926153 | 111934304 | 8151   | PE           | Del  | mother        |
| 1   | 111926153 | 111944073 | 17920  | GD           | Del  | mother        |
| 1   | 145625979 | 145762959 | 136980 | SGA          | Del  | mother        |
| 1   | 145625979 | 145762959 | 136980 | PE           | Del  | father        |
| 1   | 149039930 | 149201987 | 162057 | normal term  | Del  | father        |
| 1   | 149039930 | 149201987 | 162057 | normal term  | Del  | father        |
| 1   | 149039930 | 149201987 | 162057 | LGA          | Del  | father        |
| 1   | 149039930 | 149201987 | 162057 | LGA          | Del  | mother        |
| 1   | 149039930 | 149201987 | 162057 | GD           | Del  | mother        |
| 1   | 149039930 | 149201987 | 162057 | GD           | Del  | father        |
| 1   | 149060682 | 149201987 | 141305 | GD           | Del  | father        |
| 1   | 158753406 | 158876921 | 123515 | LGA          | Del  | father        |
| 1   | 161492587 | 161501525 | 8938   | SGA          | Del  | father        |
| 1   | 191833819 | 191887735 | 53916  | normal term  | Del  | mother        |
| 1   | 193648643 | 193684171 | 35528  | GD           | Del  | mother        |
| 1   | 196823300 | 196892322 | 69022  | SGA          | Del  | father        |
| 1   | 196823300 | 196887457 | 64157  | LGA          | Del  | father        |
| 1   | 196823300 | 196862569 | 39269  | GD           | Del  | mother        |
| 1   | 212999701 | 213011812 | 12111  | SGA          | Del  | father        |
| 1   | 212999701 | 213011812 | 12111  | I_trimester  | Del  | mother        |
| 1   | 231709404 | 231863204 | 153800 | normal term  | Dupl | father        |
| 1   | 231709404 | 231813134 | 103730 | GD           | Dupl | father        |
| 1   | 231711489 | 231813134 | 101645 | GD           | Dupl | mother        |
| 1   | 236984562 | 237128380 | 143818 | LGA          | Del  | mother        |
| 1   | 239714774 | 239785165 | 70391  | GD           | Dupl | father        |

| Chr | Start     | End       | Length  | Group        | Type | Mother/father |
|-----|-----------|-----------|---------|--------------|------|---------------|
| 1   | 245636915 | 245647726 | 10811   | normal term  | Del  | father        |
| 1   | 245636915 | 245647726 | 10811   | SGA          | Del  | mother        |
| 1   | 245636915 | 245642219 | 5304    | PE           | Del  | father        |
| 2   | 18674     | 189972    | 171298  | GD           | Dupl | mother        |
| 2   | 2864210   | 2916955   | 52745   | normal term  | Dupl | mother        |
| 2   | 4677905   | 5958997   | 1281092 | PE           | Dupl | father        |
| 2   | 13486778  | 13536772  | 49994   | GD           | Dupl | mother        |
| 2   | 14355721  | 14385992  | 30271   | I_trimester  | Dupl | mother        |
| 2   | 35470727  | 35597319  | 126592  | GD           | Del  | father        |
| 2   | 35819686  | 36085059  | 265373  | SGA          | Del  | father        |
| 2   | 39518512  | 39588797  | 70285   | LGA          | Dupl | mother        |
| 2   | 49857938  | 49865140  | 7202    | PE           | Del  | father        |
| 2   | 50268228  | 50276061  | 7833    | GD           | Del  | mother        |
| 2   | 51345474  | 51411126  | 65652   | I_trimester  | Del  | mother        |
| 2   | 51926599  | 51926904  | 305     | PE           | Del  | father        |
| 2   | 51926599  | 51926904  | 305     | PE           | Del  | mother        |
| 2   | 51926599  | 51926904  | 305     | normal term  | Del  | father        |
| 2   | 51926599  | 51926904  | 305     | normal term  | Del  | father        |
| 2   | 51926599  | 51926904  | 305     | normal term  | Del  | mother        |
| 2   | 51926599  | 51926904  | 305     | normal term  | Del  | father        |
| 2   | 51926599  | 51926904  | 305     | normal term  | Del  | father        |
| 2   | 51926599  | 51926904  | 305     | LGA          | Del  | mother        |
| 2   | 51926599  | 51926904  | 305     | LGA          | Del  | mother        |
| 2   | 51926599  | 51926904  | 305     | LGA          | Del  | mother        |
| 2   | 51926599  | 51926904  | 305     | LGA          | Del  | mother        |
| 2   | 51926599  | 51926904  | 305     | PE           | Del  | mother        |
| 2   | 51926599  | 51926904  | 305     | GD           | Del  | mother        |
| 2   | 51926599  | 51926904  | 305     | GD           | Del  | father        |
| 2   | 51926599  | 51926904  | 305     | GD           | Del  | mother        |
| 2   | 51926599  | 51926904  | 305     | GD           | Del  | father        |
| 2   | 51926599  | 51926904  | 305     | II_trimester | Del  | mother        |
| 2   | 64695893  | 64703286  | 7393    | LGA          | Del  | mother        |
| 2   | 76941049  | 76949101  | 8052    | LGA          | Del  | mother        |
| 2   | 89427986  | 90240473  | 812487  | PE           | Dupl | father        |
| 2   | 89427986  | 90240473  | 812487  | LGA          | Dupl | mother        |
| 2   | 89427986  | 91820358  | 2392372 | PE           | Dupl | mother        |
| 2   | 90010895  | 90240473  | 229578  | GD           | Dupl | mother        |
| 2   | 90094257  | 90109261  | 15004   | normal term  | Del  | father        |
| 2   | 90094257  | 90109261  | 15004   | LGA          | Del  | father        |
| 2   | 90094257  | 90109261  | 15004   | PE           | Del  | father        |
| 2   | 100055506 | 100062163 | 6657    | I_trimester  | Dupl | mother        |
| 2   | 100055763 | 100062163 | 6400    | LGA          | Dupl | father        |
| 2   | 100055763 | 100062163 | 6400    | PE           | Dupl | father        |
| 2   | 123818296 | 123878592 | 60296   | I_trimester  | Dupl | mother        |
| 2   | 135972093 | 136231459 | 259366  | GD           | Dupl | mother        |
| 2   | 142073760 | 142078003 | 4243    | PE           | Del  | father        |
| 2   | 142999394 | 143043285 | 43891   | SGA          | Del  | mother        |

| Chr | Start     | End       | Length | Group        | Type | Mother/father |
|-----|-----------|-----------|--------|--------------|------|---------------|
| 2   | 154163944 | 154199490 | 35546  | SGA          | Dupl | father        |
| 2   | 154701808 | 155131619 | 429811 | GD           | Dupl | mother        |
| 2   | 160321788 | 160567537 | 245749 | PE           | Dupl | mother        |
| 2   | 184797826 | 184802609 | 4783   | normal term  | Del  | father        |
| 2   | 184797826 | 184802609 | 4783   | normal term  | Del  | father        |
| 2   | 184797826 | 184802609 | 4783   | GD           | Del  | father        |
| 2   | 184797826 | 184802609 | 4783   | II_trimester | Del  | mother        |
| 2   | 184797826 | 184802609 | 4783   | I_trimester  | Del  | mother        |
| 2   | 184797826 | 184802609 | 4783   | I_trimester  | Del  | mother        |
| 2   | 188435643 | 188530578 | 94935  | SGA          | Del  | mother        |
| 2   | 201843500 | 201971024 | 127524 | normal term  | Dupl | father        |
| 2   | 209034801 | 209050447 | 15646  | SGA          | Del  | father        |
| 2   | 213173172 | 213192268 | 19096  | SGA          | Del  | father        |
| 2   | 213183696 | 213192268 | 8572   | normal term  | Del  | father        |
| 2   | 213183696 | 213192268 | 8572   | normal term  | Del  | mother        |
| 2   | 213183696 | 213192268 | 8572   | LGA          | Del  | mother        |
| 2   | 213183696 | 213190493 | 6797   | GD           | Del  | father        |
| 2   | 213187034 | 213191389 | 4355   | LGA          | Del  | father        |
| 2   | 213187034 | 213191389 | 4355   | II_trimester | Del  | mother        |
| 2   | 213188733 | 213190493 | 1760   | normal term  | Del  | father        |
| 2   | 213635052 | 213657426 | 22374  | LGA          | Del  | father        |
| 2   | 223563574 | 223588671 | 25097  | GD           | Del  | father        |
| 2   | 223798501 | 223823141 | 24640  | PE           | Dupl | father        |
| 2   | 228243310 | 228258288 | 14978  | PE           | Dupl | mother        |
| 2   | 241558936 | 241576626 | 17690  | SGA          | Dupl | mother        |
| 2   | 241558936 | 241576626 | 17690  | GD           | Dupl | mother        |
| 2   | 242812080 | 243048760 | 236680 | LGA          | Del  | mother        |
| 2   | 242873800 | 243048760 | 174960 | normal term  | Del  | mother        |
| 2   | 242873800 | 243048760 | 174960 | GD           | Del  | father        |
| 2   | 242917734 | 243048760 | 131026 | LGA          | Del  | father        |
| 2   | 242917734 | 243048760 | 131026 | PE           | Del  | father        |
| 2   | 242917734 | 243048760 | 131026 | II_trimester | Del  | mother        |
| 2   | 242919764 | 243048760 | 128996 | GD           | Del  | father        |
| 2   | 242926381 | 243048760 | 122379 | normal term  | Del  | father        |
| 3   | 61495     | 126209    | 64714  | I_trimester  | Dupl | mother        |
| 3   | 857325    | 1063826   | 206501 | GD           | Del  | mother        |
| 3   | 1782524   | 1783885   | 1361   | GD           | Del  | father        |
| 3   | 5391554   | 5438374   | 46820  | normal term  | Del  | mother        |
| 3   | 8829872   | 8857963   | 28091  | SGA          | Dupl | father        |
| 3   | 20577473  | 20583674  | 6201   | normal term  | Dupl | father        |
| 3   | 22283291  | 22285562  | 2271   | normal term  | Del  | mother        |
| 3   | 22283291  | 22285562  | 2271   | SGA          | Del  | mother        |
| 3   | 28810588  | 28816082  | 5494   | GD           | Del  | father        |
| 3   | 35826707  | 35902885  | 76178  | PE           | Dupl | mother        |
| 3   | 37979882  | 37986249  | 6367   | PE           | Del  | father        |
| 3   | 37979882  | 37986249  | 6367   | GD           | Del  | mother        |
| 3   | 37979882  | 37986249  | 6367   | GD           | Del  | father        |

| Chr | Start     | End       | Length | Group        | Type | Mother/father |
|-----|-----------|-----------|--------|--------------|------|---------------|
| 3   | 37979882  | 37986249  | 6367   | II_trimester | Del  | mother        |
| 3   | 37979882  | 37986249  | 6367   | I_trimester  | Del  | mother        |
| 3   | 53033295  | 53035044  | 1749   | normal term  | Del  | father        |
| 3   | 53033295  | 53035044  | 1749   | normal term  | Del  | father        |
| 3   | 53033295  | 53035044  | 1749   | LGA          | Del  | father        |
| 3   | 53033295  | 53035044  | 1749   | LGA          | Del  | mother        |
| 3   | 53033295  | 53035044  | 1749   | PE           | Del  | mother        |
| 3   | 53033295  | 53035044  | 1749   | PE           | Del  | mother        |
| 3   | 62958569  | 62993083  | 34514  | SGA          | Del  | father        |
| 3   | 62958569  | 62993083  | 34514  | LGA          | Del  | father        |
| 3   | 65117947  | 65118762  | 815    | normal term  | Del  | father        |
| 3   | 65191847  | 65214533  | 22686  | normal term  | Del  | mother        |
| 3   | 65191847  | 65215804  | 23957  | normal term  | Del  | father        |
| 3   | 65191847  | 65214533  | 22686  | normal term  | Del  | mother        |
| 3   | 65191847  | 65214533  | 22686  | SGA          | Del  | mother        |
| 3   | 65191847  | 65206583  | 14736  | LGA          | Del  | mother        |
| 3   | 65191847  | 65212596  | 20749  | PE           | Del  | mother        |
| 3   | 65191847  | 65214533  | 22686  | PE           | Del  | father        |
| 3   | 65191847  | 65215804  | 23957  | PE           | Del  | mother        |
| 3   | 65191847  | 65214533  | 22686  | GD           | Del  | mother        |
| 3   | 65191847  | 65214533  | 22686  | GD           | Del  | mother        |
| 3   | 65191847  | 65206583  | 14736  | GD           | Del  | mother        |
| 3   | 65191847  | 65215804  | 23957  | GD           | Del  | mother        |
| 3   | 65191847  | 65214533  | 22686  | II_trimester | Del  | mother        |
| 3   | 65191847  | 65214533  | 22686  | II_trimester | Del  | mother        |
| 3   | 65191847  | 65206583  | 14736  | II_trimester | Del  | mother        |
| 3   | 65191847  | 65214533  | 22686  | I_trimester  | Del  | mother        |
| 3   | 65206583  | 65212596  | 6013   | LGA          | Dupl | father        |
| 3   | 66584922  | 66629765  | 44843  | SGA          | Dupl | father        |
| 3   | 75428675  | 75605157  | 176482 | PE           | Del  | mother        |
| 3   | 75428675  | 75726925  | 298250 | normal term  | Del  | father        |
| 3   | 75428675  | 75469493  | 40818  | normal term  | Del  | mother        |
| 3   | 75428675  | 75726925  | 298250 | PE           | Del  | mother        |
| 3   | 75428675  | 75605157  | 176482 | GD           | Del  | mother        |
| 3   | 75428675  | 75726925  | 298250 | GD           | Del  | father        |
| 3   | 89384566  | 89417171  | 32605  | GD           | Del  | father        |
| 3   | 89384566  | 89417171  | 32605  | I_trimester  | Del  | mother        |
| 3   | 96303888  | 96319964  | 16076  | GD           | Del  | father        |
| 3   | 100351696 | 100437892 | 86196  | PE           | Dupl | father        |
| 3   | 100351696 | 100437892 | 86196  | GD           | Dupl | mother        |
| 3   | 128391789 | 128412024 | 20235  | SGA          | Dupl | mother        |
| 3   | 128391789 | 128412024 | 20235  | SGA          | Dupl | father        |
| 3   | 136149139 | 136260722 | 111583 | I_trimester  | Dupl | mother        |
| 3   | 148964692 | 148967335 | 2643   | PE           | Del  | mother        |
| 3   | 151514590 | 151574286 | 59696  | SGA          | Del  | mother        |
| 3   | 151514590 | 151546041 | 31451  | GD           | Del  | mother        |
| 3   | 151514590 | 151546041 | 31451  | II_trimester | Del  | mother        |

| Chr | Start     | End       | Length | Group        | Type | Mother/father |
|-----|-----------|-----------|--------|--------------|------|---------------|
| 3   | 151676322 | 151681018 | 4696   | II_trimester | Del  | mother        |
| 3   | 162131408 | 162142475 | 11067  | normal term  | Del  | father        |
| 3   | 162131408 | 162142475 | 11067  | SGA          | Del  | father        |
| 3   | 162131408 | 162142475 | 11067  | SGA          | Del  | mother        |
| 3   | 162131408 | 162142475 | 11067  | LGA          | Del  | mother        |
| 3   | 162131408 | 162142475 | 11067  | LGA          | Del  | father        |
| 3   | 162131408 | 162142475 | 11067  | PE           | Del  | mother        |
| 3   | 162131408 | 162142475 | 11067  | PE           | Del  | mother        |
| 3   | 162131408 | 162142475 | 11067  | GD           | Del  | mother        |
| 3   | 162131408 | 162142475 | 11067  | GD           | Del  | father        |
| 3   | 162131408 | 162138826 | 7418   | II_trimester | Del  | mother        |
| 3   | 162132155 | 162142475 | 10320  | SGA          | Dupl | mother        |
| 3   | 162918387 | 163178778 | 260391 | I_trimester  | Del  | mother        |
| 3   | 163178778 | 163263886 | 85108  | normal term  | Dupl | father        |
| 3   | 163661532 | 163664285 | 2753   | SGA          | Del  | mother        |
| 3   | 165041116 | 165073006 | 31890  | LGA          | Del  | father        |
| 3   | 165041116 | 165073006 | 31890  | PE           | Del  | father        |
| 3   | 165041116 | 165073006 | 31890  | PE           | Del  | mother        |
| 3   | 165041116 | 165073006 | 31890  | I_trimester  | Del  | mother        |
| 3   | 173239453 | 173301037 | 61584  | PE           | Dupl | father        |
| 3   | 173239453 | 173309839 | 70386  | LGA          | Dupl | mother        |
| 3   | 175893082 | 175907342 | 14260  | I_trimester  | Del  | mother        |
| 3   | 186386776 | 186411076 | 24300  | normal term  | Del  | mother        |
| 3   | 186411076 | 186494422 | 83346  | normal term  | Dupl | mother        |
| 3   | 192305208 | 192312270 | 7062   | GD           | Del  | father        |
| 3   | 194226486 | 194245931 | 19445  | GD           | Del  | father        |
| 4   | 71566     | 134851    | 63285  | II_trimester | Dupl | mother        |
| 4   | 2764088   | 2770772   | 6684   | I_trimester  | Del  | mother        |
| 4   | 10398427  | 10400156  | 1729   | normal term  | Del  | mother        |
| 4   | 16413099  | 16428830  | 15731  | SGA          | Del  | mother        |
| 4   | 16413099  | 16428830  | 15731  | GD           | Del  | father        |
| 4   | 22934689  | 23563103  | 628414 | GD           | Dupl | mother        |
| 4   | 25033008  | 25505932  | 472924 | GD           | Dupl | mother        |
| 4   | 35149660  | 35151237  | 1577   | SGA          | Del  | mother        |
| 4   | 42697553  | 42708098  | 10545  | II_trimester | Del  | mother        |
| 4   | 42697553  | 42708098  | 10545  | I_trimester  | Del  | mother        |
| 4   | 44976703  | 45002987  | 26284  | I_trimester  | Dupl | mother        |
| 4   | 45817327  | 45863268  | 45941  | PE           | Dupl | father        |
| 4   | 64066404  | 64080016  | 13612  | II_trimester | Del  | mother        |
| 4   | 64138341  | 64150666  | 12325  | SGA          | Del  | mother        |
| 4   | 64138341  | 64150666  | 12325  | GD           | Del  | father        |
| 4   | 64138341  | 64150666  | 12325  | GD           | Del  | mother        |
| 4   | 64138341  | 64150666  | 12325  | II_trimester | Del  | mother        |
| 4   | 66584922  | 66629765  | 44843  | normal term  | Dupl | father        |
| 4   | 80160465  | 80598713  | 438248 | normal term  | Dupl | father        |
| 4   | 80871932  | 80943688  | 71756  | SGA          | Del  | mother        |
| 4   | 86210281  | 86432381  | 222100 | PE           | Dupl | father        |

| Chr | Start     | End       | Length | Group        | Type | Mother/father |
|-----|-----------|-----------|--------|--------------|------|---------------|
| 4   | 93786775  | 93948103  | 161328 | GD           | Del  | father        |
| 4   | 97308914  | 97391366  | 82452  | LGA          | Del  | mother        |
| 4   | 101568956 | 101616281 | 47325  | LGA          | Del  | mother        |
| 4   | 108065738 | 108081536 | 15798  | PE           | Del  | father        |
| 4   | 111079337 | 111187683 | 108346 | SGA          | Dupl | mother        |
| 4   | 121393821 | 121457685 | 63864  | GD           | Del  | mother        |
| 4   | 122285263 | 122289863 | 4600   | GD           | Del  | father        |
| 4   | 122324112 | 122333765 | 9653   | normal term  | Del  | mother        |
| 4   | 129774375 | 129927804 | 153429 | SGA          | Dupl | mother        |
| 4   | 138103313 | 138190394 | 87081  | II_trimester | Del  | mother        |
| 4   | 154581208 | 154585922 | 4714   | GD           | Del  | mother        |
| 4   | 158430547 | 158479507 | 48960  | normal term  | Del  | father        |
| 4   | 161062144 | 161071059 | 8915   | SGA          | Del  | father        |
| 4   | 161062144 | 161071059 | 8915   | GD           | Del  | mother        |
| 4   | 161062144 | 161071059 | 8915   | GD           | Del  | mother        |
| 4   | 161590091 | 161646978 | 56887  | GD           | Dupl | father        |
| 4   | 161945302 | 162009525 | 64223  | LGA          | Dupl | father        |
| 4   | 161952228 | 162009525 | 57297  | normal term  | Dupl | father        |
| 4   | 161952228 | 162003624 | 51396  | SGA          | Dupl | mother        |
| 4   | 161952228 | 162003624 | 51396  | LGA          | Dupl | mother        |
| 4   | 161952228 | 162003624 | 51396  | GD           | Dupl | mother        |
| 4   | 161952228 | 162003624 | 51396  | GD           | Dupl | father        |
| 4   | 161952228 | 162003624 | 51396  | I_trimester  | Dupl | mother        |
| 4   | 165576740 | 165587000 | 10260  | PE           | Del  | father        |
| 4   | 165576740 | 165587000 | 10260  | GD           | Del  | father        |
| 4   | 186400228 | 186414626 | 14398  | GD           | Del  | father        |
| 4   | 189133207 | 189158163 | 24956  | GD           | Del  | mother        |
| 4   | 190438606 | 190915650 | 477044 | GD           | Dupl | father        |
| 5   | 788646    | 851046    | 62400  | SGA          | Del  | father        |
| 5   | 788646    | 840717    | 52071  | PE           | Del  | father        |
| 5   | 788646    | 821726    | 33080  | PE           | Del  | mother        |
| 5   | 788646    | 825338    | 36692  | GD           | Del  | mother        |
| 5   | 7169851   | 7191074   | 21223  | normal term  | Del  | father        |
| 5   | 7169851   | 7191074   | 21223  | SGA          | Del  | mother        |
| 5   | 7178644   | 7191074   | 12430  | PE           | Del  | mother        |
| 5   | 7179551   | 7191074   | 11523  | LGA          | Del  | father        |
| 5   | 8708019   | 8744557   | 36538  | normal term  | Del  | mother        |
| 5   | 8708019   | 8744557   | 36538  | LGA          | Del  | mother        |
| 5   | 8708019   | 8744557   | 36538  | PE           | Del  | mother        |
| 5   | 8708019   | 8744557   | 36538  | GD           | Del  | mother        |
| 5   | 8708019   | 8744557   | 36538  | I_trimester  | Del  | mother        |
| 5   | 8715360   | 8744557   | 29197  | PE           | Del  | father        |
| 5   | 8715360   | 8744557   | 29197  | I_trimester  | Del  | mother        |
| 5   | 8728874   | 8744557   | 15683  | LGA          | Del  | father        |
| 5   | 9902403   | 9924597   | 22194  | SGA          | Del  | mother        |
| 5   | 9902403   | 9924597   | 22194  | PE           | Del  | mother        |
| 5   | 9902403   | 9924597   | 22194  | GD           | Del  | mother        |

| Chr | Start     | End       | Length | Group        | Type | Mother/father |
|-----|-----------|-----------|--------|--------------|------|---------------|
| 5   | 18819946  | 18913137  | 93191  | normal term  | Dupl | mother        |
| 5   | 32101400  | 32159517  | 58117  | normal term  | Dupl | mother        |
| 5   | 32101400  | 32159517  | 58117  | GD           | Dupl | mother        |
| 5   | 32107381  | 32159517  | 52136  | normal term  | Dupl | mother        |
| 5   | 32107381  | 32159517  | 52136  | GD           | Dupl | father        |
| 5   | 32107381  | 32159517  | 52136  | I_trimester  | Dupl | mother        |
| 5   | 68757774  | 68828296  | 70522  | GD           | Dupl | mother        |
| 5   | 70305696  | 70307464  | 1768   | normal term  | Del  | father        |
| 5   | 70305696  | 70307464  | 1768   | LGA          | Del  | mother        |
| 5   | 70305696  | 70307464  | 1768   | GD           | Del  | father        |
| 5   | 70305696  | 70307464  | 1768   | GD           | Del  | father        |
| 5   | 70305696  | 70307464  | 1768   | I_trimester  | Del  | mother        |
| 5   | 94264817  | 94316007  | 51190  | GD           | Dupl | mother        |
| 5   | 97047653  | 97099320  | 51667  | normal term  | Del  | father        |
| 5   | 97048466  | 97108559  | 60093  | normal term  | Del  | mother        |
| 5   | 97048466  | 97108559  | 60093  | SGA          | Del  | mother        |
| 5   | 97048466  | 97099320  | 50854  | LGA          | Del  | father        |
| 5   | 97048466  | 97108559  | 60093  | LGA          | Del  | mother        |
| 5   | 97048466  | 97108559  | 60093  | LGA          | Del  | mother        |
| 5   | 97048466  | 97108559  | 60093  | LGA          | Del  | mother        |
| 5   | 97048466  | 97108559  | 60093  | GD           | Del  | mother        |
| 5   | 97048466  | 97111523  | 63057  | II_trimester | Del  | mother        |
| 5   | 97048466  | 97108559  | 60093  | II_trimester | Del  | mother        |
| 5   | 97048466  | 97108559  | 60093  | I_trimester  | Del  | mother        |
| 5   | 97933888  | 97939616  | 5728   | I_trimester  | Del  | mother        |
| 5   | 98779530  | 98841255  | 61725  | LGA          | Del  | father        |
| 5   | 99597529  | 99614601  | 17072  | LGA          | Del  | mother        |
| 5   | 104069562 | 104406952 | 337390 | LGA          | Del  | father        |
| 5   | 106223536 | 106260687 | 37151  | SGA          | Del  | father        |
| 5   | 109363175 | 109384306 | 21131  | SGA          | Del  | father        |
| 5   | 109363175 | 109375480 | 12305  | SGA          | Del  | mother        |
| 5   | 113160490 | 113171928 | 11438  | LGA          | Del  | father        |
| 5   | 113874136 | 113986223 | 112087 | PE           | Del  | mother        |
| 5   | 117701468 | 117707373 | 5905   | I_trimester  | Del  | mother        |
| 5   | 155477866 | 155484237 | 6371   | SGA          | Del  | mother        |
| 5   | 155477866 | 155484237 | 6371   | LGA          | Del  | mother        |
| 5   | 155477866 | 155484237 | 6371   | LGA          | Del  | mother        |
| 5   | 177391049 | 177400550 | 9501   | LGA          | Del  | mother        |
| 6   | 14839778  | 14845799  | 6021   | PE           | Del  | mother        |
| 6   | 19045560  | 19048773  | 3213   | normal term  | Del  | mother        |
| 6   | 19045560  | 19048773  | 3213   | PE           | Del  | mother        |
| 6   | 27632581  | 27660508  | 27927  | LGA          | Dupl | father        |
| 6   | 29094696  | 29161435  | 66739  | LGA          | Del  | mother        |
| 6   | 29869110  | 29896421  | 27311  | SGA          | Del  | father        |
| 6   | 31221039  | 31228972  | 7933   | GD           | Del  | father        |
| 6   | 31338528  | 31341357  | 2829   | II_trimester | Del  | mother        |
| 6   | 31355119  | 31453640  | 98521  | PE           | Dupl | father        |
| 6   | 32498834  | 32519005  | 20171  | SGA          | Del  | mother        |

| Chr | Start     | End       | Length | Group        | Type | Mother/father |
|-----|-----------|-----------|--------|--------------|------|---------------|
| 6   | 48329809  | 48352572  | 22763  | II_trimester | Del  | mother        |
| 6   | 55776585  | 56253790  | 477205 | normal term  | Del  | father        |
| 6   | 55819362  | 55846527  | 27165  | I_trimester  | Del  | mother        |
| 6   | 55828727  | 55846527  | 17800  | normal term  | Del  | father        |
| 6   | 65828853  | 65910220  | 81367  | normal term  | Del  | father        |
| 6   | 66554082  | 66622346  | 68264  | I_trimester  | Dupl | mother        |
| 6   | 66593133  | 66622346  | 29213  | I_trimester  | Dupl | mother        |
| 6   | 67017494  | 67044431  | 14341  | normal term  | Del  | mother        |
| 6   | 67017494  | 67047294  | 29800  | normal term  | Del  | mother        |
| 6   | 67017494  | 67039740  | 22246  | PE           | Del  | father        |
| 6   | 67017494  | 67047294  | 29800  | PE           | Del  | mother        |
| 6   | 67017494  | 67047294  | 29800  | GD           | Del  | father        |
| 6   | 67017494  | 67047294  | 29800  | GD           | Del  | mother        |
| 6   | 84553478  | 84698353  | 144875 | normal term  | Dupl | father        |
| 6   | 84553478  | 84698353  | 144875 | LGA          | Dupl | father        |
| 6   | 110396540 | 110411065 | 14525  | LGA          | Del  | father        |
| 6   | 112955668 | 112968423 | 12755  | SGA          | Dupl | father        |
| 6   | 124404539 | 124474595 | 70056  | normal term  | Dupl | mother        |
| 6   | 124416847 | 124474595 | 57748  | SGA          | Dupl | father        |
| 6   | 129093272 | 129125184 | 31912  | I_trimester  | Dupl | mother        |
| 6   | 138909908 | 138929434 | 19526  | PE           | Del  | mother        |
| 6   | 147670086 | 147723577 | 53491  | SGA          | Dupl | father        |
| 6   | 147685480 | 147723577 | 38097  | I_trimester  | Dupl | mother        |
| 6   | 151618235 | 151621611 | 3376   | PE           | Del  | mother        |
| 6   | 154323909 | 154341558 | 17649  | GD           | Del  | mother        |
| 6   | 161352698 | 161566909 | 214211 | II_trimester | Dupl | mother        |
| 7   | 44935     | 63494     | 18559  | GD           | Dupl | mother        |
| 7   | 3609712   | 3627799   | 18087  | I_trimester  | Del  | mother        |
| 7   | 9128070   | 9229882   | 101812 | normal term  | Del  | mother        |
| 7   | 9636392   | 9847642   | 211250 | GD           | Del  | mother        |
| 7   | 9722307   | 9805492   | 83185  | normal term  | Dupl | father        |
| 7   | 10819155  | 10945193  | 126038 | GD           | Del  | father        |
| 7   | 12418602  | 12422721  | 4119   | PE           | Del  | father        |
| 7   | 17425895  | 17453479  | 27584  | normal term  | Del  | mother        |
| 7   | 17425895  | 17453479  | 27584  | GD           | Del  | mother        |
| 7   | 19206436  | 19211709  | 5273   | PE           | Del  | mother        |
| 7   | 19206436  | 19211709  | 5273   | GD           | Del  | mother        |
| 7   | 21940960  | 22011292  | 70332  | normal term  | Dupl | father        |
| 7   | 33166070  | 33185898  | 19828  | GD           | Dupl | mother        |
| 7   | 43930775  | 43935301  | 4526   | I_trimester  | Del  | mother        |
| 7   | 52129322  | 52131514  | 2192   | PE           | Dupl | father        |
| 7   | 52733291  | 52743803  | 10512  | normal term  | Dupl | mother        |
| 7   | 52733291  | 52743803  | 10512  | LGA          | Dupl | mother        |
| 7   | 52733291  | 52743803  | 10512  | PE           | Dupl | mother        |
| 7   | 52733291  | 52743803  | 10512  | GD           | Dupl | father        |
| 7   | 53198269  | 53206225  | 7956   | SGA          | Del  | mother        |
| 7   | 57481104  | 57621951  | 140847 | PE           | Dupl | mother        |



| Chr | Start     | End       | Length  | Group       | Type | Mother/father |
|-----|-----------|-----------|---------|-------------|------|---------------|
| 7   | 61747794  | 62358419  | 610625  | SGA         | Dupl | mother        |
| 7   | 61747794  | 62838532  | 1090738 | PE          | Dupl | father        |
| 7   | 61994170  | 62729224  | 735054  | PE          | Dupl | mother        |
| 7   | 62035570  | 62047108  | 11538   | I_trimester | Del  | mother        |
| 7   | 76134203  | 76144560  | 10357   | LGA         | Dupl | father        |
| 7   | 76143705  | 76637441  | 493736  | normal term | Dupl | father        |
| 7   | 76474914  | 76637441  | 162527  | I_trimester | Dupl | mother        |
| 7   | 88588037  | 88596054  | 8017    | normal term | Del  | father        |
| 7   | 92055272  | 92069164  | 13892   | GD          | Del  | mother        |
| 7   | 97933601  | 98157619  | 224018  | I_trimester | Dupl | mother        |
| 7   | 108058574 | 108066326 | 7752    | normal term | Del  | father        |
| 7   | 109455705 | 109477177 | 21472   | normal term | Dupl | father        |
| 7   | 109455705 | 109477177 | 21472   | SGA         | Dupl | father        |
| 7   | 111025948 | 111073710 | 47762   | PE          | Del  | mother        |
| 7   | 111069946 | 111166165 | 96219   | I_trimester | Dupl | mother        |
| 7   | 111251449 | 111288373 | 36924   | PE          | Del  | mother        |
| 7   | 111433419 | 111630024 | 196605  | I_trimester | Del  | mother        |
| 7   | 141774290 | 141793419 | 19129   | normal term | Del  | father        |
| 7   | 141774290 | 141793419 | 19129   | normal term | Del  | father        |
| 7   | 141774290 | 141793419 | 19129   | SGA         | Del  | father        |
| 7   | 141774290 | 141793419 | 19129   | PE          | Del  | mother        |
| 7   | 141774290 | 141782731 | 8441    | GD          | Del  | father        |
| 7   | 141774290 | 141793419 | 19129   | GD          | Del  | father        |
| 7   | 141774290 | 141793419 | 19129   | GD          | Del  | mother        |
| 7   | 142137119 | 142152369 | 15250   | GD          | Del  | mother        |
| 7   | 145794079 | 145796758 | 2679    | PE          | Del  | father        |
| 7   | 147117454 | 147145576 | 28122   | SGA         | Dupl | father        |
| 7   | 150553475 | 150560322 | 6847    | normal term | Del  | mother        |
| 7   | 151590285 | 151599503 | 9218    | LGA         | Del  | father        |
| 7   | 151873853 | 152277531 | 403678  | LGA         | Dupl | father        |
| 7   | 158845384 | 159119486 | 274102  | normal term | Dupl | mother        |
| 8   | 2142267   | 2158537   | 16270   | I_trimester | Del  | mother        |
| 8   | 3786543   | 3789272   | 2729    | LGA         | Del  | father        |
| 8   | 5563282   | 5587923   | 24641   | PE          | Del  | mother        |
| 8   | 5599399   | 5605087   | 5688    | SGA         | Del  | father        |
| 8   | 5599399   | 5605087   | 5688    | SGA         | Del  | mother        |
| 8   | 5599399   | 5605087   | 5688    | LGA         | Del  | father        |
| 8   | 5599399   | 5608082   | 8683    | PE          | Del  | mother        |
| 8   | 5599399   | 5607663   | 8264    | PE          | Del  | father        |
| 8   | 5599399   | 5605087   | 5688    | GD          | Del  | mother        |
| 8   | 5599399   | 5607797   | 8398    | GD          | Del  | father        |
| 8   | 5599399   | 5605087   | 5688    | GD          | Del  | father        |
| 8   | 5599399   | 5605087   | 5688    | GD          | Del  | mother        |
| 8   | 5599399   | 5605087   | 5688    | GD          | Del  | father        |
| 8   | 5599399   | 5605087   | 5688    | I_trimester | Del  | mother        |
| 8   | 5599399   | 5605087   | 5688    | I_trimester | Del  | mother        |
| 8   | 5601191   | 5605087   | 3896    | normal term | Del  | father        |

| Chr | Start     | End       | Length | Group        | Type | Mother/father |
|-----|-----------|-----------|--------|--------------|------|---------------|
| 8   | 5601191   | 5605087   | 3896   | GD           | Del  | father        |
| 8   | 8583109   | 8587589   | 4480   | PE           | Del  | father        |
| 8   | 8583109   | 8587589   | 4480   | GD           | Del  | mother        |
| 8   | 13380879  | 13536002  | 155123 | GD           | Dupl | father        |
| 8   | 15395144  | 15410250  | 15106  | I_trimester  | Del  | mother        |
| 8   | 15899688  | 15939182  | 39494  | PE           | Dupl | mother        |
| 8   | 15948235  | 16025964  | 77729  | normal term  | Del  | father        |
| 8   | 15948235  | 16025964  | 77729  | LGA          | Del  | father        |
| 8   | 16262509  | 16268502  | 5993   | normal term  | Del  | father        |
| 8   | 16262509  | 16268502  | 5993   | PE           | Del  | mother        |
| 8   | 17580791  | 17581454  | 663    | normal term  | Del  | father        |
| 8   | 17580791  | 17582137  | 1346   | normal term  | Del  | mother        |
| 8   | 17580791  | 17581700  | 909    | normal term  | Del  | mother        |
| 8   | 17580791  | 17582137  | 1346   | SGA          | Del  | mother        |
| 8   | 17580791  | 17581454  | 663    | LGA          | Del  | mother        |
| 8   | 17580791  | 17582137  | 1346   | PE           | Del  | father        |
| 8   | 17580791  | 17581700  | 909    | GD           | Del  | father        |
| 8   | 17580791  | 17582137  | 1346   | II_trimester | Del  | mother        |
| 8   | 20952060  | 21151009  | 198949 | PE           | Del  | father        |
| 8   | 24604793  | 25028671  | 423878 | GD           | Dupl | father        |
| 8   | 40184872  | 40189549  | 4677   | SGA          | Del  | father        |
| 8   | 40184872  | 40189549  | 4677   | GD           | Del  | father        |
| 8   | 51227228  | 51230812  | 3584   | GD           | Del  | father        |
| 8   | 83271395  | 83293872  | 22477  | SGA          | Del  | mother        |
| 8   | 83271395  | 83293872  | 22477  | PE           | Del  | mother        |
| 8   | 84876695  | 84890104  | 13409  | GD           | Dupl | mother        |
| 8   | 86923375  | 86990451  | 67076  | GD           | Del  | father        |
| 8   | 90215649  | 90259170  | 43521  | LGA          | Del  | father        |
| 8   | 92128840  | 92181214  | 52374  | normal term  | Del  | mother        |
| 8   | 92128840  | 92198211  | 69371  | normal term  | Del  | mother        |
| 8   | 92128840  | 92183658  | 54818  | SGA          | Del  | mother        |
| 8   | 92275768  | 92295114  | 19346  | SGA          | Del  | mother        |
| 8   | 92275768  | 92295114  | 19346  | SGA          | Del  | mother        |
| 8   | 96959819  | 96969356  | 9537   | LGA          | Del  | father        |
| 8   | 137679805 | 137857327 | 177522 | GD           | Del  | father        |
| 8   | 137688230 | 137857327 | 169097 | normal term  | Del  | mother        |
| 9   | 46587     | 274108    | 227521 | II_trimester | Dupl | mother        |
| 9   | 354334    | 355793    | 1459   | normal term  | Del  | mother        |
| 9   | 395250    | 707463    | 312213 | II_trimester | Dupl | mother        |
| 9   | 1447011   | 1450428   | 3417   | LGA          | Del  | mother        |
| 9   | 3628376   | 3747376   | 119000 | LGA          | Del  | mother        |
| 9   | 5306824   | 5335470   | 28646  | GD           | Del  | father        |
| 9   | 8582229   | 8610513   | 28284  | LGA          | Dupl | father        |
| 9   | 11414180  | 11463799  | 49619  | PE           | Del  | father        |
| 9   | 12046842  | 12163583  | 116741 | GD           | Del  | father        |
| 9   | 24502737  | 24515111  | 12374  | normal term  | Del  | father        |
| 9   | 24502737  | 24515111  | 12374  | SGA          | Del  | mother        |

| Chr | Start     | End       | Length  | Group        | Type | Mother/father |
|-----|-----------|-----------|---------|--------------|------|---------------|
| 9   | 24502737  | 24515111  | 12374   | PE           | Del  | father        |
| 9   | 24754015  | 24785247  | 31232   | SGA          | Del  | father        |
| 9   | 28309788  | 28342179  | 32391   | GD           | Del  | mother        |
| 9   | 29919239  | 29928182  | 8943    | GD           | Dupl | father        |
| 9   | 30181745  | 30222006  | 40261   | SGA          | Dupl | father        |
| 9   | 72100118  | 72115711  | 15593   | SGA          | Del  | mother        |
| 9   | 73907625  | 73909871  | 2246    | normal term  | Dupl | father        |
| 9   | 73907625  | 73909871  | 2246    | normal term  | Dupl | mother        |
| 9   | 86203246  | 86206343  | 3097    | SGA          | Del  | mother        |
| 9   | 86203246  | 86206343  | 3097    | LGA          | Del  | father        |
| 9   | 86203246  | 86206343  | 3097    | LGA          | Del  | father        |
| 9   | 86203246  | 86206343  | 3097    | PE           | Del  | father        |
| 9   | 86203246  | 86206343  | 3097    | PE           | Del  | mother        |
| 9   | 86203246  | 86206343  | 3097    | PE           | Del  | father        |
| 9   | 86203246  | 86206343  | 3097    | II_trimester | Del  | mother        |
| 9   | 94396059  | 94398847  | 2788    | II_trimester | Del  | mother        |
| 9   | 115938318 | 116029174 | 90856   | normal term  | Dupl | father        |
| 10  | 13056587  | 13060410  | 3823    | SGA          | Del  | mother        |
| 10  | 13056587  | 13060410  | 3823    | SGA          | Del  | father        |
| 10  | 13056587  | 13058458  | 1871    | II_trimester | Del  | mother        |
| 10  | 20842031  | 20857365  | 15334   | LGA          | Del  | mother        |
| 10  | 20842031  | 20857365  | 15334   | GD           | Del  | mother        |
| 10  | 36909064  | 36949132  | 40068   | LGA          | Dupl | father        |
| 10  | 42682133  | 42827951  | 145818  | PE           | Del  | father        |
| 10  | 45209441  | 45359483  | 150042  | SGA          | Dupl | mother        |
| 10  | 46283686  | 47703869  | 1420183 | GD           | Dupl | mother        |
| 10  | 47049547  | 47940417  | 890870  | PE           | Dupl | mother        |
| 10  | 47049547  | 47940417  | 890870  | II_trimester | Dupl | mother        |
| 10  | 47543322  | 47940417  | 397095  | PE           | Dupl | mother        |
| 10  | 47543322  | 47940417  | 397095  | LGA          | Dupl | mother        |
| 10  | 47543322  | 47703869  | 160547  | II_trimester | Dupl | mother        |
| 10  | 47543322  | 47703869  | 160547  | I_trimester  | Dupl | mother        |
| 10  | 53207634  | 53211449  | 3815    | GD           | Del  | father        |
| 10  | 55735463  | 55779915  | 44452   | SGA          | Del  | mother        |
| 10  | 57401749  | 57460416  | 58667   | PE           | Del  | mother        |
| 10  | 58768319  | 58916759  | 148440  | GD           | Del  | father        |
| 10  | 68078481  | 68114481  | 36000   | SGA          | Del  | mother        |
| 10  | 68078481  | 68114481  | 36000   | LGA          | Del  | mother        |
| 10  | 68078481  | 68114481  | 36000   | LGA          | Del  | father        |
| 10  | 68078481  | 68113595  | 35114   | GD           | Del  | father        |
| 10  | 68078481  | 68114481  | 36000   | II_trimester | Del  | mother        |
| 10  | 68078481  | 68114481  | 36000   | I_trimester  | Del  | mother        |
| 10  | 78457588  | 78459211  | 1623    | II_trimester | Del  | mother        |
| 10  | 82879719  | 82890180  | 10461   | LGA          | Del  | father        |
| 10  | 82879719  | 82890180  | 10461   | GD           | Del  | father        |
| 10  | 82879719  | 82890180  | 10461   | II_trimester | Del  | mother        |
| 10  | 82879719  | 82890180  | 10461   | II_trimester | Del  | mother        |

| Chr | Start     | End       | Length | Group        | Type | Mother/father |
|-----|-----------|-----------|--------|--------------|------|---------------|
| 10  | 82879719  | 82892288  | 12569  | II_trimester | Del  | mother        |
| 10  | 83468658  | 83485025  | 16367  | I_trimester  | Del  | mother        |
| 10  | 83944705  | 83959179  | 14474  | SGA          | Del  | father        |
| 10  | 83944705  | 83959179  | 14474  | PE           | Del  | mother        |
| 10  | 87954602  | 87959049  | 4447   | GD           | Del  | mother        |
| 10  | 96499710  | 96563757  | 64047  | I_trimester  | Del  | mother        |
| 10  | 107618048 | 107681447 | 63399  | SGA          | Del  | mother        |
| 10  | 107984320 | 108015496 | 31176  | normal term  | Del  | mother        |
| 10  | 107984320 | 108015496 | 31176  | LGA          | Del  | father        |
| 10  | 114846649 | 114847723 | 1074   | normal term  | Del  | mother        |
| 10  | 122079594 | 122094271 | 14677  | II_trimester | Del  | mother        |
| 10  | 134589631 | 134669463 | 79832  | normal term  | Dupl | father        |
| 10  | 135217175 | 135369532 | 152357 | normal term  | Dupl | mother        |
| 10  | 135252347 | 135378802 | 126455 | PE           | Dupl | mother        |
| 10  | 135252347 | 135378802 | 126455 | II_trimester | Dupl | mother        |
| 10  | 135252347 | 135378802 | 126455 | I_trimester  | Dupl | mother        |
| 11  | 264391    | 396308    | 131917 | SGA          | Dupl | mother        |
| 11  | 394005    | 419906    | 25901  | SGA          | Dupl | mother        |
| 11  | 8959020   | 8964938   | 5918   | PE           | Del  | father        |
| 11  | 18135642  | 18138153  | 2511   | normal term  | Del  | mother        |
| 11  | 18949220  | 18956690  | 7470   | GD           | Del  | father        |
| 11  | 25712300  | 25720706  | 8406   | LGA          | Del  | father        |
| 11  | 25712300  | 25720706  | 8406   | I_trimester  | Del  | mother        |
| 11  | 34458230  | 34460711  | 2481   | GD           | Dupl | father        |
| 11  | 34458230  | 34460704  | 2474   | GD           | Dupl | father        |
| 11  | 37768477  | 37891672  | 123195 | I_trimester  | Dupl | mother        |
| 11  | 42151229  | 42185849  | 34620  | PE           | Dupl | mother        |
| 11  | 49977336  | 50668400  | 691064 | PE           | Dupl | mother        |
| 11  | 59204920  | 59244608  | 39688  | PE           | Del  | father        |
| 11  | 67373669  | 67588012  | 214343 | I_trimester  | Dupl | mother        |
| 11  | 73638858  | 73708521  | 69663  | PE           | Dupl | father        |
| 11  | 81498152  | 81517261  | 19109  | GD           | Del  | mother        |
| 11  | 81503992  | 81517261  | 13269  | SGA          | Del  | father        |
| 11  | 81503992  | 81526573  | 22581  | SGA          | Del  | mother        |
| 11  | 81503992  | 81517261  | 13269  | LGA          | Del  | mother        |
| 11  | 81503992  | 81517261  | 13269  | LGA          | Del  | mother        |
| 11  | 81503992  | 81517261  | 13269  | LGA          | Del  | father        |
| 11  | 81503992  | 81517261  | 13269  | PE           | Del  | mother        |
| 11  | 81503992  | 81517261  | 13269  | GD           | Del  | mother        |
| 11  | 81505463  | 81517261  | 11798  | GD           | Del  | mother        |
| 11  | 81505463  | 81517261  | 11798  | II_trimester | Del  | mother        |
| 11  | 82858667  | 82876270  | 17603  | normal term  | Dupl | father        |
| 11  | 82865518  | 82876270  | 10752  | PE           | Dupl | father        |
| 11  | 88372708  | 88380551  | 7843   | normal term  | Del  | mother        |
| 11  | 96192004  | 96243894  | 51890  | normal term  | Dupl | father        |
| 11  | 97852498  | 98523074  | 670576 | PE           | Del  | father        |
| 11  | 99377407  | 99574689  | 197282 | SGA          | Dupl | father        |

| Chr | Start     | End       | Length | Group        | Type | Mother/father |
|-----|-----------|-----------|--------|--------------|------|---------------|
| 11  | 99525126  | 99566782  | 41656  | GD           | Del  | mother        |
| 11  | 104366089 | 104372318 | 6229   | SGA          | Del  | mother        |
| 11  | 104754500 | 104761271 | 6771   | LGA          | Del  | mother        |
| 11  | 107653081 | 107683596 | 30515  | GD           | Dupl | father        |
| 11  | 107659024 | 107670228 | 11204  | GD           | Dupl | father        |
| 11  | 109111782 | 109156782 | 45000  | GD           | Del  | father        |
| 11  | 120557343 | 120630452 | 73109  | SGA          | Del  | mother        |
| 11  | 120557343 | 120630452 | 73109  | GD           | Del  | mother        |
| 11  | 122686128 | 122749214 | 63086  | GD           | Del  | mother        |
| 11  | 134347974 | 134720173 | 372199 | LGA          | Dupl | father        |
| 12  | 2245636   | 2252924   | 7288   | normal term  | Del  | mother        |
| 12  | 2245636   | 2252924   | 7288   | LGA          | Del  | mother        |
| 12  | 2245636   | 2252924   | 7288   | PE           | Del  | father        |
| 12  | 2245636   | 2252924   | 7288   | GD           | Del  | father        |
| 12  | 2245636   | 2252924   | 7288   | II_trimester | Del  | mother        |
| 12  | 2245636   | 2252924   | 7288   | II_trimester | Del  | mother        |
| 12  | 2245636   | 2252924   | 7288   | I_trimester  | Del  | mother        |
| 12  | 2245636   | 2252924   | 7288   | I_trimester  | Del  | mother        |
| 12  | 7930171   | 8146162   | 215991 | LGA          | Dupl | mother        |
| 12  | 7930171   | 8102386   | 172215 | PE           | Dupl | father        |
| 12  | 7993316   | 8125745   | 132429 | I_trimester  | Dupl | mother        |
| 12  | 8000912   | 8114429   | 113517 | LGA          | Dupl | father        |
| 12  | 8003758   | 8123306   | 119548 | II_trimester | Del  | mother        |
| 12  | 16002622  | 16018886  | 16264  | SGA          | Del  | mother        |
| 12  | 16295061  | 16480949  | 185888 | GD           | Del  | mother        |
| 12  | 21293334  | 21298702  | 5368   | GD           | Dupl | father        |
| 12  | 25648676  | 25654445  | 5769   | PE           | Del  | mother        |
| 12  | 31259372  | 31415204  | 155832 | normal term  | Dupl | father        |
| 12  | 31259372  | 31406907  | 147535 | SGA          | Dupl | father        |
| 12  | 31259372  | 31409778  | 150406 | LGA          | Dupl | father        |
| 12  | 31259372  | 31409579  | 150207 | PE           | Dupl | mother        |
| 12  | 31259372  | 31409778  | 150406 | GD           | Dupl | mother        |
| 12  | 31266287  | 31408696  | 142409 | PE           | Dupl | mother        |
| 12  | 31266287  | 31406907  | 140620 | SGA          | Dupl | father        |
| 12  | 52845952  | 52859985  | 14033  | SGA          | Del  | mother        |
| 12  | 52845952  | 52862614  | 16662  | I_trimester  | Del  | mother        |
| 12  | 62269717  | 62272569  | 2852   | normal term  | Del  | mother        |
| 12  | 63942649  | 64118558  | 175909 | PE           | Dupl | mother        |
| 12  | 70679864  | 70681814  | 1950   | normal term  | Del  | father        |
| 12  | 70680393  | 70681814  | 1421   | II_trimester | Del  | mother        |
| 12  | 70680393  | 70681814  | 1421   | I_trimester  | Del  | mother        |
| 12  | 80155600  | 80160230  | 4630   | GD           | Dupl | father        |
| 12  | 83171936  | 83206342  | 34406  | SGA          | Del  | mother        |
| 12  | 100002686 | 100008773 | 6087   | II_trimester | Del  | mother        |
| 12  | 109552849 | 109712475 | 159626 | normal term  | Dupl | father        |
| 12  | 125260645 | 125321461 | 60816  | PE           | Dupl | father        |
| 12  | 129226773 | 129266496 | 39723  | SGA          | Dupl | mother        |

| Chr | Start     | End       | Length  | Group        | Type | Mother/father |
|-----|-----------|-----------|---------|--------------|------|---------------|
| 12  | 129228874 | 129234104 | 5230    | PE           | Del  | mother        |
| 12  | 129228874 | 129234104 | 5230    | I_trimester  | Del  | mother        |
| 12  | 131730735 | 131825125 | 94390   | GD           | Del  | father        |
| 13  | 20470071  | 20509959  | 39888   | LGA          | Dupl | mother        |
| 13  | 23357136  | 23515553  | 158417  | LGA          | Dupl | father        |
| 13  | 23546238  | 23553518  | 7280    | normal term  | Del  | father        |
| 13  | 27015106  | 27017442  | 2336    | I_trimester  | Del  | mother        |
| 13  | 45634138  | 45910139  | 276001  | GD           | Dupl | father        |
| 13  | 58593657  | 58599031  | 5374    | PE           | Del  | father        |
| 13  | 58593657  | 58599031  | 5374    | II_trimester | Del  | mother        |
| 13  | 64343819  | 64387507  | 43688   | GD           | Dupl | mother        |
| 13  | 69240121  | 69267981  | 27860   | SGA          | Del  | mother        |
| 13  | 69240121  | 69267981  | 27860   | PE           | Del  | mother        |
| 13  | 69247022  | 69267981  | 20959   | normal term  | Del  | mother        |
| 13  | 69247022  | 69267981  | 20959   | SGA          | Del  | mother        |
| 13  | 69247022  | 69276739  | 29717   | LGA          | Del  | father        |
| 13  | 69247022  | 69267981  | 20959   | PE           | Del  | mother        |
| 13  | 69247022  | 69267981  | 20959   | GD           | Del  | mother        |
| 13  | 69247022  | 69267981  | 20959   | II_trimester | Del  | mother        |
| 13  | 69247022  | 69267981  | 20959   | II_trimester | Del  | mother        |
| 13  | 69247022  | 69267981  | 20959   | I_trimester  | Del  | mother        |
| 13  | 70565868  | 70578513  | 12645   | I_trimester  | Del  | mother        |
| 13  | 70744882  | 70778217  | 33335   | I_trimester  | Del  | mother        |
| 13  | 80691352  | 80696432  | 5080    | PE           | Dupl | father        |
| 13  | 81919202  | 81952150  | 32948   | LGA          | Dupl | father        |
| 13  | 83788742  | 83791615  | 2873    | PE           | Del  | father        |
| 13  | 83788742  | 83793975  | 5233    | GD           | Del  | father        |
| 13  | 84103707  | 84157927  | 54220   | GD           | Del  | father        |
| 13  | 84103707  | 84157927  | 54220   | GD           | Del  | mother        |
| 13  | 84103707  | 84157927  | 54220   | I_trimester  | Del  | mother        |
| 13  | 84103707  | 84157927  | 54220   | I_trimester  | Del  | mother        |
| 13  | 85868323  | 85904426  | 36103   | PE           | Dupl | mother        |
| 13  | 89770384  | 89840239  | 69855   | SGA          | Del  | mother        |
| 13  | 90387429  | 90490883  | 103454  | II_trimester | Dupl | mother        |
| 13  | 95933660  | 96035883  | 102223  | LGA          | Dupl | mother        |
| 13  | 95933660  | 95983387  | 49727   | GD           | Dupl | mother        |
| 13  | 95999739  | 96035883  | 36144   | GD           | Dupl | mother        |
| 13  | 103689469 | 103699213 | 9744    | LGA          | Dupl | mother        |
| 13  | 106326623 | 106866163 | 539540  | II_trimester | Dupl | mother        |
| 14  | 19327823  | 20426742  | 1098919 | LGA          | Dupl | father        |
| 14  | 19327823  | 20626291  | 1298468 | I_trimester  | Dupl | mother        |
| 14  | 21371774  | 21393289  | 21515   | LGA          | Del  | mother        |
| 14  | 22376027  | 22737977  | 361950  | normal term  | Del  | father        |
| 14  | 22719680  | 22795126  | 75446   | LGA          | Del  | father        |
| 14  | 24453366  | 24484060  | 30694   | SGA          | Del  | mother        |
| 14  | 24453366  | 24484060  | 30694   | SGA          | Del  | father        |
| 14  | 24453366  | 24484060  | 30694   | LGA          | Del  | mother        |

| Chr | Start     | End       | Length  | Group        | Type | Mother/father |
|-----|-----------|-----------|---------|--------------|------|---------------|
| 14  | 24453366  | 24484060  | 30694   | LGA          | Del  | father        |
| 14  | 35110512  | 35160860  | 50348   | LGA          | Del  | father        |
| 14  | 40855032  | 40858428  | 3396    | PE           | Del  | father        |
| 14  | 41853509  | 41884448  | 30939   | normal term  | Del  | father        |
| 14  | 46749460  | 46759568  | 10108   | LGA          | Del  | mother        |
| 14  | 58771632  | 58799361  | 27729   | I_trimester  | Dupl | mother        |
| 14  | 62654698  | 62734866  | 80168   | SGA          | Del  | mother        |
| 14  | 86284754  | 86310164  | 25410   | LGA          | Del  | father        |
| 14  | 86287347  | 86310164  | 22817   | SGA          | Del  | father        |
| 14  | 86287347  | 86332917  | 45570   | SGA          | Del  | mother        |
| 14  | 86287347  | 86310164  | 22817   | PE           | Del  | father        |
| 14  | 86287347  | 86310164  | 22817   | GD           | Del  | mother        |
| 14  | 86458414  | 86481388  | 22974   | GD           | Del  | father        |
| 14  | 86460915  | 86481388  | 20473   | SGA          | Del  | mother        |
| 14  | 88399488  | 88419358  | 19870   | II_trimester | Del  | mother        |
| 14  | 90758891  | 90802050  | 43159   | SGA          | Dupl | father        |
| 14  | 90788934  | 90802050  | 13116   | normal term  | Dupl | father        |
| 14  | 90788934  | 90802050  | 13116   | SGA          | Dupl | father        |
| 14  | 90788934  | 90802050  | 13116   | PE           | Dupl | father        |
| 14  | 90788934  | 90802050  | 13116   | GD           | Dupl | mother        |
| 14  | 90788934  | 90802050  | 13116   | GD           | Dupl | father        |
| 14  | 105951611 | 107287663 | 1336052 | GD           | Dupl | mother        |
| 14  | 105998544 | 107287663 | 1289119 | II_trimester | Dupl | mother        |
| 14  | 106326623 | 106866163 | 539540  | normal term  | Dupl | mother        |
| 15  | 20612840  | 22652330  | 2039490 | LGA          | Dupl | father        |
| 15  | 23077857  | 23114374  | 36517   | SGA          | Del  | mother        |
| 15  | 23084443  | 23114374  | 29931   | PE           | Del  | mother        |
| 15  | 24055488  | 24061497  | 6009    | normal term  | Del  | mother        |
| 15  | 24055488  | 24061497  | 6009    | LGA          | Del  | mother        |
| 15  | 24055488  | 24061497  | 6009    | II_trimester | Del  | mother        |
| 15  | 24357212  | 24472002  | 114790  | GD           | Del  | father        |
| 15  | 24594816  | 24742652  | 147836  | PE           | Dupl | father        |
| 15  | 24594816  | 24668007  | 73191   | LGA          | Dupl | mother        |
| 15  | 24594816  | 24668007  | 73191   | GD           | Dupl | mother        |
| 15  | 24606732  | 24668007  | 61275   | II_trimester | Dupl | mother        |
| 15  | 25420978  | 25430243  | 9265    | I_trimester  | Del  | mother        |
| 15  | 30369914  | 31089526  | 719612  | PE           | Del  | mother        |
| 15  | 32509892  | 32514341  | 4449    | GD           | Dupl | father        |
| 15  | 34760648  | 34800595  | 39947   | normal term  | Del  | father        |
| 15  | 34760648  | 34800595  | 39947   | GD           | Del  | mother        |
| 15  | 34760648  | 34800595  | 39947   | II_trimester | Del  | mother        |
| 15  | 34760648  | 34800595  | 39947   | I_trimester  | Del  | mother        |
| 15  | 35509148  | 35562582  | 53434   | SGA          | Del  | mother        |
| 15  | 36034333  | 36036487  | 2154    | II_trimester | Del  | mother        |
| 15  | 37437248  | 37501850  | 64602   | SGA          | Del  | father        |
| 15  | 42159110  | 42192040  | 32930   | PE           | Dupl | father        |
| 15  | 43893818  | 43939642  | 45824   | normal term  | Del  | father        |

| Chr | Start     | End       | Length  | Group        | Type | Mother/father |
|-----|-----------|-----------|---------|--------------|------|---------------|
| 15  | 43893818  | 43939642  | 45824   | PE           | Del  | mother        |
| 15  | 53518466  | 53593018  | 74552   | LGA          | Dupl | mother        |
| 15  | 61687640  | 61692518  | 4878    | GD           | Del  | mother        |
| 15  | 69696249  | 69735319  | 39070   | LGA          | Dupl | mother        |
| 15  | 81977465  | 82088114  | 110649  | PE           | Dupl | father        |
| 15  | 86511690  | 86521483  | 9793    | SGA          | Del  | father        |
| 15  | 86511690  | 86521483  | 9793    | SGA          | Del  | mother        |
| 15  | 87831146  | 87870024  | 38878   | PE           | Del  | mother        |
| 15  | 102338427 | 102366849 | 28422   | II_trimester | Dupl | mother        |
| 16  | 10149904  | 10164599  | 14695   | PE           | Del  | father        |
| 16  | 12686917  | 12730650  | 43733   | normal term  | Del  | father        |
| 16  | 15154898  | 15499057  | 344159  | PE           | Del  | father        |
| 16  | 20521796  | 20532514  | 10718   | normal term  | Del  | mother        |
| 16  | 20916286  | 20986506  | 70220   | LGA          | Del  | mother        |
| 16  | 22435811  | 22702769  | 266958  | SGA          | Del  | mother        |
| 16  | 28603889  | 28620752  | 16863   | PE           | Dupl | father        |
| 16  | 28615243  | 28620752  | 5509    | LGA          | Dupl | mother        |
| 16  | 31220869  | 31226691  | 5822    | SGA          | Del  | mother        |
| 16  | 32165782  | 33795687  | 1629905 | PE           | Del  | mother        |
| 16  | 32165782  | 33557021  | 1391239 | GD           | Del  | father        |
| 16  | 32608438  | 33557021  | 948583  | LGA          | Del  | mother        |
| 16  | 32608438  | 32648969  | 40531   | GD           | Del  | mother        |
| 16  | 34303923  | 34817176  | 513253  | I_trimester  | Dupl | mother        |
| 16  | 63520776  | 63582751  | 61975   | I_trimester  | Del  | mother        |
| 16  | 72723613  | 72785303  | 61690   | GD           | Del  | father        |
| 16  | 75571249  | 75580985  | 9736    | normal term  | Dupl | mother        |
| 16  | 79252324  | 79273682  | 21358   | I_trimester  | Del  | mother        |
| 17  | 1116991   | 1239946   | 122955  | PE           | Del  | mother        |
| 17  | 3506043   | 3582239   | 76196   | II_trimester | Del  | mother        |
| 17  | 6291337   | 6309355   | 18018   | GD           | Dupl | mother        |
| 17  | 6295959   | 6312267   | 16308   | normal term  | Dupl | father        |
| 17  | 6301562   | 6311397   | 9835    | GD           | Dupl | mother        |
| 17  | 19510081  | 19519444  | 9363    | LGA          | Del  | father        |
| 17  | 30858969  | 30866889  | 7920    | PE           | Del  | mother        |
| 17  | 33684035  | 33768199  | 84164   | LGA          | Del  | father        |
| 17  | 33684035  | 33768199  | 84164   | PE           | Del  | mother        |
| 17  | 33684035  | 33768199  | 84164   | II_trimester | Del  | mother        |
| 17  | 34456073  | 34476396  | 20323   | GD           | Dupl | mother        |
| 17  | 44131767  | 44580136  | 448369  | GD           | Dupl | mother        |
| 17  | 44161441  | 44580136  | 418695  | LGA          | Dupl | father        |
| 17  | 44161441  | 44368212  | 206771  | LGA          | Dupl | mother        |
| 17  | 44169808  | 44368212  | 198404  | normal term  | Dupl | mother        |
| 17  | 44169808  | 44580136  | 410328  | PE           | Dupl | mother        |
| 17  | 44169808  | 44580136  | 410328  | normal term  | Dupl | father        |
| 17  | 44169808  | 44368212  | 198404  | SGA          | Dupl | mother        |
| 17  | 44169808  | 44368212  | 198404  | LGA          | Dupl | mother        |
| 17  | 44169808  | 44580136  | 410328  | LGA          | Dupl | father        |



| Chr | Start    | End      | Length | Group        | Type | Mother/father |
|-----|----------|----------|--------|--------------|------|---------------|
| 17  | 44169808 | 44580136 | 410328 | GD           | Dupl | father        |
| 17  | 44169808 | 44580136 | 410328 | GD           | Dupl | father        |
| 17  | 44169808 | 44580136 | 410328 | GD           | Dupl | father        |
| 17  | 44169808 | 44580136 | 410328 | II_trimester | Dupl | mother        |
| 17  | 50949615 | 51314354 | 364739 | PE           | Del  | mother        |
| 17  | 50949615 | 51314354 | 364739 | GD           | Del  | father        |
| 17  | 54160465 | 54172277 | 11812  | normal term  | Del  | father        |
| 17  | 54160465 | 54172277 | 11812  | LGA          | Del  | mother        |
| 17  | 54160465 | 54172277 | 11812  | PE           | Del  | mother        |
| 17  | 60109041 | 60137085 | 28044  | normal term  | Del  | mother        |
| 17  | 64384076 | 64504644 | 120568 | SGA          | Del  | father        |
| 17  | 64410915 | 64482151 | 71236  | LGA          | Del  | father        |
| 17  | 66566063 | 66581506 | 15443  | LGA          | Del  | mother        |
| 17  | 77365534 | 77392001 | 26467  | GD           | Dupl | father        |
| 17  | 77367698 | 77396482 | 28784  | SGA          | Dupl | father        |
| 17  | 77367698 | 77394037 | 26339  | LGA          | Dupl | father        |
| 17  | 77367698 | 77394037 | 26339  | PE           | Dupl | father        |
| 18  | 1725758  | 1841469  | 115711 | SGA          | Del  | mother        |
| 18  | 1725758  | 1839339  | 113581 | I_trimester  | Del  | mother        |
| 18  | 10433382 | 10439153 | 5771   | LGA          | Dupl | father        |
| 18  | 10913663 | 10919989 | 6326   | normal term  | Del  | father        |
| 18  | 10915570 | 10924184 | 8614   | LGA          | Del  | mother        |
| 18  | 27815320 | 27815968 | 648    | PE           | Del  | father        |
| 18  | 27815320 | 27815968 | 648    | PE           | Del  | father        |
| 18  | 30901989 | 31009751 | 107762 | SGA          | Dupl | mother        |
| 18  | 55935987 | 55937109 | 1122   | II_trimester | Del  | mother        |
| 18  | 58101865 | 58120273 | 18408  | GD           | Del  | mother        |
| 18  | 63196448 | 63218786 | 22338  | GD           | Dupl | father        |
| 18  | 63849680 | 63866787 | 17107  | PE           | Dupl | father        |
| 18  | 63909072 | 63912698 | 3626   | SGA          | Del  | mother        |
| 18  | 65248521 | 65690189 | 441668 | LGA          | Dupl | father        |
| 18  | 66747568 | 66755508 | 7940   | normal term  | Del  | father        |
| 18  | 66747568 | 66755508 | 7940   | LGA          | Del  | father        |
| 18  | 66747568 | 66755508 | 7940   | LGA          | Del  | mother        |
| 18  | 66747568 | 66755508 | 7940   | LGA          | Del  | father        |
| 18  | 66747568 | 66755508 | 7940   | PE           | Del  | mother        |
| 18  | 66747568 | 66755508 | 7940   | PE           | Del  | father        |
| 18  | 66747568 | 66755508 | 7940   | I_trimester  | Del  | mother        |
| 18  | 67209141 | 67217271 | 8130   | normal term  | Del  | father        |
| 18  | 67209141 | 67217271 | 8130   | SGA          | Del  | mother        |
| 18  | 67209141 | 67217271 | 8130   | LGA          | Del  | father        |
| 18  | 67209141 | 67217271 | 8130   | PE           | Del  | father        |
| 19  | 1781879  | 1792997  | 11118  | PE           | Del  | mother        |
| 19  | 5563342  | 5606259  | 42917  | PE           | Del  | mother        |
| 19  | 6958134  | 7018869  | 60735  | GD           | Del  | father        |
| 19  | 20626179 | 20707568 | 81389  | normal term  | Del  | mother        |
| 19  | 20626179 | 20707568 | 81389  | normal term  | Del  | father        |

| Chr | Start    | End      | Length | Group        | Type | Mother/father |
|-----|----------|----------|--------|--------------|------|---------------|
| 19  | 20626179 | 20707568 | 81389  | SGA          | Del  | father        |
| 19  | 20626179 | 20707568 | 81389  | SGA          | Del  | mother        |
| 19  | 20626179 | 20707568 | 81389  | SGA          | Del  | father        |
| 19  | 20626179 | 20707568 | 81389  | PE           | Del  | mother        |
| 19  | 20626179 | 20707568 | 81389  | PE           | Del  | father        |
| 19  | 20657781 | 20707568 | 49787  | SGA          | Del  | father        |
| 19  | 20663314 | 20707568 | 44254  | GD           | Del  | mother        |
| 19  | 20682055 | 20707568 | 25513  | LGA          | Del  | mother        |
| 19  | 20691114 | 20707568 | 16454  | normal term  | Del  | father        |
| 19  | 20691114 | 20707568 | 16454  | normal term  | Del  | father        |
| 19  | 20691114 | 20707568 | 16454  | normal term  | Del  | mother        |
| 19  | 20691114 | 20707568 | 16454  | SGA          | Del  | father        |
| 19  | 20691114 | 20707568 | 16454  | PE           | Del  | mother        |
| 19  | 20691114 | 20707568 | 16454  | PE           | Del  | mother        |
| 19  | 20691114 | 20707568 | 16454  | GD           | Del  | father        |
| 19  | 20691114 | 20707568 | 16454  | GD           | Del  | mother        |
| 19  | 20691114 | 20707568 | 16454  | GD           | Del  | father        |
| 19  | 20691114 | 20707568 | 16454  | II_trimester | Del  | mother        |
| 19  | 20691114 | 20707568 | 16454  | II_trimester | Del  | mother        |
| 19  | 20691114 | 20707568 | 16454  | I_trimester  | Del  | mother        |
| 19  | 20691114 | 20707568 | 16454  | I_trimester  | Del  | mother        |
| 19  | 20691114 | 20707568 | 16454  | I_trimester  | Del  | mother        |
| 19  | 35587635 | 35597215 | 9580   | GD           | Del  | mother        |
| 19  | 35587635 | 35600510 | 12875  | II_trimester | Del  | mother        |
| 19  | 41350895 | 41379148 | 28253  | GD           | Dupl | mother        |
| 19  | 41356751 | 41379148 | 22397  | PE           | Del  | father        |
| 19  | 41356751 | 41379148 | 22397  | LGA          | Del  | father        |
| 19  | 41356751 | 41379148 | 22397  | GD           | Del  | father        |
| 19  | 43270565 | 43699208 | 428643 | normal term  | Del  | mother        |
| 19  | 43328006 | 43556843 | 228837 | PE           | Del  | mother        |
| 19  | 43328006 | 43537378 | 209372 | normal term  | Del  | father        |
| 19  | 43328006 | 43559330 | 231324 | normal term  | Del  | mother        |
| 19  | 43328006 | 43556843 | 228837 | SGA          | Del  | mother        |
| 19  | 43371294 | 43699208 | 327914 | I_trimester  | Del  | mother        |
| 19  | 43372386 | 43468660 | 96274  | PE           | Del  | mother        |
| 19  | 43372386 | 43802290 | 429904 | GD           | Del  | mother        |
| 19  | 43635684 | 43699208 | 63524  | PE           | Del  | mother        |
| 19  | 43666697 | 43835770 | 169073 | I_trimester  | Del  | mother        |
| 19  | 50526896 | 50905042 | 378146 | normal term  | Dupl | mother        |
| 19  | 51260989 | 51263510 | 2521   | LGA          | Dupl | mother        |
| 19  | 52273257 | 52617298 | 344041 | GD           | Dupl | mother        |
| 20  | 7957766  | 7962072  | 4306   | PE           | Dupl | father        |
| 20  | 12807016 | 12889314 | 82298  | I_trimester  | Dupl | mother        |
| 20  | 14794361 | 14931186 | 136825 | I_trimester  | Del  | mother        |
| 20  | 31806588 | 31814348 | 7760   | PE           | Del  | mother        |
| 20  | 37026342 | 37045533 | 19191  | SGA          | Dupl | father        |
| 20  | 44351421 | 44378173 | 26752  | GD           | Del  | father        |

| Chr | Start    | End      | Length | Group        | Type | Mother/father |
|-----|----------|----------|--------|--------------|------|---------------|
| 20  | 58956161 | 58962376 | 6215   | PE           | Dupl | father        |
| 20  | 61393873 | 61412466 | 18593  | PE           | Del  | mother        |
| 21  | 10827533 | 10913441 | 85908  | LGA          | Del  | mother        |
| 21  | 21916116 | 21918415 | 2299   | normal term  | Del  | mother        |
| 21  | 24020223 | 24043069 | 22846  | SGA          | Del  | father        |
| 21  | 35027142 | 35056247 | 29105  | PE           | Del  | mother        |
| 21  | 44821867 | 44853859 | 31992  | II_trimester | Dupl | mother        |
| 22  | 18844632 | 19008108 | 163476 | normal term  | Del  | mother        |
| 22  | 22314463 | 22573637 | 259174 | LGA          | Dupl | father        |
| 22  | 25629682 | 25998204 | 368522 | LGA          | Dupl | father        |
| 22  | 25669569 | 25914593 | 245024 | GD           | Del  | father        |
| 22  | 25832419 | 25843884 | 11465  | normal term  | Del  | mother        |
| 22  | 25832419 | 25843884 | 11465  | normal term  | Del  | mother        |
| 22  | 25832419 | 25843884 | 11465  | SGA          | Del  | mother        |
| 22  | 25832419 | 25843884 | 11465  | SGA          | Del  | mother        |
| 22  | 25832419 | 25843884 | 11465  | SGA          | Del  | father        |
| 22  | 25832419 | 25843884 | 11465  | LGA          | Del  | father        |
| 22  | 25832419 | 25843884 | 11465  | PE           | Del  | mother        |
| 22  | 25832419 | 25843884 | 11465  | PE           | Del  | mother        |
| 22  | 25832419 | 25843884 | 11465  | II_trimester | Del  | mother        |
| 22  | 39428919 | 39445556 | 16637  | normal term  | Del  | mother        |
| 22  | 40049410 | 40065322 | 15912  | normal term  | Del  | mother        |

\* paternal genotype data not available. Chr, chromosome; SGA, small-for-gestational age; GD, gestational diabetes; PE, preeclampsia; LGA, large-for-gestational age; Dupl, duplication; Del, deletion.

**Supplementary Table 4. Characteristics of maternal and paternal CNVs**

| <i>Maternal blood DNA samples</i>                 |      |                    |               |               |               |              |              |
|---------------------------------------------------|------|--------------------|---------------|---------------|---------------|--------------|--------------|
|                                                   |      | <b>Normal term</b> | <b>SGA</b>    | <b>LGA</b>    | <b>PE</b>     | <b>GD</b>    | <b>Total</b> |
| <b>No of samples</b>                              |      | 8                  | 8             | 8             | 8             | 8            | 40           |
| <b>No of CNVs per sample</b>                      | all  | 8.1 (8.0)          | 9.4 (8.0)     | 8.3 (8.5)     | 10.4 (10.5)   | 11.1 (10.0)  | 9.5 (9.0)    |
|                                                   | dupl | 1.9 (1.0)          | 1.6 (1.0)     | 2.3 (2.0)     | 2.4 (2.5)     | 3.9 (4.0)    | 2.4 (2.0)    |
|                                                   | del  | 6.3 (7.0)          | 7.8 (7.0)     | 6.0 (6.0)     | 8.0 (7.5)     | 7.3 (7.0)    | 7.1 (7.0)    |
| <b>Cumulative span of all CNVs per sample, Mb</b> | all  | 0.6 (0.6)          | 0.5 (0.4)     | 0.6 (0.3)     | 1.5 (1.2)     | 1.2 (0.7)    | 0.8 (0.5)    |
|                                                   | dupl | 0.3 (0.1)          | 0.2 (0.1)     | 0.3 (0.2)     | 0.8 (0.7)     | 0.8 (0.4)    | 0.5 (0.3)    |
|                                                   | del  | 0.3 (0.2)          | 0.3 (0.3)     | 0.3 (0.3)     | 0.6 (0.4)     | 0.3 (0.3)    | 0.3 (0.3)    |
| <b>CNV length across samples, kb</b>              | all  | 69.2 (24.3)        | 55.9 (22.6)   | 76.2 (23.5)   | 140.2 (24.6)  | 104.5 (28.3) | 88.4 (24.3)  |
|                                                   | dupl | 149.5 (83.3)       | 125.1 (107.8) | 134.1 (70.3)  | 354.2 (142.4) | 216.8 (58.1) | 208.4 (82.8) |
|                                                   | del  | 45.1 (18.4)        | 41.4 (21.1)   | 54.5 (14.0)   | 76.6 (19.3)   | 44.4 (21.6)  | 47.3 (17.6)  |
| <b>CNV size range, kb</b>                         | all  | 0.3; 539.5         | 1.3; 610.6    | 0.3; 948.6    | 0.3; 2,392.4  | 0.3; 1,420.2 | 0.3; 2,392.4 |
|                                                   | dupl | 2.2; 539.5         | 10.3; 610.6   | 2.5; 812.5    | 10.5; 2,392.4 | 9.8; 1,420.2 | 2.2; 2,392.4 |
|                                                   | del  | 0.3; 428.6         | 1.3; 267.0    | 0.3; 948.6    | 0.3; 1,629.9  | 0.3; 429.9   | 0.3; 1,629.9 |
| <b>Ratio (loss/gain)</b>                          |      | 3.3 (7.0)          | 4.8 (7.0)     | 2.7 (3.0)     | 3.4 (3.0)     | 1.9 (1.8)    | 2.9 (3.5)    |
| <i>Paternal blood DNA samples</i>                 |      |                    |               |               |               |              |              |
|                                                   |      | <b>Normal term</b> | <b>SGA</b>    | <b>LGA</b>    | <b>PE</b>     | <b>GD</b>    | <b>Total</b> |
| <b>No of samples</b>                              |      | 8                  | 7             | 7             | 8             | 8            | 38           |
| <b>No of CNVs per sample</b>                      | all  | 9.0 (10.5)         | 7.4 (7.0)     | 10.1 (9.0)    | 8.5 (8.5)     | 11.4 (10.5)  | 9.3 (9.0)    |
|                                                   | dupl | 2.8 (2.5)          | 2.7 (3.0)     | 3.3 (4.0)     | 3.3 (3.5)     | 3.1 (3.0)    | 3.0 (3.0)    |
|                                                   | del  | 6.3 (7.0)          | 4.7 (4.0)     | 6.9 (6.0)     | 5.3 (5.5)     | 8.3 (7.0)    | 6.3 (6.0)    |
| <b>Cumulative span of all CNVs per sample, Mb</b> | all  | 0.7 (0.7)          | 0.3 (0.3)     | 1.2 (1.0)     | 0.8 (0.9)     | 1.0 (0.8)    | 0.8 (0.6)    |
|                                                   | dupl | 0.3 (0.3)          | 0.1 (0.1)     | 0.9 (0.9)     | 0.6 (0.3)     | 0.4 (0.2)    | 0.5 (0.2)    |
|                                                   | del  | 0.3 (0.1)          | 0.2 (0.2)     | 0.3 (0.3)     | 0.3 (0.2)     | 0.6 (0.4)    | 0.3 (0.2)    |
| <b>CNV length across samples, kb</b>              | all  | 73.6 (19.1)        | 42.9 (27.7)   | 122.0 (31.9)  | 97.4 (17.0)   | 86.7 (19.9)  | 86.7 (22.8)  |
|                                                   | dupl | 123.8 (81.5)       | 51.4 (33.9)   | 288.2 (144.9) | 171.5 (40.2)  | 122.2 (30.5) | 155.2 (51.4) |
|                                                   | del  | 51.5 (12.1)        | 38.0 (21.1)   | 42.3 (23.9)   | 51.5 (9.3)    | 73.3 (17.8)  | 53.8 (16.5)  |
| <b>CNV size range, kb</b>                         | all  | 0.3; 493.7         | 2.1; 265.4    | 1.7; 2,039.5  | 0.3; 1281.1   | 0.3; 1391.2  | 0.3; 2,039.5 |
|                                                   | dupl | 2.2; 493.7         | 10.6; 197.3   | 5.8; 2,039.5  | 2.2; 1281.1   | 2.5; 477.0   | 2.2; 2,039.5 |
|                                                   | del  | 0.3; 477.2         | 2.1; 265.4    | 1.7; 337.4    | 0.3; 670.6    | 0.3; 1,391.2 | 0.3; 1,391.2 |
| <b>Ratio (loss/gain)</b>                          |      | 2.3 (2.8)          | 1.7 (1.3)     | 2.1 (1.5)     | 1.6 (1.6)     | 2.6 (2.3)    | 2.1 (2.0)    |

No, number; SGA, small-for-gestational age; GD, gestational diabetes; PE, preeclampsia; LGA, large-for-gestational age; all, duplication and deletion CNVs; dupl, duplication; del, deletion.

**Supplementary Table 5. Pathway analysis of all somatic and inherited placental and parental CNVs**

**a. Placental somatic CNVs**

| <i>Somatic duplications in the placental genome</i> |               |                                          |             |                     |                  |                |                  |                                                                                                                                                                                                                                                                |
|-----------------------------------------------------|---------------|------------------------------------------|-------------|---------------------|------------------|----------------|------------------|----------------------------------------------------------------------------------------------------------------------------------------------------------------------------------------------------------------------------------------------------------------|
| category_ID                                         | category_type | category_name                            | FDR_p-value | n_genes_in_category | n_genes_in_query | n_common_genes | %_genes_category | common_genes                                                                                                                                                                                                                                                   |
| GO:0009952                                          | BP            | anterior/posterior pattern specification | 1.34E-05    | 202                 | 1186             | 21             | 10.4%            | <i>SKI,HTT,HOXA1,HOXA2,HOXA3,HOXA4,HOXA5,HOXA6,HOXA7,HOXA10,HOXA11,RP11-834C11.14,HOXC13,HOXC11,HOXC10,HOXC6,HOXC9,HOXC8,HOXC5,MYF6,MYF5</i>                                                                                                                   |
| GO:0007156                                          | BP            | homophilic cell adhesion                 | 3.48E-05    | 139                 | 1186             | 17             | 12.2%            | <i>ROBO2,FAT4,PCDHA1,PCDHA2,PCDHA3,PCDHA4,PCDHA5,PCDHA6,PCDHA7,PCDHA8,PCDHA9,PCDHA10,PCDHA11,PCDHA12,PCDHA13,PCDH15,CDH19</i>                                                                                                                                  |
| GO:0048706                                          | BP            | embryonic skeletal system development    | 2.33E-04    | 122                 | 1186             | 15             | 12.3%            | <i>COL11A1,HOXA1,HOXA2,HOXA3,HOXA4,HOXA5,HOXA6,HOXA7,HOXA11,RP11-834C11.14,HOXC11,HOXC6,HOXC9,HOXC5,MYF5</i>                                                                                                                                                   |
| GO:0005509                                          | MF            | calcium ion binding                      | 2.43E-04    | 688                 | 1186             | 39             | 5.7%             | <i>SDF4,PLCH2,MEGF6,PEF1,RYR2,NRXN1,LRP1B,GCA,TTN,ATP2B2,SLIT2,FAT4,FSTL5,EDIL3,MCTP1,PCDHA1,PCDHA2,PCDHA3,PCDHA4,PCDHA5,PCDHA6,PCDHA7,PCDHA8,PCDHA9,PCDHA10,PCDHA11,PCDHA12,PCDHA13,MICU3,PCDH15,C2CD5,NELL2,SYT1,JAG2,RAB11FIP3,RHOT2,RHBDL1,CDH19,PLCB4</i> |
| GO:0072562                                          | CC            | blood microparticle                      | 7.35E-04    | 133                 | 1186             | 15             | 11.3%            | <i>CPSF3L,ALB,CFB,CFB,C4A,C4B,POTEG,IGHA2,IGHG4,IGHG2,IGHA1,IGHG1,IGHG3,IGHD,IGHM</i>                                                                                                                                                                          |
| GO:0048704                                          | BP            | embryonic skeletal system morphogenesis  | 2.13E-03    | 91                  | 1186             | 12             | 13.2%            | <i>COL11A1,HOXA1,HOXA2,HOXA3,HOXA4,HOXA5,HOXA6,HOXA7,HOXA11,HOXC11,HOXC9,MYF5</i>                                                                                                                                                                              |
| MI:hsa-miR-210                                      | mi            | MI:hsa-miR-210                           | 3.90E-03    | 649                 | 1186             | 34             | 5.2%             | <i>C1ORF222,C1ORF86,PEX10,MEGF6,RP11-181G12.2,LINC00982,COL16A1,GPR17,DUSP28,CAPN10,GAK,FGFRL1,RNF212,LRPAP1,FGF10,UQC2,IP6K3,GRIK2,STXBP5,ZNF467,TIGD5,CARD9,GRM5,OR4K14,IGHV3-13,IGHV3-16,IGHV3-23,IGHV3-35,IGHV3-38,IGHV3-66,IGHA2,FBXL16,PSG4,SPO11</i>    |
| GO:0006956                                          | BP            | complement activation                    | 3.00E-02    | 64                  | 1186             | 9              | 14.1%            | <i>C2,CFB,C4A,C4B,IGHG4,IGHG2,IGHG1,IGHG3</i>                                                                                                                                                                                                                  |

*Somatic deletions in the placental genome*

| category_ID | category_type | category_name                              | FDR_p-value | n_genes_in_category | n_genes_in_query | n_common_genes | %_genes_category | common_genes                                                                                                                                                                                                                                                                                                                                                                                                                                                                                                                              |
|-------------|---------------|--------------------------------------------|-------------|---------------------|------------------|----------------|------------------|-------------------------------------------------------------------------------------------------------------------------------------------------------------------------------------------------------------------------------------------------------------------------------------------------------------------------------------------------------------------------------------------------------------------------------------------------------------------------------------------------------------------------------------------|
| GO:0022402  | BP            | cell cycle process                         | 3.49E-05    | 1163                | 1294             | 61             | 5.2%             | <i>CDK11A,KHDRBS1,MACF1,NSL1,SPAST,BIRC6,MTA3,MSH2,ACTR2,SKIL,SENP2,TP63,PLK4,JMY,CDC23,CDC25C,KATNA1,LATS1,NUP43,CDK13,MPLKIP,RINT1,ZC3HC1,VCPIPI,EYAI,HAUS6,PPP6C,CDI123,DNA2,TACC2,NUP98,RAD52,KIAA0391,PSMA6,POLE2,BMP4,INO80,OIP5,NUSAP1,HAUS2,STAR9,MEIOB,PAPD5,IST1,TXNL4B,NCOR1,CENPV,TAOK1,CRLF3,MED1,CDC6,SEPT4,TEX14,RAD51C,TRIM37,SKA2,RPS6KB1,PPM1D,CLTCL1,CHEK2,E</i>                                                                                                                                                       |
| GO:0035639  | MF            | purine ribonucleoside triphosphate binding | 4.60E-05    | 1855                | 1294             | 84             | 4.5%             | <i>CDK11A,NMNAT1,KIF1B,CMPK1,EPRS,IARS2,NVL,KIF3C,RAB10,SPAST,NLRC4,MSH2,RAB1A,ACTR2,ULK4,VPRBP,RAD54L2,DNAH12,ARF4,EPHA3,RAP2B,PRKCI,PAK2,DCK,HSPA4L,PLK4,NAIP,PAPD4,SAR1B,DDX46,MDN1,CDK19,SGK1,KATNA1,LATS1,RAC1,CDK13,SRPK2,UBE2H,C8ORF44-SGK3,SGK3,MCMDC2,RRAGA,UBE2R2,KIF27,HSPA5,PRKG1,DNA2,GLUD1,RHOG,RRM1,PIK3C2A,ATL3,MARK2,RHOD,RAB6A,RAB39A,DGKA,PCCA,KIAA0391,PSMA6,INO80,STARD9,TRPM7,SMG1,MAPK3,SEPHS2,AARS,DDX19B,RP11-529K1.3,DDX19A,UBE2G1,ERAL1,TAOK1,ATAD5,DC6,SEPT4,TEX14,RAD51C,DHX40,TUBD1,RPS6KB1,RIOK3,CHEK2</i> |
| GO:1902589  | BP            | single-organism organelle organization     | 1.15E-04    | 1738                | 1294             | 79             | 4.5%             | <i>CDK11A,NSL1,ARID4B,TBCE,DPY30,SPAST,BIRC6,MSH2,ACTR2,TMSB10,TRIP12,VPRBP,EPHA3,DPPA2,PRKCI,YEATS2,PAK2,PLK4,JMY,JADE2,SAR1B,SEC24A,CDC23,CDC25C,NSD1,KATNA1,LATS1,NUP43,RAC1,CDK13,MPLKIP,ZC3HC1,VCPIPI,EYAI,HAUS6,AB11,PRKG1,DNA2,TET1,TACC2,RHOG,KDM2A,RAB39A,RAD52,EEA1,POLE2,BMP4,SYNE2,INO80,CHP1,OIP5,NUSAP1,RTF1,HAUS2,STARD9,TRPM7,MEIOB,COQ7,CLN3,CLN3,MAPK3,PAPD5,TXNL4B,NCOR1,CENPV,TEFM,NF1,CDC6,TEX14,RAD51C,PPM1E,TRIM37,SKA2,TUBD1,PHF20,NCOA3</i>                                                                      |

|            |    |                                          |          |       |      |     |      |                                                                                                                                                                                                                                                                                                                                                                                                                                                                                                                                                                                                                                                                                                                                                                                                                                                               |
|------------|----|------------------------------------------|----------|-------|------|-----|------|---------------------------------------------------------------------------------------------------------------------------------------------------------------------------------------------------------------------------------------------------------------------------------------------------------------------------------------------------------------------------------------------------------------------------------------------------------------------------------------------------------------------------------------------------------------------------------------------------------------------------------------------------------------------------------------------------------------------------------------------------------------------------------------------------------------------------------------------------------------|
| GO:0032550 | MF | purine ribonucleoside binding            | 2.33E-04 | 1861  | 1294 | 82  | 4.4% | ,CLTCL1,CHEK2,EP300<br>CDK11A,NMNAT1,KIF1B,CMPK1,EPRS,IARS2,NVL,<br>KIF3C,RAB10,SPAST,NLRC4,MSH2,RAB1A,ACTR2,<br>ULK4,VPRBP,RAD54L2,DNAH12,ARF4,EPHA3,RAP<br>2B,PRKCI,PAK2,DCK,HSPA4L,PLK4,NAIP,PAPD4,<br>SARIB,DDX46,MDN1,CDK19,SGK1,KATNA1,LATS1<br>,RAC1,CDK13,SRPK2,UBE2H,C8ORF44-<br>SGK3,SGK3,MCMDC2,RRAGA,UBE2R2,KIF27,HSP<br>A5,PRKG1,DNA2,GLUD1,RHOG,RRM1,PIK3C2A,A<br>TL3,MARK2,RHOD,RAB6A,RAB39A,DGKA,PCCA,I<br>NO80,STARD9,TRPM7,SMG1,MAPK3,SEPHS2,AAR<br>S,DDX19B,RP11-<br>529K1.3,DDX19A,UBE2G1,ERAL1,TAOK1,ATAD5,C<br>DC6,SEPT4,TEX14,RAD51C,DHX40,TUBD1,RPS6K<br>B1,RIOK3,CHEK2                                                                                                                                                                                                                                                               |
| GO:0007017 | BP | microtubule-based process                | 1.87E-03 | 498   | 1294 | 32  | 6.4% | KIF1B,MACF1,TBCE,LYST,KIF3C,MEMO1,SPAST,R<br>AB1A,ULK4,DNAH12,EPHA3,PLK4,KATNA1,EYAI,<br>HAUS6,KIF27,TACC2,RAB6A,INO80,CHP1,NUSAP1<br>,HAUS2,STARD9,DYX1C1,CLN3,CLN3,NCOR1,TEX<br>14,TRIM37,SKA2,TUBD1,CHEK2                                                                                                                                                                                                                                                                                                                                                                                                                                                                                                                                                                                                                                                  |
| GO:0043231 | CC | intracellular membrane-bounded organelle | 2.14E-03 | 10046 | 1294 | 296 | 2.9% | CDK11A,NMNAT1,KIF1B,SPEN,USP48,SRRM1,CLI<br>C4,PTP4A2,KHDRBS1,KPNA6,ZBTB8B,ZBTB8A,ZB<br>TB8OS,AKIRINI,NDUFS5,MACF1,CMPK1,COA7,E<br>CHDC2,SCP2,PPAP2B,TAF13,RABGAP1L,NSLI,TA<br>TDN3,FLVCRI,IARS2,DEGS1,NVL,CNIH4,TOMM20<br>,RBM34,ARID4B,B3GALNT2,ZNF670,ZNF695,RAB1<br>0,MEMO1,DPY30,SPAST,SLC30A6,YIPF4,BIRC6,CO<br>X7A2L,KCNG3,MTA3,MSH2,RAB1A,MBD5,TRIP12,<br>SH3BP5,TRAK1,QRICHI,VPRBP,RAD54L2,SFMBTI<br>,HESX1,APPL1,PDE12,ARF4,DENND6A,EPHA3,DP<br>PA2,DPPA4,RAP2B,PHC3,PRKCI,SKIL,TBL1XR1,Y<br>EATS2,SEN2,KNG1,TP63,LEPREL1,PAK2,SEN2,<br>UTP3,GRSF1,MOB1B,DCK,HSPA4L,PLK4,MFSD8,L<br>RBA,RPS3A,SH3D19,OCN,ETF2H2C,SMN2,SMN1,<br>DMGDH,JMY,PAPD4,ALDH7A1,PHAX,LMNB1,JAD<br>E2,SARIB,SEC24A,CAMLG,DDX46,PCBD2,CDC23,<br>GFRA3,CDC25C,ATP6V0E1,CREBRF,NSD1,CASP8<br>AP2,MDN1,C6ORF203,GTF3C6,RPF2,SGK1,PCMT<br>1,KATNA1,NUP43,FAM220A,RAC1,TRA2A,CDK13, |

GO:0007067 BP mitosis 3.04E-03 364 1294 26 7.1%

MPLKIP,SUGCT,SRPK2,RINT1,ZC3HC1,KLHDC10,MTUS1,SNTG1,ARMC1,MTFR1,PTTG3P,MYBL1,VCPIPI,C8ORF44-SGK3,C8ORF44,SGK3,TCF24,EYA1,TPD52,RRAGA,PLIN2,DENND4C,RPS6,ACER2,UBAP1,SCAI,RABEPK,HSPA5,GAPVD1,FNBPI,ABI1,PRKG1,HNRNPH3,RUFY2,DNA2,SLC25A16,TET1,CCAR1,STOX1,GLUD1,LCOR,ARHGAP19-SLIT1,ARHGAP19,ATE1,NSMCE4A,TACC2,NUP98,PGAP2,STIM1,RRM1,DENND5A,IPO7,ZNF143,PIK3C2A,NUCB2,CTD-2132H18.3,PLA2G16,ATL3,RTN3,MARK2,RCOR2,KDM2A,RAB6A,MRPL48,RAB39A,RAD52,ERC1,OLR1,GABARAPL1,MUC19,WIBG,EEA1,PSPC1,ZMYM5,ZMYM2,NBEA,PCCA,KIAA0391,PSMA6,POLE2,SGPPI,SYNE2,SNRPN,INO80,CHP1,OIP5,NUSAPI,NDUFAF1,RTF1,ZNF106,SNAP23,HAUS2,STARD9,SPPL2A,DYX1C1,DPP8,PTPLAD1,FAHD1,MEIOB,ATF7IP2,PARN,BFAR,SMG1,COQ7,CLN3,CLN3,MAPK3,ZNF771,PAPD5,CNOT1,GOT2,NFATC3,DDX19B,DDX19A,ST3GAL2,PHLPP2,APIG1,ATXN1L,IST1,ZNF821,DHODH,TXNL4B,NCOR1,PIGL,CENPV,ERAL1,LOT2,PHF12,NUFIP2,ATAD5,TEFM,ADAP2,NF1,MEI1,CDC6,KPNB1,NPEPPS,MTMR4,SEPT4,RAD51C,PPM1E,TRIM37,YPEL2,PTRH2,VMP1,TUBD1,RPSS6KB1,CA4,USP32,APPBP2,PPM1D,BCAS3,TRAPPC8,TICAM1,PLIN3,ZNF317,CYP2A6,CYP2A7,SULT2B1,PHF20,ZMYND8,NCOA3,CLTCL1,HIRA,CHEK2,HSCB,XBP1,RBFOX2,MKL1,SLC25A17,XPNPEP3,RBX1,EP300,L3MBTL2,PPP6R2CDK11A,NSL1,BIRC6,CDC23,CDC25C,KATNA1,LATS1,NUP43,CDK13,MPLKIP,ZC3HC1,VCPIPI,HAUS6,BMP4,INO80,OIP5,NUSAPI,HAUS2,PAPD5,TXNL4B,CENPV,CDC6,TEX14,SKA2,CLTCL1,CHEK2



|            |    |             |          |      |      |     |      |                                                                                                                                                                                                                                                                                                                                                                                                                                                                                                                                                                                                                                                      |
|------------|----|-------------|----------|------|------|-----|------|------------------------------------------------------------------------------------------------------------------------------------------------------------------------------------------------------------------------------------------------------------------------------------------------------------------------------------------------------------------------------------------------------------------------------------------------------------------------------------------------------------------------------------------------------------------------------------------------------------------------------------------------------|
| GO:0005829 | CC | cytosol     | 4.51E-03 | 2664 | 1294 | 102 | 3.8% | <i>FBLIM1,SRRM1,CLIC4,CMPK1,NSLI,EPRS,BPNT1,GGPS1,LYST,KIF3C,MEMO1,NLRC4,RAB1A,ACTR2,APPL1,ARF4,RAP2B,PRKCI,TP63,PAK2,MOB1B,DCCK,PLK4,RPS3A,SH3D19,OCLN,SMN2,SMN1,BHMT,ALDH7A1,PHAX,SAR1B,SEC24A,CDC23,CDC25C,RPL26L1,AMD1,SGK1,LATS1,NUP43,RAC1,ASL,C8ORF44-SGK3,SGK3,DENND4C,RPS6,UBAP1,PPP6C,GAPVDI,ABII,PRKG1,PIK3API,ARHGAP19-SLIT1,ARHGAP19,NUP98,RHOG,RRM1,PIK3C2A,NUCB2,PLA2G16,RHOD,RAB6A,ERC1,DGKA,EEA1,ZMYM2,NBEA,PCCA,KIAA0391,PSMA6,CHP1,ZNF106,HAUS2,EDC3,FAHD1,PARN,SMG1,MAPK3,DCTPP1,CNOT1,NFATC3,AARS,PHLPP2,AP1G1,ISTI,TAOK1,RNF135,WIPF2,CDC6,KPNB1,NPEPPS,MTMR4,TRIM37,SKA2,SMG8,PTRH2,RPS6KB1,DPP9,TICAM1,SULT2B1,ST13,RBX1</i> |
| GO:0005874 | CC | microtubule | 2.79E-02 | 362  | 1294 | 24  | 6.6% | <i>KIF1B,MACF1,WDR47,TCBE,KIF3C,SPAST,DNAHI2,TBL1XR1,KATNA1,MTUS1,HAUS6,KIF27,STIM1,C LMP,GABARAPL1,INO80,NUSAP1,HAUS2,NCOR1,SKA2,TUBD1,APPBP2,CYP2A6,CYP2A7</i>                                                                                                                                                                                                                                                                                                                                                                                                                                                                                     |

## b. Placental inherited CNVs

### *Inherited duplications in the placental genome*

No significant enrichment

### *Inherited deletions in the placental genome*

| category_ID    | category_type | category_name                          | FDR_p-value | n_genes_in_category | n_genes_in_query | n_common_genes | %_genes_category | common_genes                                                |
|----------------|---------------|----------------------------------------|-------------|---------------------|------------------|----------------|------------------|-------------------------------------------------------------|
| GO:0007565     | BP            | female pregnancy                       | 1.54E-06    | 174                 | 117              | 9              | 5.2%             | <i>RLN1,PSG1,PSG6,PSG7,PSG11,PSG2,PSG5,PSG4,PSG9</i>        |
| GO:0016160     | MF            | amylase activity                       | 8.06E-04    | 6                   | 117              | 3              | 50.0%            | <i>AMY2A,AMY1A,MGAM</i>                                     |
| MI:hsa-miR-19a | mi            | MI:hsa-miR-19a                         | 1.29E-02    | 766                 | 117              | 9              | 1.2%             | <i>DABI,TACSTD2,CFHR2,SFMBT1,PCDH15,PSG1,PSG6,PSG2,PSG9</i> |
| GO:0008389     | MF            | coumarin 7-hydroxylase activity        | 1.61E-02    | 2                   | 117              | 2              | 100.0%           | <i>CYP2A6,CYP2A7</i>                                        |
| GO:0004970     | MF            | ionotropic glutamate receptor activity | 3.22E-02    | 18                  | 117              | 3              | 16.7%            | <i>GRID2,GRIK4,GRIN2A</i>                                   |

|            |    |                                                    |          |      |     |    |       |                                                                                                                                               |
|------------|----|----------------------------------------------------|----------|------|-----|----|-------|-----------------------------------------------------------------------------------------------------------------------------------------------|
| GO:0005576 | CC | extracellular region                               | 3.27E-02 | 3655 | 117 | 23 | 0.6%  | <i>CELA2A,CELA2B,TACSTD2,AMY2A,AMY1A,CFHR2,CFHR4,COL21A1,MSR1,MTUS1,RLN1,CCDC3,PCDH15,NRG3,PSG1,PSG6,PSG7,PSG11,PSG2,PSG5,PSG4,PSG9,DGCR6</i> |
| GO:0005234 | MF | extracellular-glutamate-gated ion channel activity | 3.81E-02 | 19   | 117 | 3  | 15.8% | <i>GRID2,GRIK4,GRIN2A</i>                                                                                                                     |
| GO:0046226 | BP | coumarin catabolic process                         | 4.82E-02 | 3    | 117 | 2  | 66.7% | <i>CYP2A6,CYP2A7</i>                                                                                                                          |

### c. Somatic CNVs: normal term pregnancy

| <i>Duplications specific to placentas from normal, uncomplicated term pregnancies</i> |               |                                                             |             |                     |                  |                |                  |                                                                                                                                                                                      |
|---------------------------------------------------------------------------------------|---------------|-------------------------------------------------------------|-------------|---------------------|------------------|----------------|------------------|--------------------------------------------------------------------------------------------------------------------------------------------------------------------------------------|
| category_ID                                                                           | category_type | category_name                                               | FDR_p-value | n_genes_in_category | n_genes_in_query | n_common_genes | %_genes_category | common_genes                                                                                                                                                                         |
| GO:0009952                                                                            | BP            | anterior/posterior pattern specification                    | 2.81E-12    | 202                 | 306              | 18             | 8.9%             | <i>HTT,HOXA1,HOXA2,HOXA3,HOXA4,HOXA5,HOXA6,HOXA7,HOXA10,HOXA11,RP11-834C11.14,HOXC13,HOXC11,HOXC10,HOXC6,HOXC9,HOXC8,HOXC5</i>                                                       |
| GO:0048706                                                                            | BP            | embryonic skeletal system development                       | 2.98E-09    | 122                 | 306              | 13             | 10.7%            | <i>HOXA1,HOXA2,HOXA3,HOXA4,HOXA5,HOXA6,HOXA7,HOXA11,RP11-834C11.14,HOXC11,HOXC6,HOXC9,HOXC5</i>                                                                                      |
| GO:0043565                                                                            | MF            | sequence-specific DNA binding                               | 1.20E-07    | 724                 | 306              | 24             | 3.3%             | <i>HOXA1,HOXA2,HOXA3,HOXA4,HOXA5,HOXA6,HOXA7,HOXA9,RP11-170O19.20,HOXA10,HOXA11,HOXA13,MAFA,RP11-834C11.14,HOXC13,HOXC12,HOXC11,HOXC10,HOXC6,HOXC9,HOXC8,HOXC4,HOXC5,CEBPG</i>       |
| GO:0048704                                                                            | BP            | embryonic skeletal system morphogenesis                     | 9.15E-07    | 91                  | 306              | 10             | 11.0%            | <i>HOXA1,HOXA2,HOXA3,HOXA4,HOXA5,HOXA6,HOXA7,HOXA11,HOXC11,HOXC9</i>                                                                                                                 |
| GO:0003700                                                                            | MF            | sequence-specific DNA binding transcription factor activity | 3.10E-04    | 1166                | 306              | 25             | 2.1%             | <i>FBXW7,HOXA1,HOXA2,HOXA3,HOXA4,HOXA5,HOXA6,HOXA7,HOXA9,RP11-170O19.20,HOXA10,HOXA11,HOXA13,MAFA,RP11-834C11.14,HOXC13,HOXC12,HOXC11,HOXC10,HOXC6,HOXC9,HOXC8,HOXC4,HOXC5,CEBPG</i> |
| GO:0007565                                                                            | BP            | female pregnancy                                            | 4.83E-04    | 174                 | 306              | 10             | 5.7%             | <i>ADRA2C,PSG8,PSG1,PSG6,PSG7,PSG11,PSG2,PSG5,PSG4,PSG9</i>                                                                                                                          |

---

*Deletions specific to placentas from normal, uncomplicated term pregnancies*

| category_ID | category_type | category_name                   | FDR_p-value | n_genes_in_category | n_genes_in_query | n_common_genes | %_genes_category | common_genes         |
|-------------|---------------|---------------------------------|-------------|---------------------|------------------|----------------|------------------|----------------------|
| GO:0008389  | MF            | coumarin 7-hydroxylase activity | 5.00E-02    | 2                   | 265              | 2              | 100.0%           | <i>CYP2A6,CYP2A7</i> |

---

**d. Somatic CNVs: complicated pregnancies**

*Duplications specific to placentas from pregnancies resulting in Small-for-Gestational Age (SGA) newborns*  
 No significant enrichment

---

*Deletions specific to placentas from pregnancies resulting in Small-for-Gestational Age (SGA) newborns*  
 No significant enrichment

---

*Duplications specific to placentas from pregnancies resulting in Large-for-Gestational Age (LGA) newborns*

| category_ID       | category_type | category_name                                       | FDR_p-value | n_genes_in_category | n_genes_in_query | n_common_genes | %_genes_category | common_genes                                                             |
|-------------------|---------------|-----------------------------------------------------|-------------|---------------------|------------------|----------------|------------------|--------------------------------------------------------------------------|
| MI:hsa-miR-615-5p | mi            | MI:hsa-miR-615-5p                                   | 4.26E-02    | 794                 | 129              | 10             | 1.3%             | <i>TNFRSF18,SDF4,B3GALT6,FAM132A,PUSL1,ASIR3,PEF1,WDR86,DPYSL4,BCAT1</i> |
| GO:0045979        | BP            | positive regulation of nucleoside metabolic process | 4.90E-02    | 3                   | 129              | 2              | 66.7%            | <i>PID1,ARHGEF10</i>                                                     |

---

*Deletions specific to placentas from pregnancies resulting in Large-for-Gestational Age (LGA) newborns*

| category_ID     | category_type | category_name                          | FDR_p-value | n_genes_in_category | n_genes_in_query | n_common_genes | %_genes_category | common_genes                                                                                                                                                               |
|-----------------|---------------|----------------------------------------|-------------|---------------------|------------------|----------------|------------------|----------------------------------------------------------------------------------------------------------------------------------------------------------------------------|
| GO:0051453      | BP            | regulation of intracellular pH         | 6.37E-03    | 35                  | 331              | 5              | 14.3%            | <i>ATP6V0E1,RAB39A,CHP1,CLN3</i>                                                                                                                                           |
| GO:1902589      | BP            | single-organism organelle organization | 1.52E-02    | 1738                | 331              | 28             | 1.6%             | <i>CDK11A,TMSB10,TRIP12,EPHA3,PRKCI,YEATS2,PLK4,NSD1,CDK13,MPLKIP,AB11,TACC2,RAB39A,EEA1,BMP4,INO80,CHP1,OIP5,NUSAP1,RTF1,CLN3,CLN3,MAPK3,PAPD5,TXNL4B,DC6,PHF20,EP300</i> |
| MI:hsa-miR-301a | mi            | MI:hsa-miR-301a                        | 2.62E-02    | 764                 | 331              | 15             | 2.0%             | <i>USP48,WDR47,METTL6,HSPA4L,C4ORF29,RP L26L1,SGK1,C9ORF64,EEA1,PCCA,NFATC3,PHF20,MCHR1,DNAJB7,EP300</i>                                                                   |

---

---

**Duplications specific to placentas from preeclamptic (PE) pregnancies**

| <b>category_ID</b> | <b>category_ type</b> | <b>category_name</b>        | <b>FDR_p-value</b> | <b>n_genes_in _category</b> | <b>n_genes_in _query</b> | <b>n_common _genes</b> | <b>%_genes_cate gory</b> | <b>common_genes</b>                                                                                                                        |
|--------------------|-----------------------|-----------------------------|--------------------|-----------------------------|--------------------------|------------------------|--------------------------|--------------------------------------------------------------------------------------------------------------------------------------------|
| GO:0004984         | MF                    | olfactory receptor activity | 1.10E-16           | 420                         | 161                      | 17                     | 4.0%                     | <i>OR11H12,OR4N2,OR4Q3,OR4M1,OR4K2,OR4K5,OR4K1,OR4K15,OR4Q2,OR4K14,OR4K13,OR4L1,OR4K17,OR4N5,OR11G2,OR11H2,OR4K3</i>                       |
| GO:0071944         | CC                    | cell periphery              | 5.14E-03           | 4640                        | 161                      | 21                     | 0.5%                     | <i>GCA,KCNH7,ITPR3,OR11H12,POTEG,OR4N2,OR4Q3,OR4M1,OR4K2,OR4K5,OR4K1,OR4K15,OR4Q2,OR4K14,OR4K13,OR4L1,OR4K17,OR4N5,OR11G2,OR11H2,OR4K3</i> |

---

**Deletions specific to placentas from preeclamptic (PE) pregnancies**

No significant enrichment

---

**Duplications specific to placentas from gestational diabetes (GD) pregnancies**

| <b>category_ID</b> | <b>category_ type</b> | <b>category_name</b>                      | <b>FDR_p-value</b> | <b>n_genes_in _category</b> | <b>n_genes_in _query</b> | <b>n_common _genes</b> | <b>%_genes_cate gory</b> | <b>common_genes</b> |
|--------------------|-----------------------|-------------------------------------------|--------------------|-----------------------------|--------------------------|------------------------|--------------------------|---------------------|
| GO:0005041         | MF                    | low-density lipoprotein receptor activity | 2.87E-02           | 10                          | 32                       | 2                      | 20.0%                    | <i>LRP1B,CD36</i>   |

---

**Deletions specific to placentas from gestational diabetes (GD) pregnancies**

| <b>category_ID</b> | <b>category_ type</b> | <b>category_name</b>                           | <b>FDR_p-value</b> | <b>n_genes_in _category</b> | <b>n_genes_in _query</b> | <b>n_common _genes</b> | <b>%_genes_cate gory</b> | <b>common_genes</b> |
|--------------------|-----------------------|------------------------------------------------|--------------------|-----------------------------|--------------------------|------------------------|--------------------------|---------------------|
| GO:0045747         | BP                    | positive regulation of Notch signaling pathway | 5.37E-03           | 22                          | 9                        | 2                      | 9.1%                     | <i>TP63,EYAI</i>    |
| GO:0048645         | BP                    | organ formation                                | 4.11E-02           | 60                          | 9                        | 2                      | 3.3%                     | <i>TP63,EYAI</i>    |

---

### e. Parental blood CNVs

#### *Duplications in the parental genome*

| category_ID | category_type | category_name                       | FDR_p-value | n_genes_in_category | n_genes_in_query | n_common_genes | %_genes_category | common_genes                                                                                                                                                                                                                                                                                                                                                                                                                                                                                                                                              |
|-------------|---------------|-------------------------------------|-------------|---------------------|------------------|----------------|------------------|-----------------------------------------------------------------------------------------------------------------------------------------------------------------------------------------------------------------------------------------------------------------------------------------------------------------------------------------------------------------------------------------------------------------------------------------------------------------------------------------------------------------------------------------------------------|
| GO:0003823  | MF            | antigen binding                     | 1.58E-05    | 90                  | 1079             | 11             | 12.2%            | <i>IGKV3-20,MICA,IGHA2,IGHE,IGHG4,IGHG2,IGHA1,IGHG1,IGHG3,IGHD,IGHM</i>                                                                                                                                                                                                                                                                                                                                                                                                                                                                                   |
| GO:0004984  | MF            | olfactory receptor activity         | 4.49E-05    | 420                 | 1079             | 21             | 5.0%             | <i>OR4C12,OR11H12,OR4N2,OR4Q3,OR4M1,OR4K2,OR4K5,OR4K1,OR11H2,OR4K3,OR4K15,OR4Q2,OR4K14,OR4K13,OR4L1,OR4K17,OR4N5,OR4M2,OR4N4,OR4F6,OR4F15</i>                                                                                                                                                                                                                                                                                                                                                                                                             |
| GO:0042571  | CC            | immunoglobulin complex, circulating | 1.88E-04    | 5                   | 1079             | 4              | 80.0%            | <i>IGKV3-20,IGHA2,IGHA1,IGHM</i>                                                                                                                                                                                                                                                                                                                                                                                                                                                                                                                          |
| GO:0072562  | CC            | blood microparticle                 | 9.27E-04    | 133                 | 1079             | 11             | 8.3%             | <i>IGKV3-20,KNIG1,POTEG,IGHA2,IGHG4,IGHG2,IGHA1,IGHG1,IGHG3,IGHD,IGHM</i>                                                                                                                                                                                                                                                                                                                                                                                                                                                                                 |
| GO:0009411  | BP            | response to UV                      | 1.93E-02    | 117                 | 1079             | 9              | 7.7%             | <i>MAP4K3,REV1,ZRANB3,RAD18,MAP3K4,CAT,CRIP1,CRIP1,POLD1</i>                                                                                                                                                                                                                                                                                                                                                                                                                                                                                              |
| GO:0071944  | CC            | cell periphery                      | 2.74E-02    | 4640                | 1079             | 82             | 1.8%             | <i>PLCH2,F3,TSNAX-DISC1,DISC1,CHRM3,FAM110C,IGKV3-20,TM4SF20,GPR35,CAV3,GPR128,NLGN1,KNIG1,JADE1,GOLPH3,OCLN,MICA,NKAIN2,STXBP5,RP11-361F15.2,BBS9,UPK3B,BAIAP2L1,CNTNAP2,VIPR2,KANK1,PTPRD,TRPM3,SLC31A1,FAM21C,SYT15,NPY4R,ANXA8L1,INPP5A,SPRN,NLRP6,IFITM5,IFITM2,IFITM1,IFITM3,PKP3,ANO9,CAT,OR4C12,ACY3,CNTN5,SLC2A3,SLCO1B1,SCARB1,ABCC4,SLC10A2,OR11H12,POTEG,OR4N2,OR4Q3,OR4M1,OR4K2,OR4K5,OR4K1,OR11H2,OR4K3,OR4K15,OR4Q2,OR4K14,OR4K13,OR4L1,OR4K17,OR4N5,IGHD,IGHM,POTEB,OR4M2,OR4N4,SPTBN5,EHD4,OR4F6,OR4F15,TMEM231,KCNC3,FPR1,FPR2,FPR3</i> |

| Deletions in the parental genome |               |                                                                                                   |             |                     |                  |                |                  |                                                                                                                           |
|----------------------------------|---------------|---------------------------------------------------------------------------------------------------|-------------|---------------------|------------------|----------------|------------------|---------------------------------------------------------------------------------------------------------------------------|
| category_ID                      | category_type | category_name                                                                                     | FDR_p-value | n_genes_in_category | n_genes_in_query | n_common_genes | %_genes_category | common_genes                                                                                                              |
| GO:0005231                       | MF            | excitatory extracellular ligand-gated ion channel activity                                        | 1.21E-03    | 51                  | 616              | 7              | 13.7%            | <i>GRID2,GRID1,GRIK4,GRIN2A,SHPK,P2RX5-TAX1BP3,P2RX5</i>                                                                  |
| GO:0005216                       | MF            | ion channel activity                                                                              | 1.63E-03    | 373                 | 616              | 16             | 4.3%             | <i>GRID2,OPRM1,AOC1,SLC26A7,GRID1,GRIK4,CACNA1C,CHRFAM7A,CATSPER2,GRIN2A,SHPK,P2RX5-TAX1BP3,P2RX5,PIEZO2,TPTE,CACNA1I</i> |
| GO:0007215                       | BP            | glutamate receptor signaling pathway                                                              | 4.19E-03    | 61                  | 616              | 7              | 11.5%            | <i>NRXN1,GRID2,OPRM1,GRID1,GRM5,GRIK4,GRIN2A</i>                                                                          |
| GO:0008066                       | MF            | glutamate receptor activity                                                                       | 9.32E-03    | 26                  | 616              | 5              | 19.2%            | <i>GRID2,GRID1,GRM5,GRIK4,GRIN2A</i>                                                                                      |
| GO:0007565                       | BP            | female pregnancy                                                                                  | 1.65E-02    | 174                 | 616              | 10             | 5.7%             | <i>RLN1,PSG8,PSG1,PSG6,PSG7,PSG11,PSG2,PSG5,PSG4,PSG9</i>                                                                 |
| GO:0070383                       | BP            | DNA cytosine deamination                                                                          | 1.80E-02    | 5                   | 616              | 3              | 60.0%            | <i>APOBEC3D,APOBEC3F,APOBEC3G</i>                                                                                         |
| GO:0030534                       | BP            | adult behavior                                                                                    | 1.81E-02    | 139                 | 616              | 9              | 6.5%             | <i>NRXN1,FGF12,OPRM1,PCDH15,CACNA1C,EP8,KLHL1,CTNS,NTSR1</i>                                                              |
| GO:0007626                       | BP            | locomotory behavior                                                                               | 2.23E-02    | 180                 | 616              | 10             | 5.6%             | <i>FGF12,OPRM1,APBA1,PCDH15,GRM5,CACNA1C,EP8,KLHL1,CTNS,NTSR1</i>                                                         |
| GO:0045869                       | BP            | negative regulation of single stranded viral RNA replication via double stranded DNA intermediate | 3.58E-02    | 6                   | 616              | 3              | 50.0%            | <i>APOBEC3D,APOBEC3F,APOBEC3G</i>                                                                                         |
| GO:0016160                       | MF            | amylase activity                                                                                  | 3.58E-02    | 6                   | 616              | 3              | 50.0%            | <i>AMY2A,AMY1A,MGAM</i>                                                                                                   |

BP, biological process; MF, molecular function; CC, cellular component; mi, miRBase microRNAs.

**Supplementary Table 6. Functional profiling of placental CNVs with WebGestalt.** The list of genes in somatic and inherited duplication and deletion CNVs was subjected to functional enrichment analysis using WebGestalt software<sup>1</sup> and included Gene Ontology (GO) functional category.

| <b>Significantly overrepresented functional categories</b> |                                                            | <b>Enrichment analysis</b> |                         |
|------------------------------------------------------------|------------------------------------------------------------|----------------------------|-------------------------|
| <b>GO:ID</b>                                               | <b>Name</b>                                                | <b>Pathway genes (%)</b>   | <b>FDR P-value</b>      |
| <b><i>Somatic duplication CNVs</i></b>                     |                                                            |                            |                         |
| 0009952                                                    | anterior/posterior pattern specification                   | 10.6                       | 2.32 x 10 <sup>-6</sup> |
| 0007156                                                    | homophilic cell adhesion                                   | 12.1                       | 1.13 x 10 <sup>-5</sup> |
| 0003002                                                    | regionalization                                            | 8.1                        | 1.45 x 10 <sup>-5</sup> |
| 0001501                                                    | skeletal system development                                | 7.2                        | 1.75 x 10 <sup>-5</sup> |
| 0016337                                                    | cell-cell adhesion                                         | 6.9                        | 3.44 x 10 <sup>-5</sup> |
| 0003823                                                    | antigen binding                                            | 16.7                       | 6.00 x 10 <sup>-5</sup> |
| 0005509                                                    | calcium ion binding                                        | 5.4                        | 1.00 x 10 <sup>-4</sup> |
| 0006958                                                    | complement activation, classical pathway                   | 18                         | 3.00 x 10 <sup>-4</sup> |
| 0006956                                                    | complement activation                                      | 15.6                       | 3.00 x 10 <sup>-4</sup> |
| 0072376                                                    | protein activation cascade                                 | 13.3                       | 4.00 x 10 <sup>-4</sup> |
| <b><i>Somatic deletion CNVs</i></b>                        |                                                            |                            |                         |
| 0006996                                                    | organelle organization                                     | 4.4                        | 7.18 x 10 <sup>-6</sup> |
| 0048285                                                    | organelle fission                                          | 7.7                        | 2.06 x 10 <sup>-5</sup> |
| 0000279                                                    | M phase                                                    | 6.5                        | 3.37 x 10 <sup>-5</sup> |
| 0007067                                                    | mitosis                                                    | 7.6                        | 3.37 x 10 <sup>-5</sup> |
| 0000280                                                    | nuclear division                                           | 7.6                        | 3.37 x 10 <sup>-5</sup> |
| 0000087                                                    | M phase of mitotic cell cycle                              | 7.4                        | 4.31 x 10 <sup>-5</sup> |
| 0043227                                                    | membrane-bounded organelle                                 | 2.9                        | 4.86 x 10 <sup>-5</sup> |
| 0043231                                                    | intracellular membrane-bounded organelle                   | 2.9                        | 4.86 x 10 <sup>-5</sup> |
| 0044424                                                    | intracellular part                                         | 2.7                        | 5.69 x 10 <sup>-5</sup> |
| 0005622                                                    | intracellular                                              | 2.7                        | 5.69 x 10 <sup>-5</sup> |
| <b><i>Inherited duplication CNVs</i></b>                   |                                                            |                            |                         |
| no functional categories significantly enriched            |                                                            |                            |                         |
| <b><i>Inherited deletion CNVs</i></b>                      |                                                            |                            |                         |
| 0007565                                                    | female pregnancy                                           | 6.1                        | 3.92 x 10 <sup>-8</sup> |
| 0044706                                                    | multi-multicellular organism process                       | 5.2                        | 7.52 x 10 <sup>-8</sup> |
| 0005576                                                    | extracellular region                                       | 0.9                        | 3.58 x 10 <sup>-5</sup> |
| 0005234                                                    | extracellular-glutamate-gated ion channel activity         | 15.8                       | 4.00 x 10 <sup>-4</sup> |
| 0004970                                                    | ionotropic glutamate receptor activity                     | 16.7                       | 4.00 x 10 <sup>-4</sup> |
| 0016160                                                    | amylase activity                                           | 50                         | 5.00 x 10 <sup>-4</sup> |
| 0008066                                                    | glutamate receptor activity                                | 11.5                       | 5.00 x 10 <sup>-4</sup> |
| 0007215                                                    | glutamate receptor signaling pathway                       | 6.3                        | 1.38 x 10 <sup>-2</sup> |
| 0032501                                                    | multicellular organismal process                           | 0.5                        | 1.38 x 10 <sup>-2</sup> |
| 0005231                                                    | excitatory extracellular ligand-gated ion channel activity | 6.3                        | 2.70 x 10 <sup>-3</sup> |

**Supplementary Table 7. Recurrent somatic CNVs detected in at least three placentas.** Start and end positions indicate overlapping regions of all the carriers.

| CNVR_ID | Chr | Start pos | End pos   | Chr band | Length | Type     | No of carriers | Groups                     | Genes                                                                                                                                       |
|---------|-----|-----------|-----------|----------|--------|----------|----------------|----------------------------|---------------------------------------------------------------------------------------------------------------------------------------------|
| CNVR_1  | 1   | 3423467   | 3531594   | 1p36.32  | 108127 | Dupl     | 3              | 2 LGA, 1 norm              | <i>MEGF6, MIR551A</i>                                                                                                                       |
| CNVR_2  | 1   | 10009925  | 10120793  | 1p36.22  | 110868 | Del      | 6              | 2 LGA, 2 PE, 1 GD, 1 norm  | <i>NMNAT1, RBP7, UBE4B, RP11-84A14.4, MIR5697, RP11-807G9.2, AL590639.1, RP11-496H15.2, PGAMIP11</i>                                        |
| CNVR_3  | 1   | 53180565  | 53218380  | 1p32.3   | 37815  | Del      | 3              | 2 norm, 1 LGA              | <i>ZYG11B</i>                                                                                                                               |
| CNVR_4  | 1   | 73386470  | 73482160  | 1p31.1   | 95690  | Dupl     | 3              | 3 norm                     | -                                                                                                                                           |
| CNVR_5  | 1   | 98292912  | 98316285  | 1p21.3   | 23373  | Dupl     | 4              | 2 PE, 2 norm               | <i>DPYD</i>                                                                                                                                 |
| CNVR_6  | 1   | 103342391 | 103467615 | 1p21.1   | 125224 | Dupl     | 5              | 2 SGA, 2 norm, 1 GD        | <i>COL11A1</i>                                                                                                                              |
| CNVR_7  | 1   | 113026556 | 113040420 | 1p13.2   | 13864  | Del      | 3              | 2 norm, 1 GD               | <i>WNT2B</i>                                                                                                                                |
| CNVR_8  | 1   | 232575539 | 232584061 | 1q42.2   | 8522   | Dupl     | 3              | 2 PE, 1 norm               | <i>SIPA1L2</i>                                                                                                                              |
| CNVR_9  | 2   | 32148619  | 32611512  | 2p22.3   | 462893 | Del      | 4              | 3 PE, 1 norm               | <i>CTC-336P14.1, AL121655.1, RP11-563N4.1, DDX50P1, RNU6-647P, AL133245.2, MEMO1, BIRC6-ASI, DPY30, SPAST, SLC30A6, NLRC4, YIPF4, BIRC6</i> |
| CNVR_10 | 2   | 34699812  | 34726904  | 2p22.3   | 27092  | Del      | 4              | 2 LGA, 1 SGA, 1 norm       | <i>AC073218.1</i>                                                                                                                           |
| CNVR_11 | 2   | 38296889  | 38303094  | 2p22.2   | 6205   | Dupl     | 3              | 2 PE, 1 GD                 | <i>CYP1B1-ASI, CYP1B1</i>                                                                                                                   |
| CNVR_12 | 2   | 42690479  | 42881534  | 2p21     | 191055 | Del      | 3              | 1 LGA, 1 GD, 1 norm        | <i>AC025750.6, AC025750.5, AC025750.7, Y_RNA, KCNG3, MTA3</i>                                                                               |
| CNVR_13 | 2   | 51926599  | 51926904  | 2p16.3   | 305    | Del/Dupl | 1/2            | 2 norm, 1 GD               | <i>AC007682.1</i>                                                                                                                           |
| CNVR_14 | 2   | 188388310 | 188545602 | 2q32.1   | 157292 | Dupl     | 3              | 2 GD, 1 PE                 | <i>AC007319.1, TFPI</i>                                                                                                                     |
| CNVR_15 | 2   | 242795350 | 243048760 | 2q37.3   | 253410 | Dupl     | 4              | 2 LGA, 2 PE                | <i>AC131097.3, AC093642.3, AC093642.4, AC093642.6, RP11-341N2.1, AC093642.5, PDCD1, CXXC11, AC131097.4</i>                                  |
| CNVR_16 | 3   | 51527117  | 51577966  | 3p21.2   | 50849  | Del      | 11             | 4 LGA, 3 PE, 2 SGA, 2 norm | <i>VPRBP, RAD54L2</i>                                                                                                                       |
| CNVR_17 | 3   | 125897537 | 125973658 | 3q21.3   | 76121  | Dupl     | 3              | 1 SGA, 1 GD, 1 norm        | <i>ALDH1L1-AS2, ALDH1L1</i>                                                                                                                 |
| CNVR_18 | 3   | 162130691 | 162142475 | 3q26.1   | 11784  | Del      | 3              | 2 PE, 1 SGA                | -                                                                                                                                           |
| CNVR_19 | 3   | 189738195 | 189739056 | 3q28     | 861    | Del      | 8              | 3 norm, 2 PE, 2 SGA, 1 GD  | <i>LEPREL1</i>                                                                                                                              |
| CNVR_20 | 4   | 32446724  | 32495165  | 4p15.1   | 48441  | Dupl     | 6              | 3 norm, 2 SGA, 1 GD        | -                                                                                                                                           |



| CNVR_ID | Chr | Start pos | End pos   | Chr band | Length | Type     | No of    |                                  | Genes                                                                                                              |
|---------|-----|-----------|-----------|----------|--------|----------|----------|----------------------------------|--------------------------------------------------------------------------------------------------------------------|
|         |     |           |           |          |        |          | carriers | Groups                           |                                                                                                                    |
| CNVR_21 | 4   | 137542931 | 137698875 | 4q28.3   | 155944 | Dupl     | 6        | 3 norm, 1 SGA, 1 PE, 1 GD        | <i>AC093875.1</i>                                                                                                  |
| CNVR_22 | 4   | 146025645 | 146055117 | 4q31.21  | 29472  | Dupl     | 5        | 2 SGA, 2 norm, 1 GD              | <i>ABCE1,OTUD4</i>                                                                                                 |
| CNVR_23 | 5   | 7885226   | 7920843   | 5p15.31  | 35617  | Dupl     | 3        | 1 LGA, 1 PE, 1 norm              | <i>MTRR</i>                                                                                                        |
| CNVR_24 | 5   | 24779565  | 24806889  | 5p14.1   | 27324  | Dupl     | 3        | 1 SGA, 1 GD, 1 norm              | <i>RP11-12P19.1</i>                                                                                                |
| CNVR_25 | 5   | 25687036  | 25723615  | 5p14.1   | 36579  | Dupl     | 4        | 2 GD, 1 SGA, 1 norm              | <i>RNU6-374P</i>                                                                                                   |
| CNVR_26 | 5   | 34107121  | 34190148  | 5p13.2   | 83027  | Dupl     | 8        | 4 PE, 2 SGA, 1 LGA, 1 norm       | <i>RP11-1250I15.3,RP11-1023L17.1,RP11-1084J3.4</i>                                                                 |
| CNVR_27 | 5   | 39113637  | 39124016  | 5p13.1   | 10379  | Dupl     | 3        | 2 norm, 1 SGA                    | <i>FYB</i>                                                                                                         |
| CNVR_28 | 5   | 44513809  | 44517392  | 5p12     | 3583   | Dupl     | 4        | 2 LGA, 1 GD, 1 norm              | -                                                                                                                  |
| CNVR_29 | 5   | 125946011 | 126095011 | 5q23.2   | 149000 | Del      | 4        | 2 LGA, 2 norm                    | <i>RP11-395C3.1,RP11-772E11.1,HSPE1P10,RP11-434D11.4,RNU6-752P,PHAX,C5ORF48</i>                                    |
| CNVR_30 | 5   | 140165568 | 140246287 | 5q31.3   | 80719  | Dupl     | 6        | 3 norm, 2 SGA, 1 PE              | <i>PCDHA14,PCDHA1,PCDHA2,PCDHA3,PCDHA4,PCDHA5,PCDHA6,PCDHA7,PCDHA8,PCDHA9,PCDHA10,AC005609.1</i>                   |
| CNVR_31 | 5   | 142770134 | 142780485 | 5q31.3   | 10351  | Dupl     | 4        | 2 PE, 1 LGA, 1 norm              | <i>NR3C1</i>                                                                                                       |
| CNVR_32 | 6   | 31919577  | 32017539  | 6p21.33  | 97962  | Dupl     | 3        | 1 LGA, 1 PE, 1 norm              | <i>MIR1236,C4A-AS1,CYP21A1P,TNXA,STK19P,C4B-AS1,CFB,CFB,NELFE,SKIV2L,DXO,STK19,C4A,AL645922.1,C4B,CYP21A2,TNXB</i> |
| CNVR_33 | 6   | 77439969  | 77448731  | 6q14.1   | 8762   | Del      | 5        | 2 PE, 2 GD, 1 SGA                | -                                                                                                                  |
| CNVR_34 | 6   | 78979398  | 79029367  | 6q14.1   | 49969  | Del/Dupl | 1/4      | 4 norm, 1 LGA                    | -                                                                                                                  |
| CNVR_35 | 6   | 93965265  | 94117546  | 6q16.1   | 152281 | Dupl     | 12       | 4 GD, 4 norm, 2 SGA, 1 LGA, 1 PE | <i>EPHA7</i>                                                                                                       |
| CNVR_36 | 6   | 101927337 | 101953555 | 6q16.3   | 26218  | Dupl     | 3        | 2 norm, 1 SGA                    | <i>GRIK2</i>                                                                                                       |
| CNVR_37 | 6   | 147635547 | 147709180 | 6q24.3   | 73633  | Dupl     | 3        | 1 SGA, 1 GD, 1 norm              | <i>STXBP5,RP11-361F15.2</i>                                                                                        |
| CNVR_38 | 6   | 160812187 | 160854138 | 6q25.3   | 41951  | Dupl     | 6        | 2 PE, 2 norm, 1 LGA, 1 GD        | <i>SLC22A3,AL591069.1</i>                                                                                          |
| CNVR_39 | 7   | 11678246  | 11753281  | 7p21.3   | 75035  | Dupl     | 4        | 2 GD, 1 SGA, 1 norm              | <i>THSD7A</i>                                                                                                      |
| CNVR_40 | 7   | 13439084  | 13445967  | 7p21.3   | 6883   | Dupl     | 7        | 3 norm, 2 GD, 1 LGA, 1 PE        | <i>AC011288.2</i>                                                                                                  |
| CNVR_41 | 7   | 48310166  | 48318810  | 7p12.3   | 8644   | Dupl     | 7        | 2 SGA, 2 GD, 1 LGA, 1 PE, 1 norm | <i>ABCA13</i>                                                                                                      |
| CNVR_42 | 7   | 62154874  | 62159926  | 7q11.21  | 5052   | Del      | 5        | 2 LGA, 2 PE, 1 norm              | -                                                                                                                  |
| CNVR_43 | 7   | 88568549  | 88580316  | 7q21.13  | 11767  | Dupl     | 3        | 1 LGA, 1 PE, 1 norm              | <i>ZNF804B</i>                                                                                                     |
| CNVR_44 | 7   | 105036690 | 105073788 | 7q22.3   | 37098  | Del      | 3        | 2 norm, 1 PE                     | <i>SRPK2</i>                                                                                                       |

| CNVR ID | Chr | Start pos | End pos   | Chr band       | Length | Type | No of    |                                  | Genes                                                                                        |
|---------|-----|-----------|-----------|----------------|--------|------|----------|----------------------------------|----------------------------------------------------------------------------------------------|
|         |     |           |           |                |        |      | carriers | Groups                           |                                                                                              |
| CNVR_45 | 7   | 109441794 | 109451230 | 7q31.1         | 9436   | Del  | 4        | 2 PE, 2 norm                     | -                                                                                            |
| CNVR_46 | 8   | 2808265   | 2827657   | 8p23.2         | 19392  | Dupl | 11       | 5 norm, 2 SGA, 2 PE, 2 GD        | <i>CSMD1</i>                                                                                 |
| CNVR_47 | 8   | 4272581   | 4278256   | 8p23.2         | 5675   | Dupl | 3        | 2 LGA, 1 norm                    | <i>CSMD1</i>                                                                                 |
| CNVR_48 | 8   | 51031221  | 51033517  | 8q11.21        | 2296   | Del  | 3        | 2 LGA, 1 GD                      | <i>SNTG1</i>                                                                                 |
| CNVR_49 | 8   | 67623174  | 67677587  | 8q13.1         | 54413  | Del  | 4        | 2 LGA, 2 norm                    | <i>C8ORF44-SGK3,SGK3</i>                                                                     |
| CNVR_50 | 8   | 84077412  | 84097208  | 8q21.13        | 19796  | Dupl | 3        | 1 PE, 1 GD, 1 norm               | -                                                                                            |
| CNVR_51 | 8   | 113960534 | 114194727 | 8q23.3         | 234193 | Dupl | 5        | 2 LGA, 1 PE, 1 GD, 1 norm        | <i>CSMD3</i>                                                                                 |
| CNVR_52 | 8   | 144976654 | 145018354 | 8q24.3         | 41700  | Dupl | 3        | 1 SGA, 1 LGA, 1 norm             | <i>PLEC</i>                                                                                  |
| CNVR_53 | 9   | 14590805  | 14677538  | 8p22.3         | 86733  | Dupl | 4        | 3 norm, 1 GD                     | <i>ZDHHC21,RP11-408A13.1</i>                                                                 |
| CNVR_54 | 9   | 19142014  | 19206930  | 9p22.1         | 64916  | Del  | 8        | 3 PE, 3 GD, 1 LGA, 1 norm        | <i>PLIN2,RP11-146N23.1</i>                                                                   |
| CNVR_55 | 9   | 132655864 | 132830460 | 9q34.11        | 174596 | Del  | 3        | 2 LGA, 1 norm                    | <i>RP11-409K20.6,RP11-138E2.1,FNBPI,GPR107</i>                                               |
| CNVR_56 | 9   | 139240630 | 139303300 | 9q34.3         | 62670  | Dupl | 3        | 2 PE, 1 LGA                      | <i>GPSM1,DNLZ,CARD9,SNAPC4,SDCCAG3</i>                                                       |
| CNVR_57 | 10  | 20850624  | 20857365  | 10p12.31       | 6741   | Del  | 6        | 2 SGA, 2 PE, 1 GD, 1 norm        | -                                                                                            |
| CNVR_58 | 10  | 63166773  | 63183583  | 10q21.2        | 16810  | Dupl | 10       | 4 norm, 4 GD, 1 SGA, 1 PE        | <i>TMEM26</i>                                                                                |
| CNVR_59 | 10  | 66885915  | 66904588  | 10q21.3        | 18673  | Dupl | 4        | 2 GD, 1 SGA, 1 norm              | -                                                                                            |
| CNVR_60 | 10  | 68845232  | 68888491  | 10q21.3        | 43259  | Dupl | 5        | 2 GD, 1 SGA, 1 PE, 1 norm        | <i>CTNNA3,LRRTM3</i>                                                                         |
| CNVR_61 | 10  | 70174706  | 70319626  | 10q21.3        | 144920 | Del  | 3        | 2 norm, 1 LGA                    | <i>RP11-9E13.4,RNA5SP319,RP11-524O24.2,Y_RNA,TMEM14D,DNA2,SLC25A16</i>                       |
| CNVR_62 | 10  | 98513814  | 98604466  | 10q24.1        | 90652  | Del  | 6        | 3 LGA, 2 PE, 1 norm              | <i>LCOR,MIR607</i>                                                                           |
| CNVR_63 | 11  | 9226514   | 9516186   | 11p15.4        | 289672 | Del  | 3        | 3 PE                             | <i>DENND5A,TMEM41B,IPO7,AC132192.1,ZNF143,RP11-5L12.1,RP11-682B13.2,SNORA23,CTD-2371O3.2</i> |
| CNVR_64 | 11  | 48760364  | 48942781  | 11p11.2-p11.12 | 182417 | Del  | 21       | 7 norm, 6 PE, 4 LGA, 2 SGA, 2 GD | <i>RP11-56P9.5,RP11-56P9.10,RP11-56P9.6,RP11-56P9.4</i>                                      |
| CNVR_65 | 11  | 55365761  | 55427700  | 11q11          | 61939  | Del  | 4        | 2 norm, 1 PE, 1 GD               | <i>OR4C11,OR4P4,OR4S2</i>                                                                    |
| CNVR_66 | 11  | 88696662  | 88744425  | 11q14.3        | 47763  | Dupl | 7        | 2 SGA, 2 PE, 2 GD, 1 LGA         | <i>GRM5</i>                                                                                  |
| CNVR_67 | 12  | 21484512  | 21497891  | 12p12.1        | 13379  | Dupl | 3        | 2 norm, 1 GD                     | <i>SLCO1A2</i>                                                                               |

| CNVR ID | Chr | Start pos | End pos   | Chr band | Length | Type | No of carriers | Groups                           | Genes                                                                                                                                                                                                                                                                                                                                                                                                                                                                                                                                                                                                                                                                                                                                                                                                                                                                                                                                                                                                                                          |
|---------|-----|-----------|-----------|----------|--------|------|----------------|----------------------------------|------------------------------------------------------------------------------------------------------------------------------------------------------------------------------------------------------------------------------------------------------------------------------------------------------------------------------------------------------------------------------------------------------------------------------------------------------------------------------------------------------------------------------------------------------------------------------------------------------------------------------------------------------------------------------------------------------------------------------------------------------------------------------------------------------------------------------------------------------------------------------------------------------------------------------------------------------------------------------------------------------------------------------------------------|
| CNVR_68 | 12  | 22618605  | 22647856  | 12p12.1  | 29251  | Dupl | 11             | 4 norm, 3 SGA, 1 LGA, 2 GD, 1 PE | <i>C2CD5</i>                                                                                                                                                                                                                                                                                                                                                                                                                                                                                                                                                                                                                                                                                                                                                                                                                                                                                                                                                                                                                                   |
| CNVR_69 | 12  | 59935926  | 59942122  | 12q14.1  | 6196   | Del  | 4              | 2 PE, 1 LGA, 1 norm              | -                                                                                                                                                                                                                                                                                                                                                                                                                                                                                                                                                                                                                                                                                                                                                                                                                                                                                                                                                                                                                                              |
| CNVR_70 | 12  | 81009228  | 81091063  | 12q21.31 | 81835  | Dupl | 7              | 3 GD, 2 LGA, 2 PE                | <i>PTPRQ</i>                                                                                                                                                                                                                                                                                                                                                                                                                                                                                                                                                                                                                                                                                                                                                                                                                                                                                                                                                                                                                                   |
| CNVR_71 | 12  | 91495837  | 91519855  | 12q21.33 | 24018  | Dupl | 5              | 2 PE, 1 LGA, 1 GD, 1 norm        | <i>LUM</i>                                                                                                                                                                                                                                                                                                                                                                                                                                                                                                                                                                                                                                                                                                                                                                                                                                                                                                                                                                                                                                     |
| CNVR_72 | 13  | 70723292  | 70763597  | 13q21.33 | 40305  | Dupl | 4              | 2 norm, 1 SGA, 1 GD              | -                                                                                                                                                                                                                                                                                                                                                                                                                                                                                                                                                                                                                                                                                                                                                                                                                                                                                                                                                                                                                                              |
| CNVR_73 | 14  | 47320923  | 47408344  | 14q21.3  | 87421  | Dupl | 7              | 4 norm, 1 LGA, 1 SGA, 1 PE       | <i>MDGA2</i>                                                                                                                                                                                                                                                                                                                                                                                                                                                                                                                                                                                                                                                                                                                                                                                                                                                                                                                                                                                                                                   |
| CNVR_74 | 14  | 84159255  | 84223764  | 14q31.2  | 64509  | Dupl | 3              | 2 norm, 1 PE                     | <i>RNU6ATAC28P</i>                                                                                                                                                                                                                                                                                                                                                                                                                                                                                                                                                                                                                                                                                                                                                                                                                                                                                                                                                                                                                             |
| CNVR_75 | 14  | 106326623 | 106949307 | 14q32.33 | 622684 | Dupl | 6              | 3 LGA, 2 norm, 1 PE              | <i>IGHD2-2,KIAA0125,IGHD1-1,IGHV6-1,IGHV1-2,IGHV1-3,IGHV4-4,IGHV2-5,IGHV3-7,IGHV1-8,IGHV3-9,IGHV3-11,IGHV3-13,IGHV3-15,IGHV3-16,IGHV1-18,IGHV3-20,IGHV3-21,IGHV3-23,IGHV1-24,IGHV2-26,IGHV4-28,IGHV3-30,IGHV4-31,IGHV3-33,IGHV4-34,IGHV3-35,IGHV3-38,IGHV4-39,IGHV3-43,IGHJ3P,IGHJ2P,IGHJ1P,AL122127.25,IGHVII-1,ADAM6,AB019441.29,IGHVIII-2-1,IGHVIII-5-1,IGHVIII-5-2,IGHV3-6,IGHV2-10,IGHVIII-11-1,IGHV1-12,IGHVIII-13-1,IGHV1-14,IGHVII-15-1,IGHVIII-16-1,IGHV1-17,SLC20A1P2,IGHV3-19,AB019440.50,AB019440.1,IGHVII-20-1,IGHV3-22,IGHVII-22-1,IGHVIII-22-2,HOMER2P2,LINC00226,IGHV3-25,IGHVIII-25-1,IGHVIII-26-1,IGHVII-26-2,IGHV7-27,IGHVII-28-1,IGHV3-29,IGHVII-30-1,IGHV3-30-2,IGHVII-31-1,IGHV3-32,IGHVII-33-1,IGHV3-33-2,IGHV7-34-1,IGHV3-36,IGHV3-37,IGHVIII-38-1,IGHV7-40,AB019438.66,IGHVII-40-1,IGHV3-41,HOMER2P1,IGHV3-42,IGHVII-43-1,IGHVIII-44,LINC00221,IGHVIV-44-1,IGHJ6,IGHJ5,IGHJ4,IGHJ3,IGHJ2,IGHJ1,IGHD7-27,IGHD1-26,IGHD6-25,IGHD5-24,IGHD4-23,IGHD3-22,IGHD2-21,IGHD1-20,IGHD6-19,IGHD5-18,IGHD4-17,IGHD3-16,IGHD2-</i> |

|         |    |           |           |               |        |      |   |                            |                                                                                                                          |
|---------|----|-----------|-----------|---------------|--------|------|---|----------------------------|--------------------------------------------------------------------------------------------------------------------------|
| CNVR_76 | 15 | 100389182 | 100415574 | 15q26.3       | 26392  | Dupl | 4 | 1 SGA, 1 LGA, 1 PE, 1 GD   | 15,IGHD1-14,IGHD6-13,IGHD5-12,IGHD4-11,IGHD3-10,IGHD3-9,IGHD2-8,IGHD1-7,IGHD6-6,IGHD5-5,IGHD4-4,IGHD3-3<br>CTD-2054N24.2 |
| CNVR_77 | 15 | 102366849 | 102461162 | 15q26.3       | 94313  | Dupl | 3 | 1 LGA, 1 PE, 1 norm        | OR4F14P,OR4F13P,OR4F28P,WBP1LP5,AC140725.7                                                                               |
| CNVR_78 | 16 | 18982685  | 18994925  | 16p12.3       | 12240  | Del  | 3 | 1 SGA, 1 LGA, 1 PE         | -                                                                                                                        |
| CNVR_79 | 16 | 58589187  | 58741850  | 16q21         | 152663 | Del  | 3 | 2 LGA, 1 norm              | SNORA50,CTA-331F8.1,SNOU13,CNOT1,SLC38A7,GOT2                                                                            |
| CNVR_80 | 17 | 16058110  | 16178778  | 17p11.2       | 120668 | Del  | 3 | 2 LGA, 1 norm              | RN7SL442P,NCOR1,PIGL                                                                                                     |
| CNVR_81 | 17 | 27123816  | 27182944  | 17q11.2       | 59128  | Del  | 9 | 3 PE, 3 norm, 2 LGA, 1 SGA | FAM222B,ERAL1,RPL31P58,Y_RNA,RP11-20B24.3                                                                                |
| CNVR_82 | 17 | 74774824  | 74820856  | 17q25.1-p25.2 | 46032  | Del  | 3 | 2 LGA, 1 norm              | CTD-2246P4.1,MFSD11                                                                                                      |
| CNVR_83 | 18 | 12096249  | 12132247  | 18p11.21      | 35998  | Dupl | 4 | 2 norm, 1 PE, 1 GD         | RNU6-324P,RP11-815J4.4,ANKRD62                                                                                           |
| CNVR_84 | 18 | 24493424  | 24498427  | 18q11.2       | 5003   | Dupl | 3 | 2 norm, 1 LGA              | AQP4-ASI,CHST9                                                                                                           |
| CNVR_85 | 18 | 29554990  | 29687013  | 18q12.1       | 132023 | Del  | 3 | 1 LGA, 1 PE, 1 norm        | RP11-53I6.2,AC009831.1,RP11-53I6.1,RP11-53I6.3,SNOU13,RNF125,RNF138                                                      |
| CNVR_86 | 18 | 38573994  | 38630544  | 18q12.3       | 56550  | Dupl | 3 | 1 SGA, 1 GD, 1 norm        | -                                                                                                                        |
| CNVR_87 | 20 | 7288480   | 7326701   | 20p12.3       | 38221  | Dupl | 3 | 1 LGA, 1 PE, 1 norm        | -                                                                                                                        |
| CNVR_88 | 20 | 46000938  | 46208604  | 20q13.2       | 207666 | Del  | 3 | 2 PE, 1 norm               | RP1-148H17.1,RPL35AP,RNU6-497P,RNU6-563P,AL021394.1,NCOA3                                                                |
| CNVR_89 | 20 | 62038276  | 62053754  | 20q13.33      | 15478  | Dupl | 4 | 2 GD, 1 LGA, 1 norm        | KCNQ2                                                                                                                    |
| CNVR_90 | 22 | 19228736  | 19310812  | 22q11.21      | 82076  | Del  | 3 | 2 LGA, 1 norm              | SNORA15,KRT18P62,CLTCL1                                                                                                  |
| CNVR_91 | 22 | 36409990  | 36525981  | 22q12.3       | 115991 | Del  | 3 | 2 PE, 1 LGA                | RBFOX2                                                                                                                   |

CNVR, copy number variable region; Chr, chromosome, pos, position; No, number; Dupl, duplication; Del, deletion, norm, normal term; SGA, small-for-gestational age; GD, gestational diabetes; PE, preeclampsia; LGA, large-for-gestational age.

**Supplementary Table 8. Genes identified in somatic CNVs in human placental genomes in this study and reported with decreased copy number in mouse placental TGCs<sup>2</sup>**

| <b>Gene symbol</b> | <b>Name</b>                                                | <b>Chr human</b> | <b>Chr mouse</b> | <b>Function</b>                                                     | <b>Reference</b> |
|--------------------|------------------------------------------------------------|------------------|------------------|---------------------------------------------------------------------|------------------|
| <i>7SK</i>         | RNA, 7SK small nuclear                                     | *                | *                | transcription regulation                                            | 3                |
| <i>CDH19</i>       | Cadherin 19                                                | 18               | 1                | calcium-dependent cell adhesion                                     | 4                |
| <i>COL11A1</i>     | Collagen, type XI, alpha 1                                 | 1                | 3                | skeletal morphogenesis                                              | 5                |
| <i>CSMD3</i>       | CUB and Sushi multiple domains 3                           | 8                | 15               | transmembrane receptor/adhesion                                     | 6                |
| <i>DPYD</i>        | Dihydropyrimidine dehydrogenase                            | 1                | 3                | pyrimidine metabolism                                               | 7                |
| <i>EPHA5</i>       | EPH receptor A5                                            | 4                | 5                | axon guidance                                                       | 8                |
| <i>EPHA7</i>       | EPH receptor A7                                            | 6                | 4                | mediation of cortical neuronal maturation and function              | 9                |
| <i>GRIK2</i>       | Glutamate receptor, ionotropic, kainate 2                  | 6                | 10               | modulation of mossy fiber synaptic strength                         | 10               |
| <i>PTPRD</i>       | Protein tyrosine phosphatase (PTP), receptor type, D       | 9                | 4                | tumor suppression                                                   | 11               |
| <i>ROBO2</i>       | Roundabout, axon guidance receptor, homolog 2 (Drosophila) | 3                | 16               | axon guidance                                                       | 12               |
| <i>SLIT2</i>       | Slit homolog 2 (Drosophila)                                | 4                | 5                | axon guidance and neuronal migration                                | 13               |
| <i>SNORA42</i>     | Small nucleolar RNA SNORA42/SNORA80 family                 | *                | *                | guidance of the sites of modification of uridines to pseudouridines | 14               |
| <i>SNORA70</i>     | Small nucleolar RNA SNORA70                                | *                | *                | biogenesis (modification) of other small nuclear RNAs               | 15               |
| <i>U3</i>          | Small nucleolar RNA U3                                     | *                | *                | very early pre-rRNA processing                                      | 16               |

\* multiple genomic locations; TGC, trophoblast giant cells.

**Supplementary Table 9. GO:0005041 ‘Low-density lipoprotein receptor activity’ genes**

| Gene symbol   | Name                                                                          | Chr | Gene expression in placenta* |         | Linked to diabetes | Linked to pregnancy/<br>placental function | References |
|---------------|-------------------------------------------------------------------------------|-----|------------------------------|---------|--------------------|--------------------------------------------|------------|
|               |                                                                               |     | RNA                          | Protein |                    |                                            |            |
| <i>CD36</i>   | CD36 antigen                                                                  | 5   | +                            | -       | +                  | +                                          | 17, 18     |
| <i>CXCL16</i> | chemokine (C-X-C motif) ligand 16                                             | 11  | +                            | n.d     | +                  | +                                          | 19, 20, 21 |
| <i>LDLR</i>   | low density lipoprotein receptor                                              | 9   | +                            | n.d     | +                  | +                                          | 22, 23, 24 |
| <i>LRP10</i>  | low-density lipoprotein receptor-related protein 10                           | 14  | ++                           | +++     | -                  | -                                          |            |
| <i>LRP1B</i>  | low density lipoprotein-related protein 1B (deleted in tumors)                | 2   | -                            | n.d     | -                  | -                                          |            |
| <i>LRP6</i>   | low density lipoprotein receptor-related protein 6                            | 6   | +++                          | ++      | +                  | +                                          | 25, 26, 27 |
| <i>LRP8</i>   | low density lipoprotein receptor-related protein 8, apolipoprotein E receptor | 4   | +                            | n.d     | -                  | +                                          | 28         |
| <i>OLRI</i>   | oxidized low density lipoprotein (lectin-like) receptor 1                     | 6   | +++                          | ++      | +                  | +                                          | 29, 30     |
| <i>STAB1</i>  | stabilin 1                                                                    | 14  | ++                           | ++      | +                  | +                                          | 31, 32     |
| <i>STAB2</i>  | stabilin 2                                                                    | 10  | -                            | ++      | +                  | -                                          | 31         |

\* Gene expression in placenta at RNA and protein levels according to The Human Protein Atlas; <http://www.proteinatlas.org/>. +, low expression; ++, medium expression; +++, high expression; n.d, not determined.

## References

- 1 Zhang, B., Kirov, S. & Snoddy, J. WebGestalt: an integrated system for exploring gene sets in various biological contexts. *Nucleic Acids Res.* **33**, W741-748 (2005).
- 2 Hannibal, R. L. *et al.* Copy number variation is a fundamental aspect of the placental genome. *PLoS Genet.* **10**, e1004290 (2014).
- 3 Peterlin, B. M., Brogie, J. E. & Price, D. H. 7SK snRNA: a noncoding RNA that plays a major role in regulating eukaryotic transcription. *Wiley Interdiscip. Rev. RNA* **3**, 92-103 (2012).
- 4 Kools, P., Van Imschoot, G. & van Roy, F. Characterization of three novel human cadherin genes (CDH7, CDH19, and CDH20) clustered on chromosome 18q22-q23 and with high homology to chicken cadherin-7. *Genomics* **68**, 283-295 (2000).
- 5 Li, Y. *et al.* A fibrillar collagen gene, Col11a1, is essential for skeletal morphogenesis. *Cell* **80**, 423-430 (1995).
- 6 Floris, C. *et al.* Two patients with balanced translocations and autistic disorder: CSMD3 as a candidate gene for autism found in their common 8q23 breakpoint area. *Eur. J. Hum. Genet.* **16**, 696-704 (2008).
- 7 Chen, C. H. & Cheng, Y. C. The role of cytoplasmic deoxycytidine kinase in the mitochondrial effects of the anti-human immunodeficiency virus compound, 2',3'-dideoxycytidine. *J. Biol. Chem.* **267**, 2856-2859 (1992).
- 8 Stein, E. *et al.* A role for the Eph ligand ephrin-A3 in entorhino-hippocampal axon targeting. *J. Neurosci.* **19**, 8885-8893 (1999).
- 9 Clifford, M. A. *et al.* EphA7 signaling guides cortical dendritic development and spine maturation. *Proc. Natl. Acad. Sci. U.S.A.* **111**, 4994-4999 (2014).
- 10 Contractor, A., Swanson, G. & Heinemann, S. F. Kainate receptors are involved in short- and long-term plasticity at mossy fiber synapses in the hippocampus. *Neuron* **29**, 209-216 (2001).
- 11 Veeriah, S. *et al.* The tyrosine phosphatase PTPRD is a tumor suppressor that is frequently inactivated and mutated in glioblastoma and other human cancers. *Proc. Natl. Acad. Sci. U.S.A.* **106**, 9435-9440 (2009).
- 12 Fricke, C., Lee, J. S., Geiger-Rudolph, S., Bonhoeffer, F. & Chien, C. B. astray, a zebrafish roundabout homolog required for retinal axon guidance. *Science* **292**, 507-510 (2001).
- 13 Wu, J. Y. *et al.* The neuronal repellent Slit inhibits leukocyte chemotaxis induced by chemotactic factors. *Nature* **410**, 948-952 (2001).
- 14 Kiss, A. M., Jady, B. E., Bertrand, E. & Kiss, T. Human box H/ACA pseudouridylation guide RNA machinery. *Mol. Cell. Biol.* **24**, 5797-5807 (2004).
- 15 Ganot, P., Caizergues-Ferrer, M. & Kiss, T. The family of box ACA small nucleolar RNAs is defined by an evolutionarily conserved secondary structure and ubiquitous sequence elements essential for RNA accumulation. *Genes Dev.* **11**, 941-956 (1997).
- 16 Clery, A., Senty-Segault, V., Leclerc, F., Raue, H. A. & Branlant, C. Analysis of sequence and structural features that identify the B/C motif of U3 small nucleolar RNA as the recognition site for the Snu13p-Rrp9p protein pair. *Mol. Cell. Biol.* **27**, 1191-1206 (2007).
- 17 Handberg, A., Levin, K., Hojlund, K. & Beck-Nielsen, H. Identification of the oxidized low-density lipoprotein scavenger receptor CD36 in plasma: a novel marker of insulin resistance. *Circulation* **114**, 1169-1176 (2006).
- 18 Dube, E. *et al.* Modulation of fatty acid transport and metabolism by maternal obesity in the human full-term placenta. *Biol. Reprod.* **87**, 14, 1-11 (2012).

- 19 Gutwein, P. et al. CXCL16 and oxLDL are induced in the onset of diabetic nephropathy. *J. Cell Mol. Med.* **13**, 3809-3825 (2009).
- 20 Zhao, L. et al. Serum CXCL16 as a novel marker of renal injury in type 2 diabetes mellitus. *PloS One* **9**, e87786 (2014).
- 21 Huang, Y. et al. Chemokine CXCL16, a scavenger receptor, induces proliferation and invasion of first-trimester human trophoblast cells in an autocrine manner. *Hum. Reprod.* **21**, 1083-1091 (2006).
- 22 Cauchi, S. et al. Analysis of novel risk loci for type 2 diabetes in a general French population: the D.E.S.I.R. study. *J. Mol. Med.* **86**, 341-348 (2008).
- 23 Ethier-Chiasson, M. et al. Influence of maternal lipid profile on placental protein expression of LDLr and SR-BI. *Biochem. Biophys. Res. Commun.* **359**, 8-14 (2007).
- 24 Dube, E., Ethier-Chiasson, M. & Lafond, J. Modulation of cholesterol transport by insulin-treated gestational diabetes mellitus in human full-term placenta. *Biol. Reprod.* **88**, 16, 1-10 (2013).
- 25 Mani, A. et al. LRP6 mutation in a family with early coronary disease and metabolic risk factors. *Science* **315**, 1278-1282 (2007).
- 26 Singh, R. et al. LRP6 enhances glucose metabolism by promoting TCF7L2-dependent insulin receptor expression and IGF receptor stabilization in humans. *Cell Metab.* **17**, 197-209 (2013).
- 27 Pollheimer, J. et al. Activation of the canonical wntless/T-cell factor signaling pathway promotes invasive differentiation of human trophoblast. *Am. J. Path.* **168**, 1134-1147 (2006).
- 28 Wang, L. et al. Polymorphism in maternal LRP8 gene is associated with fetal growth. *Am. J. Hum. Gen.* **78**, 770-777 (2006).
- 29 Ethier-Chiasson, M. et al. Modulation of placental protein expression of OLR1: implication in pregnancy-related disorders or pathologies. *Reproduction* **136**, 491-502 (2008).
- 30 English, F. A. et al. Inhibition of lectin-like oxidized low-density lipoprotein-1 receptor protects against plasma-mediated vascular dysfunction associated with pre-eclampsia. *Am. J. Hypertens.* **26**, 279-286 (2013).
- 31 Tamura, Y. et al. FEEL-1 and FEEL-2 are endocytic receptors for advanced glycation end products. *J. Biol. Chem.* **278**, 12613-12617 (2003).
- 32 Kzhyshkowska, J. et al. Alternatively activated macrophages regulate extracellular levels of the hormone placental lactogen via receptor-mediated uptake and transcytosis. *J. Immunol.* **180**, 3028-3037 (2008).
